# Supplementary material
Source: publisher figshare collection journal article supplement (https://gsapubs.figshare.com/articles/dataset/_/16434879)
Supplement: Supplementary file 1 [file 1]

## Sheet: Maale Meyshar MMR Raw data
Supplemental Material - Raw U-Pb geochronological data U-Pb geochronology of phreatic and vadose speleothems: recording falling groundwater levels and uplift phases along the western shoulder of Dead Sea Transform Chaldekas, O., Vaks, A., Haviv, I., Gerdes, A., Albert, R.A.
Data is organized by Sample site and per sample in each site. See Table 2 for calculated geochronological ages.
Data is corrected for mass biased and interelement fractionation (laser-induced and plasma-induced). See Standards tab.
*Excluded measurements are points that were excluded from the calculation due to several reasons (exclusion of specific sub layers, Detrital material not common to sample, contaminated cracks, deviation from sub layer
Ma`ale Meyshar cave complex (MMR) data
Measurement	sample	206Pba	Ub	Pbb	Thb	238U d	±2s	207Pbd	±2s	Excluded
Sequence		(cps)	(ppb)	(ppb)	U	206Pb	(%)	206Pb	(%)	measurement
4	MMR-1 - D top	1907.06	552.652	7.81468	<0.0001	109.878	19.0857	0.7094	8.4
		1212.78	566.068	5.09822	<0.0001	168.067	9.11969	0.6633	8
		1141.85	586.115	4.87531	<0.0001	186.081	8.82491	0.7027	4.4
		1143.52	595.113	4.75456	<0.0001	190.549	11.1222	0.6736	5.8
		1188.39	706.739	4.87931	<0.0001	215.332	8.6253	0.6323	8.5
		1024.44	672.78	4.18265	<0.0001	239.177	12.1358	0.6325	10
		1175.28	542.061	4.9572	<0.0001	166.168	9.24457	0.6702	6.2
		1674.66	539.852	7.33548	<0.0001	116.131	9.34324	0.7374	3.6
		1127.16	595.887	4.73244	0.00021436	189.645	8.37045	0.6546	4.9
		707.294	649.771	2.82746	<0.0001	327.118	7.17765	0.5599	10
		672.58	672.116	2.6071	<0.0001	358.423	12.3479	0.5214	10
		1222.1	660.492	5.26252	<0.0001	192.493	7.57154	0.6864	5.7
		3243.67	677.945	14.6403	0.000123786	74.2942	5.94454	0.7683	3.8
		1358.6	665.091	5.75571	0.000161291	173.732	6.23993	0.6515	4.7
		3547.29	703.85	16.196	0.000211208	70.028	3.83591	0.7763	2.5
		874.735	684.177	3.57559	0.000188557	279.174	8.85221	0.6003	7.4
		806.755	631.774	3.27987	<0.0001	277.085	8.05458	0.5772	4.5
		3029.72	582.182	13.6898	0.000204741	67.8887	4.59976	0.7588	2.8
		850.365	546.651	3.62615	<0.0001	227.324	9.97926	0.6569	5.8
		3395.86	551.753	15.6436	<0.0001	57.1755	6.50689	0.7867	3
		834.38	805.378	3.3595	<0.0001	340.02	9.50111	0.5536	6.2
		1173.44	795.969	4.98024	<0.0001	238.152	2.84428	0.6363	7.2
		1064.56	752.809	4.50109	<0.0001	249.314	8.32342	0.6369	4
		945.543	807.149	3.92297	<0.0001	299.67	5.97755	0.5975	6.3
		1636.98	737.535	7.14699	<0.0001	157.903	5.48458	0.6823	3.1
		3790.43	790.235	17.604	<0.0001	72.5689	5.6489	0.782	2.8
3	MMR-1 - D	2977.58	1550.21	5.42239	<0.0001	397.5	9.68063	0.5216	6.1
		3870.44	1497.36	7.477	<0.0001	294.4	4.04076	0.6134	3.4
		5106.99	1134.76	10.2505	0.000194457	169.9	9.02031	0.6874	2.9
		3510.48	1141.4	6.83437	0.000188503	246.7	5.96523	0.6215	3
		4069.62	1501.12	7.96897	<0.0001	280.1	4.41339	0.6327	2.5
		3109.76	1475.22	5.78536	<0.0001	359.3	10.8477	0.5431	6.5
		4716.27	1229.83	9.5549	0.00018814	196.9	6.11699	0.682	3.5
		32884.9	1207.49	72.6282	0.000158692	27.28	28.0786	0.8099	2.3
		2214.62	1352.75	4.02449	<0.0001	460.9	4.6909	0.4997	5.1
		3155.2	1463.65	5.9559	<0.0001	350.2	9.33662	0.5616	4
		2839.97	1481.79	5.31937	<0.0001	391.7	5.29699	0.5398	5.9
		6534.14	1542.73	13.2218	<0.0001	178.4	9.49138	0.6809	1.9
		2579.86	1668.46	4.65398	<0.0001	485.5	7.63345	0.4801	7.1
		3378.2	1312.59	6.53453	<0.0001	292.3	9.27643	0.5963	5.2
		3215.79	1085.34	6.31031	0.000208536	251.7	10.8421	0.6056	4.4
		5249.7	1356.33	10.8571	<0.0001	192.9	3.32525	0.6983	2.6
		3611.18	1511.7	7.0301	<0.0001	312.5	9.3217	0.5941	4.4
		3496.41	1783.99	6.52556	<0.0001	381.1	9.70512	0.5256	7.5
		5209.52	1147.63	10.8099	<0.0001	164.9	6.78168	0.7087	3.3
		5403.15	1046.09	11.3274	0.00126752	143.7	4.4432	0.7127	2.2
		4670.68	1136.11	9.60376	<0.0001	182.2	9.57181	0.6943	3.5
		3027.69	1221.28	5.91269	0.000402139	299.4	3.62913	0.5895	4.1
		19451.9	1127.4	44.5811	<0.0001	41.16	24.0699	0.7943	2.3
		4412.07	1180.18	9.06791	0.000277217	196	11.8638	0.6541	3.9
		8406.01	1459.62	17.8606	<0.0001	129.4	21.1075	0.7442	4.5
		43054.1	983.145	96.3144	0.0450489	16.9	3.16564	0.8269	1.1
		35739.9	935.734	78.2226	0.0431181	19.64	4.19921	0.811	0.77
		10694.6	1858.39	23.0318	0.000123285	127.8	11.4469	0.7435	2
		2783.88	1420.12	5.39908	<0.0001	371.9	11.9689	0.5485	5.6
		1856.8	1517.73	3.2665	<0.0001	595.2	6.16869	0.3958	7
		3726.78	1141.58	7.70068	0.000292726	222.8	6.32329	0.6514	3.3
3	MMR-1 - F	3678.83	456.456	8.06126	<0.0001	90.46	5.68024	0.76	2.2
		5044.21	470.333	11.1115	<0.0001	68.11	17.9328	0.7732	2.6
		2490.14	402.94	5.33677	<0.0001	117.5	16.5465	0.7117	7.1
		3674.67	378.873	8.11484	<0.0001	74.58	8.38678	0.7598	2.4
		2150.17	352.378	4.58922	<0.0001	118.8	9.33075	0.7015	4.6
		1512.88	394.364	3.16364	<0.0001	189	7.85554	0.6664	5.4
		7618.96	389.851	17.2687	<0.0001	36.9	13.4166	0.8023	1.7
		4523.03	388.959	10.0269	<0.0001	62.08	5.78502	0.7631	2.8
		5689.12	596.924	12.3554	0.000763143	75.95	8.72551	0.7307	2.2
		12869.3	463.453	29.2131	0.0028665	25.91	5.91067	0.8008	2
		3955.83	503.734	8.75007	<0.0001	90.85	18.5891	0.7375	4.6
		3010.23	428.184	6.82761	<0.0001	99.92	16.3024	0.7549	3.8
		31512.9	453.031	72.6128	0.00458785	10.29	10.5242	0.8197	0.88
		2956.06	557.099	6.37381	<0.0001	134.7	11.929	0.6951	4.3
		1911.3	375.874	4.04454	<0.0001	141.6	11.9677	0.6755	5.3
		4276.7	566.398	9.33424	0.00159696	94.58	6.70421	0.7151	3.8
		6957.05	423.058	15.675	<0.0001	43.32	10.7068	0.7687	2.8
		3691.4	583.892	8.02067	<0.0001	112.8	6.18864	0.7049	2.8
		6590.23	407.725	14.9014	<0.0001	44.19	7.46527	0.7802	2.5
		1722.52	432.763	3.60423	<0.0001	179.8	6.93333	0.6443	3.3
		5303.72	372.087	12.182	<0.0001	48.99	19.1148	0.7672	3.1
		3773.72	413.698	8.46195	<0.0001	78.03	11.0696	0.7581	3
3	MMR-1 - G	15234	909.885	33.4839	<0.0001	43.69	23.0726	0.7718	2.3
		9635.52	905.874	21.5546	<0.0001	67.14	11.1813	0.76	1.8
		5143.46	1062.33	10.9599	<0.0001	148.6	17.4597	0.6856	3.9
		23044.2	958.273	53.3235	<0.0001	29.24	20.8566	0.7937	1.6
		16409.1	891.944	38.1463	<0.0001	38.22	14.1312	0.8024	1.1
		19873.6	818.404	46.8055	<0.0001	28.63	16.4118	0.8058	1.2
		2615.32	973.955	5.32443	<0.0001	259.6	7.31196	0.5547	4.7
		11327.3	737.762	26.6461	<0.0001	44.91	15.4154	0.7878	2.6
		3496.44	782.741	7.55383	<0.0001	156.5	6.32169	0.6592	3.3
		13667	828.23	31.8112	<0.0001	42.35	12.4673	0.7933	1.7
		50110	740.972	119.685	<0.0001	10.25	8.26151	0.8274	0.86
		27418.3	626.129	65.3911	<0.0001	15.71	19.2294	0.8097	1.7
		40547.7	945.303	95.7421	<0.0001	16.29	16.6383	0.8199	1
		3837.03	890.368	8.48373	<0.0001	160.7	11.5027	0.6835	2.5
		3944.38	1042.14	8.59587	<0.0001	182.6	9.21991	0.6552	3.4
		32736	829.967	75.8926	<0.0001	17.86	27.7947	0.8005	1.4
		84207.6	346.718	205.345	0.000399207	2.808	11.4986	0.8351	0.96
		78449.9	293.053	189.143	0.000222203	2.569	10.5839	0.8296	0.82
		19475.2	894.451	45.8613	<0.0001	31.95	18.5484	0.8064	1.7
		61775.2	221.819	148.665	0.00011103	2.473	17.4994	0.8287	0.96
		10403.3	1064.02	23.6084	<0.0001	72	20.2665	0.7598	3.2
		67515.6	393.068	158.78	0.000102145	4.096	9.26247	0.8254	0.8
		36589.8	291.332	87.952	0.000178355	5.499	5.30598	0.832	0.94
		22001	280.965	52.0874	<0.0001	8.927	21.565	0.8259	0.98
		48608.2	338.23	117.945	0.000100896	4.765	11.1933	0.8337	0.82
		14125.2	324.018	34.3608	<0.0001	15.51	21.4904	0.8145	1.4
		46559.5	266.336	108.153	0.000165917	4.086	17.7351	0.8306	1
4	MMR-1 - K middle	566.99	509.516	2.25889	<0.0001	311.818	10.672	0.5126	10
		1067.5	294.985	4.68168	<0.0001	96.6184	7.97759	0.6863	4.6
		656.295	402.133	2.73617	<0.0001	214.225	6.3534	0.5988	5.5
		1049.97	327.618	4.57393	<0.0001	111.719	15.4583	0.7164	8.2
		705.379	439.373	2.87597	<0.0001	219.01	13.4119	0.5714	9.6
		1484.45	307.29	6.81648	<0.0001	70.7214	15.7955	0.7266	6.5
		488.048	501.646	1.86847	<0.0001	353.107	10.1279	0.4352	10
		570.836	293.904	2.47649	<0.0001	176.429	15.1425	0.6323	7.4
		737.611	410.68	3.10158	<0.0001	192.271	11.986	0.5926	6.8
		510.891	348.495	2.19295	<0.0001	233.536	12.0429	0.6125	15
		1056.79	446.147	4.63473	<0.0001	146.263	8.41833	0.6699	5.6
		487.871	389.269	2.01748	<0.0001	278.707	10.3469	0.5836	7.7
		1060.4	495.427	4.61411	<0.0001	162.311	9.69942	0.6611	5
		685.615	347.224	2.92097	<0.0001	177.274	14.2313	0.6378	8.3
		697.847	514.769	2.81344	<0.0001	257.732	12.8615	0.5426	6.8
		581.139	301.479	2.43958	<0.0001	181.357	14.2165	0.6104	11
		1426.21	479.636	6.16658	<0.0001	118.878	22.7211	0.6803	6.8
		557.328	274.56	2.30646	<0.0001	174.004	18.7886	0.6036	9.3
		580.11	498.796	2.41284	<0.0001	291.715	12.0081	0.5454	6.6
		834.261	335.592	3.79727	<0.0001	137.495	21.5272	0.7118	5.5
		549.438	379.325	2.28935	<0.0001	239.006	13.1691	0.5813	11
		638.481	395.159	2.74337	<0.0001	207.857	10.5569	0.5823	7.6
		914.284	331.981	4.06971	<0.0001	122.926	10.8799	0.6556	5.5
		823.882	294.007	3.6608	<0.0001	123.548	14.0706	0.6917	5.7
3	MMR-1 - L base	4461.93	919.155	10.4519	<0.0001	136	21.3322	0.7017	3.9
		1993.93	910.892	4.30461	<0.0001	301.4	10.0366	0.5608	5.4
		2733.91	375.892	6.44488	0.000228336	90.73	13.7001	0.7117	5.4
		3001.2	1096.36	6.67672	<0.0001	240.7	11.2025	0.6081	4.8
		2148.45	739.782	4.73211	<0.0001	226.8	11.3592	0.5908	5.8
		6378.81	465.144	15.8669	<0.0001	47.73	9.93915	0.7949	2.5
		2217.48	993.759	4.78103	<0.0001	294.3	9.31181	0.5508	5.4
		6342.17	796.021	15.7249	<0.0001	79.27	25.2037	0.7235	3.1
		9866.17	815.643	24.3152	<0.0001	54.21	12.2104	0.7813	1.7
		2035.66	1025.14	4.37455	<0.0001	331.5	12.6562	0.5495	7.3
		2044.91	561.733	4.83337	<0.0001	175.1	17.2894	0.6553	4.8
		13502	542.09	34.7182	<0.0001	25.47	22.465	0.7989	2
		1406.42	1211.27	2.65195	<0.0001	559.6	6.35334	0.3317	4.9
		2684.87	1007.52	6.19364	<0.0001	242	9.42186	0.6336	5.1
		2964.66	1096.33	6.67575	<0.0001	237.4	15.0678	0.585	7.8
		2056.8	1115.82	4.37532	<0.0001	351.4	8.5946	0.5072	5.8
		3763.76	488.253	9.00291	<0.0001	83.73	20.3988	0.6981	4.8
		2249.94	951.513	4.93544	<0.0001	272.5	14.4288	0.5478	6.5
		3571.2	340.695	8.67655	<0.0001	61.86	9.15979	0.7344	3.5
		3127.8	742.32	7.38478	<0.0001	152.2	17.8804	0.6635	4.5
		4008.81	816.641	9.63185	<0.0001	130.3	15.0489	0.6897	4.8
		3671.56	606.508	8.95027	<0.0001	106.1	19.4472	0.7225	4.2
		7738.54	496.418	19.5983	<0.0001	40.75	11.5422	0.7728	2.2
		4496.56	1010.66	10.4223	<0.0001	143.6	24.1913	0.6253	8.9
		3101.83	1282.6	6.9748	<0.0001	263.5	16.4276	0.5705	6.8
		1418.24	1020.42	2.87627	<0.0001	456.1	8.81755	0.4012	11
		2658.35	1023.17	6.1639	<0.0001	243.4	15.6368	0.6088	6.2
		3697.46	1002.24	8.80128	<0.0001	171.1	10.9766	0.6503	4.1
		5455.2	452.373	13.9955	<0.0001	51.79	15.2836	0.7654	3.6
		1039.79	770.505	2.00937	<0.0001	471.5	6.19109	0.3368	13
		1788.16	692.508	3.9876	<0.0001	247.4	13.5819	0.5608	6.3
		3374.65	867.195	7.80708	<0.0001	164.8	13.8727	0.6291	8.3
4	MMR-1 - L base	2760.31	459.565	13.0195	0.000114232	55.64	9.83162	0.7354	3
		46781.6	325.87	232.54	0.000568005	2.316	14.2951	0.8237	1.1
		82219.4	317.408	411.321	0.000856042	1.282	3.5101	0.8333	0.84
		3563.08	321.829	17.2619	0.000132265	30.44	12.8944	0.8005	4.9
		4844.83	339.031	24.2008	0.000134527	22.84	5.29309	0.7974	2.2
		118976	546.19	603.704	0.000438425	1.509	5.76469	0.8409	0.76
		1860.94	320.431	8.85534	<0.0001	56.53	6.17292	0.7191	3.9
		643.22	274.611	2.88176	<0.0001	140.3	7.38456	0.6159	9.2
		541.626	500.165	2.28419	<0.0001	302.7	5.10608	0.5125	8.5
		724.519	342.43	3.23634	<0.0001	155.5	6.22234	0.6131	6.5
		2282.06	576.93	11.275	<0.0001	82.22	11.3281	0.7705	3.7
		651.177	193.12	3.05296	<0.0001	97.35	9.58094	0.6924	6.2
		1683.95	450.036	8.04455	0.000167028	87.41	13.1758	0.7195	3.7
		2260.48	336.502	11.059	0.000229544	49.22	10.9497	0.783	3.5
		511.365	481.587	2.10336	<0.0001	314.9	11.398	0.5044	13
		1456.48	361.511	7.27886	<0.0001	78.57	25.02	0.742	3.5
		24847.2	638.971	126.497	<0.0001	8.401	7.92423	0.8353	1
		5026.18	505.309	25.566	0.000137859	32.48	15.1906	0.8124	2.3
		2373.77	388.124	11.7017	<0.0001	53.65	6.83519	0.783	3.6
		865.678	412.997	3.98751	0.000386159	156.9	11.9384	0.6645	6.4
		6620.19	325.36	33.2045	<0.0001	16.1	5.69735	0.8118	2.5
		2461.74	325.597	12.4008	<0.0001	42.66	2.93651	0.7911	3.4
		1678.83	271.073	8.30644	<0.0001	52.61	8.0678	0.7768	5.1
		636.328	648.136	2.61966	<0.0001	328	7.16239	0.4473	11
		2564.49	527.36	12.4831	<0.0001	67	17.4585	0.7464	4.4
		3757.12	587.746	18.8025	<0.0001	50.46	7.31472	0.7789	2.5
		109777	412.464	570.996	0.000609055	1.202	14.5712	0.8368	1
		8072.01	290.434	41.271	0.000453486	11.62	7.39619	0.8222	1.7
		123452	414.125	632.306	0.00039164	1.089	9.9285	0.8353	0.94
		2723.87	673.222	13.3977	<0.0001	79.45	7.24209	0.741	3.8
		689.253	367.035	3.22234	<0.0001	170.5	9.80982	0.6442	5.2
		31427.4	663.983	163.427	<0.0001	6.756	27.0264	0.835	1.3
		1578.2	475.67	7.85346	<0.0001	95.46	6.04486	0.7352	4.9
		4295.46	368.863	22.0953	<0.0001	27.33	8.533	0.8056	2.4
		124803	225.57	652.761	0.000545219	0.5748	4.23878	0.8356	0.81
		933.348	226.376	4.63747	<0.0001	77.34	12.7276	0.7446	2.8
		16727.2	446.034	87.3556	<0.0001	8.432	3.32136	0.8219	1.4
		31576.1	338.434	166.631	0.000185177	3.373	7.45443	0.8323	0.92
		25212	321.699	134.519	0.000298556	3.983	24.5178	0.838	1.3
		3289.13	546.236	17.151	<0.0001	51.62	12.7107	0.7867	3.9
		72597.4	388.435	381.379	0.000926666	1.688	5.91781	0.8292	0.83
		129937	484.569	835.865	0.003687	0.9557	59.7297	0.8186	2.4
		1866.4	485.406	9.28609	<0.0001	81.51	20.3404	0.7158	7
		1269.46	411.567	6.25084	<0.0001	101.3	16.3142	0.6918	3.3
		1859.05	519.854	9.12936	<0.0001	88.32	14.1942	0.7064	3.3
		944.795	271.282	4.56788	<0.0001	91.72	15.3545	0.6988	5.9
		385.32	328.058	1.68899	<0.0001	265.2	3.65387	0.4931	9.5
		808.712	121.424	4.08283	<0.0001	47.04	8.77906	0.7418	5
2	MMR-13 - N	5429.26	1759.79	17.4152	0.00524087	163.4	3.73127	0.7823	2.5
		3518.12	1754.17	12.2495	0.00358106	231.1	4.16643	0.7782	3.2
		4462.05	1814.76	15.6615	0.00506784	187.1	9.32936	0.7792	2.1
		10475.1	1863.82	36.9765	0.0050223	82.19	10.8984	0.7979	1.4
		5397.87	1907.62	16.3606	0.0116664	188.1	8.47012	0.778	2
		7452.49	1858.05	26.3558	0.0103741	114.1	8.01872	0.7843	1.5
		4759.62	1855.86	17.0624	0.00426671	175.7	6.0345	0.7805	3.1
		5757.71	1806.87	19.8933	0.00716232	147.6	4.17622	0.7919	1.6
		7959.62	1897.34	27.1601	0.00963395	114.4	2.47688	0.8053	1.9
		4073.85	1985.74	14.816	0.00405332	215.8	5.91029	0.7743	2.4
		5842.36	1896.86	17.8149	0.00446667	173	7.23132	0.7913	1.9
		7340.92	1741.89	23.8346	0.0105836	119.1	5.03911	0.7969	1.8
		5878.37	1858.87	21.2801	0.00655717	142	4.14253	0.7927	1.6
		6490.16	1992.83	21.4376	0.00508045	151.4	9.00863	0.7961	1.4
		11875	1863.83	40.5586	0.0128217	75.49	9.30095	0.8119	1.5
		9483.56	2354.2	30.0801	0.0104444	126.8	3.95981	0.7861	1.3
		4803.25	1940.76	14.2781	0.00507387	219.1	7.35381	0.7761	2.7
		8530.39	1975.18	31.2678	0.00639789	103.8	12.9912	0.8123	1.4
		6933.65	1763.77	23.6439	0.0245125	121.1	2.78022	0.7901	2.3
		6409.16	2073.15	12.2257	0.00350324	270.8	5.05853	0.759	2.8
		7862.99	2281.88	26.5794	0.0101948	138.9	5.12509	0.7833	1.6
		8094.09	1909.65	24.6283	0.0254177	125.7	6.20382	0.7871	2.2
		18036.9	2071.18	60.6656	0.0268704	56.03	5.85383	0.8101	1.3
		13008.9	1980.43	44.5621	0.00927907	73.17	9.97932	0.816	2.7
		6288.63	1865.13	22.1087	0.0150004	136.9	3.93687	0.789	3.2
2	MMR-13 - O	91459.5	230.232	298.777	0.839297	1.271	2.41405	0.8193	0.67	X
		17421.6	895.582	58.7342	0.0375536	23.75	5.58241	0.7137	1.4	X
		10117.1	1128.77	32.141	0.0122394	57.21	8.51651	0.7962	1.2
		17409.6	1197.1	51.7021	0.0270869	37.7	3.93825	0.7954	1.6
		24575.8	1165.35	81.3192	0.0300795	23.65	3.68913	0.8205	0.91
		29504.6	1179.27	88.636	0.0385229	21.89	2.77681	0.8146	0.75
		33208.2	1297.38	112.068	0.0496687	19.1	2.43838	0.8204	0.99
		29261.3	1237.38	93.4997	0.0457702	21.8	4.0587	0.8166	0.77
		47447.9	1384.36	155.828	0.0564844	14.68	2.92898	0.8234	0.71
		39540.9	1357.81	125.439	0.0514883	17.83	2.78832	0.8171	0.77
		26695.8	1268.65	75.4625	0.0383781	27.74	5.40377	0.82	1
		18287.2	1207.72	60.1832	0.0556625	32.86	6.59832	0.8058	1.6	X
		19895.3	1062.98	62.2486	0.0529478	28.04	4.39102	0.8108	1.2
		26651.9	1024.92	67.7666	0.0717519	24.94	4.52115	0.819	1.3	X
		16656.5	1160.82	53.8791	0.0388941	35.33	7.17073	0.8085	1.4
		17591.8	1159.85	60.5388	0.041036	31.43	7.85874	0.8096	1.7
		24853.6	1134.96	76.4223	0.0430057	24.37	4.35954	0.8097	1.1	X
		16885.7	1077.87	51.9205	0.0567078	33.84	4.79775	0.7974	0.95	X
		15147.8	1237.73	51.9229	0.0397096	38.74	2.53099	0.7915	1.2	X
		22987.9	1186.74	71.0665	0.0509642	27.45	3.67997	0.813	1.1
		20143.5	1244.77	62.2961	0.0472579	32.81	3.04061	0.811	1.1
		14506.3	1277.98	51.9223	0.0330908	40.2	7.89309	0.8011	1.2
		13261.1	1203.88	43.7668	0.039761	44.7	3.48761	0.7913	1.4
		14831.9	1189.32	47.8843	0.040936	40.53	4.52964	0.7992	1.1
		11679	1218.35	42.7125	0.0442514	46.53	4.9873	0.7988	1	X
		16339.5	1107.2	50.8327	0.0356035	35.83	3.47296	0.8144	0.95
		19150.6	1029.53	63.5683	0.0456902	26.54	5.72873	0.807	1.3
		15870	1242.07	53.9112	0.0347962	37.81	3.12435	0.8101	1
		18702.2	1281.08	57.1101	0.0377539	36.8	10.1099	0.8094	1.1
		15331.5	1169.44	50.7687	0.033921	37.77	7.46249	0.8083	1.6
		11593.3	1286.47	34.9551	0.020673	60.12	6.22815	0.8012	1
		11659	1202.05	39.1832	0.0310099	49.81	2.76567	0.79	1.4
		16280.6	1039.18	51.0511	0.0430595	33.23	4.195	0.8001	1
		18796.9	1268.89	41.3025	0.0295116	50.29	4.80159	0.8051	0.94
		21887.6	1256.26	68.5621	0.0557576	30.03	5.02251	0.8075	1.3
		14733.8	1123.51	49.6197	0.0510449	36.86	2.37269	0.7946	1.6	X
		19493.2	1051.57	66.0157	0.0611142	26.06	3.33121	0.8043	1.1	X
		13689.6	1265.9	47.0416	0.032529	43.89	5.39932	0.7982	1.2
2	MMR-13 - P	6535.51	492.572	20.1288	0.000393915	39.81	16.6338	0.7936	3
		6419.28	786.993	20.6864	0.00302637	60.93	8.57071	0.7645	2.1
		204249	400.922	639.618	0.298414	1.05	1.71672	0.8495	0.54
		25591.9	233.779	81.0401	0.0900282	4.794	2.47353	0.8339	1.8
		296244	580.722	915.81	0.376703	1.06	3.51159	0.8447	0.54
		9720.28	338.165	30.2201	0.0281998	18.53	2.84097	0.8267	2.2
		4329.65	508.503	11.9105	0.00058827	68.18	16.2756	0.7592	3.9
		7436.38	305.922	23.4151	0.0384268	21.56	5.24825	0.8208	2.5
		4610.07	859.952	15.3047	0.00202306	88.34	13.0356	0.7307	4.9
		2250.58	300.837	7.53458	0.00423482	63.4	9.96935	0.7487	9.4
		2453.21	432.633	7.49202	0.000455561	89.65	20.5548	0.708	7.9
		1470.13	517.951	4.43988	0.000520031	173.9	17.5256	0.6366	11
		2132.05	510.462	7.00054	0.00020072	114	5.59516	0.7208	3.1
		3555.41	353.112	11.6661	0.000371133	48.72	4.31635	0.7736	3
		1670.53	689.721	5.8648	0.00137423	179.3	12.099	0.6762	4.5
		2211.81	771.943	8.31188	0.00103605	144.5	9.80564	0.7118	5
		3027.11	513.435	9.95962	0.000438798	82.03	13.1483	0.7527	4.6
		5185.75	626.497	17.1966	0.00103225	58.56	4.91575	0.7711	2.4
9	MMR-30 - C base	6993.53	565.201	46.0149	0.0002142	20.06	2.8767	0.8008	2.4
		703.627	866.488	5.84046	<0.0001	212.7	6.24421	0.5711	8.1
		1785.03	322.983	11.0123	0.000401987	46.54	5.53539	0.7475	3.4
		885.288	674.284	5.87974	<0.0001	169.4	4.82219	0.6215	4.8
		3139.08	526.005	4.85425	<0.0001	161.9	8.96456	0.6409	7.3
		1631.75	477.487	11.1413	<0.0001	68.33	4.12416	0.7562	5.4
		3465.7	456.289	23.5544	<0.0001	31.51	4.0302	0.7934	3.6
		3434.56	615.401	23.8142	0.000175331	41.58	3.40391	0.7731	2.9
		1056	812.466	8.11234	<0.0001	150.3	4.76184	0.6489	7.1
		9019.25	727.453	59.7566	<0.0001	19.9	3.1572	0.8023	1.6
		4837.08	890.639	33.6974	<0.0001	42.71	5.51113	0.781	2.2
		7719.39	686.758	50.4456	<0.0001	22.31	4.60679	0.8072	2.4
		3750.24	992.663	26.0451	<0.0001	60.88	5.3517	0.7597	3.4
		2577.36	733.947	18.0174	<0.0001	65.69	4.86695	0.7773	3.3
		2487.8	948.436	18.0464	<0.0001	82.16	4.13766	0.7206	2.9
		3837.1	721.437	26.2224	0.000438739	44.92	3.42285	0.8002	4.8
		3550.33	741.331	25.5937	<0.0001	46.52	2.91137	0.7695	1.8
		405.645	985.789	3.80804	<0.0001	351.3	6.77472	0.4835	9.4
		3253.69	967.105	23.0589	<0.0001	67.07	2.23751	0.7616	3
		1891.98	762.096	13.7953	<0.0001	87.55	3.59365	0.7451	3.9
		1457.48	723.486	10.619	<0.0001	108	6.0477	0.745	5.9
		2608.49	1180.85	19.478	<0.0001	93.74	4.97915	0.7009	3.8
		3670.01	1109.76	26.3453	<0.0001	66.51	8.80117	0.7385	2.1
		14615.8	1142.62	99.9469	<0.0001	18.81	2.8264	0.8149	1.4
		6273.76	1221.3	43.3301	<0.0001	45.45	4.64803	0.7771	2.8
		875.089	1165.36	6.98721	<0.0001	238	4.36864	0.5637	5.6
		381.073	729.065	3.28584	<0.0001	302.9	4.87469	0.4924	3.1
		196.518	1583.15	3.15691	<0.0001	573	5.48264	0.2365	11
		347.598	1125.73	3.0585	<0.0001	453.8	8.82905	0.3406	10
		2409.22	1021.89	17.1584	<0.0001	92.85	4.9516	0.7156	2.9
		2160.95	878.749	15.4096	<0.0001	89.8	8.31797	0.7337	4.1
		745.772	1535.3	6.75341	<0.0001	310.5	5.37213	0.4931	8.7
		2717.17	1089.43	19.7063	<0.0001	88.45	6.82149	0.7626	3.3
		1638.73	1021.8	12.6712	<0.0001	123.4	6.57324	0.6829	4.3
		756.67	960.751	5.08554	<0.0001	269.3	8.7319	0.5618	8.8
		1728.93	1114.22	12.0359	<0.0001	143	7.27321	0.6993	7.5
		989.373	1320.24	8.39888	<0.0001	223.9	6.59953	0.5606	8.7
		871.289	1160.42	7.01054	<0.0001	239	6.09765	0.5833	3.5
		740.41	863.402	6.14567	<0.0001	205.9	8.22897	0.6084	8.3
		1674.73	995.26	12.1493	<0.0001	127.9	7.53621	0.7181	7.2
May	MMR-31 - E	5890.21	1468.97	27.6411	0.00293656	87.2121	7.86138	0.810633	0.311884
		12621	1869.01	54.7176	0.0245588	56.0838	2.68626	0.81166	0.612268
		14962.7	1654.89	16.5451	0.00334484	162.685	4.20378	0.79388	0.418719
		7895.54	1395.35	39.9894	0.00594636	57.5432	2.14287	0.81995	0.315293
		7249.64	1892.01	27.3732	0.00659348	112.807	5.03632	0.800327	0.931084
		6852.87	1485.49	28.7692	0.00431419	84.6774	4.66568	0.809363	0.416272
		4653.17	1569.36	21.1349	0.00404551	121.605	2.79653	0.806766	0.487799
		46989.9	1019.87	226.054	0.0179429	7.49381	2.17128	0.833596	0.607917
		8613.46	1858.41	41.2889	0.00721387	73.5556	6.13776	0.802785	0.38476
		59389.3	882.767	272.067	0.00776086	5.38481	2.2583	0.831967	0.590103
		5147.78	1485.04	21.6779	0.00155244	112.161	2.57371	0.8063	0.298961	X
		21835.7	547.622	130.396	0.0122437	6.94016	4.25968	0.823873	0.425593	X
		3114.27	1743.12	14.8202	0.00435512	191.247	4.61394	0.793347	0.632297
		3241.96	1796.15	17.4691	0.00436854	166.917	4.76087	0.790364	0.820515
		11125.6	2930.99	51.9229	0.0158245	92.0583	2.53418	0.798888	0.985927	X
		4559.51	1695.8	23.9218	0.00568684	116.257	7.44308	0.809407	0.699739
		5857.04	1555.06	29.6437	0.00415614	86.2733	4.0229	0.814732	0.245145
		6199.47	1532.52	27.7185	0.00415382	90.8973	5.38622	0.814094	0.266611
		19952.3	4058.42	105.505	0.0190994	63.0964	2.87681	0.80978	0.225786	X
		14367.3	2765.33	75.5146	0.017366	60.0233	2.68512	0.808401	0.540219	X
		11442.5	2689.68	57.3578	0.0212707	76.6077	2.35367	0.80216	0.48536	X
		14936.6	4837.51	80.3344	0.0110545	98.0334	3.97934	0.795635	0.527655	X
		12166.7	5024.16	55.0291	0.00997243	148.667	4.03253	0.796019	0.503433	X
		9623.64	4214.74	46.5105	0.0144409	146.923	1.84335	0.787965	0.34701	X
		24870.1	4620.34	81.76	0.0177105	92.1735	2.54076	0.799173	0.415735	X
		16761.7	3489.33	84.4446	0.0116223	67.7653	1.65839	0.80941	0.516979	X
		30148.5	4562.58	140.374	0.0153253	52.1205	2.81959	0.767529	0.426568	X
		12776.3	3949.35	57.9706	0.00723755	111.345	3.89051	0.80297	0.221127	X
		17346.2	3844.58	85.0651	0.0117866	74.1549	2.2515	0.810301	0.285411
		11825.6	4187.21	50.1064	0.00820887	135.758	7.26181	0.791675	0.391867
		8324.08	1600.34	44.0953	0.0136703	59.4627	2.84773	0.807616	0.408294
		7630.98	1477.3	29.0178	0.00475214	83.4366	4.56173	0.80817	0.485287
		10906.2	4670.44	57.7283	0.00695626	130.071	2.85578	0.772321	0.380192	X
		10701.1	4443.95	55.9312	0.00838651	127.557	4.91436	0.769673	0.442293	X
		7909.14	1536.31	34.5079	0.00849606	72.8375	5.72815	0.804886	0.431545
		17126.6	4037.44	97.4296	0.0163336	65.507	1.5205	0.741338	0.561712	X
		20836.5	2828.07	112.139	0.0105773	41.4032	1.34723	0.811431	0.367689
		14793.8	3343.76	58.2601	0.00763622	93.4398	2.61902	0.7957	0.33241
		8725.47	5325.23	47.0996	0.00342391	183.153	2.6675	0.786347	0.365085
		9451.35	4404.37	51.2306	0.00493162	139.469	3.37416	0.789052	0.514947
		5776.4	1555.81	28.4402	0.0120567	89.2944	4.89928	0.800589	0.393905
		5598.31	1398.62	29.9331	0.00340194	76.6733	1.76923	0.810541	0.321005
		8869.39	1790.4	47.0756	0.00725784	62.302	1.73678	0.807285	0.601248
		7386.41	2079.5	37.7538	0.00848356	89.8501	5.77655	0.799372	0.271764
		8412.1	3907.86	43.9641	0.00585196	144.146	1.72489	0.788355	0.272824	X
		6382.96	2481.1	34.4989	0.00575005	117.02	2.07252	0.794644	0.349754
		7801.83	1697.81	41.9757	0.00712491	66.3684	3.72187	0.810424	0.284658
		10947.9	4161.56	47.8688	0.00611184	140.972	2.62005	0.788216	0.429449
		3692.84	1411.68	19.8309	0.00508355	116.259	4.92499	0.801588	0.56638
		5611.17	1757.62	27.5996	0.00755856	103.854	5.16736	0.798862	0.47724
		9107.54	2395.4	49.4563	0.0135495	79.2093	4.12973	0.80413	0.432496
		5997.6	1433.25	32.7638	0.00556745	71.6495	3.99572	0.807021	0.269118
		9868.23	3904.3	53.8689	0.00717446	116.473	7.10563	0.7715	0.239185	X
May	MMR-31 - H1-G dark	6018.45	203.042	24.2512	0.0448033	13.7445	3.12714	0.811319	1.68472
		6482.81	156.695	26.7231	0.0012048	9.69231	2.81883	0.824337	1.42631
		2813.54	110.099	8.76971	<0.0001	20.5321	3.55559	0.804206	1.6732
		4947.22	182.953	13.6254	<0.0001	22.0416	4.81667	0.811226	1.37963
		3693.26	91.5842	15.1375	0.123345	10.0128	1.64788	0.826662	1.68205
		4722.44	133.168	19.5557	0.00636442	11.262	6.50427	0.825342	1.27017
		11875	95.8843	44.7959	0.00170785	3.54263	4.76326	0.826774	0.912855
		4375.52	148.927	15.943	0.0168281	15.299	5.5094	0.806892	1.41519
		9723.7	92.7903	39.604	0.00246979	3.8775	2.27165	0.826652	1.15048
		5062.51	154.861	21.08	<0.0001	12.1129	7.12225	0.819615	1.27972
		3100.02	100.766	12.741	0.00689745	13.0259	2.62089	0.817513	3.03368
		3380.62	70.9269	10.9584	0.00301809	10.6742	3.28684	0.820013	1.53288
		3975.4	54.9504	15.969	0.00240967	5.66924	2.85024	0.818092	1.8852
		8050.01	134.779	33.9737	<0.0001	6.57037	4.42754	0.828069	1.07234
		6844.85	66.349	28.4763	0.00243752	3.84792	8.26528	0.822652	1.35908
		8609.98	94.0291	32.547	0.0264666	4.75066	10.5527	0.814479	1.53669
		7841.09	114.597	29.9475	0.00192713	6.31003	5.13128	0.819778	1.13053
		2765.21	110.459	12.0857	<0.0001	15.0126	3.92693	0.812405	1.83906
		7416.3	248.295	19.8576	0.00596273	20.4772	3.16972	0.806781	1.38071
		15766	266.977	48.679	0.00986144	9.0111	8.92594	0.812929	0.951822	X
		3849.24	228.345	13.2141	0.0015608	28.2664	8.00251	0.80455	1.31624
		3496.87	286.804	11.0559	0.00202176	42.2591	7.04313	0.796831	1.80541
		4562.73	136.874	33.674	0.0114365	6.72707	3.84562	0.826694	1.06374
		1684.71	617.375	6.59965	0.00233203	145.546	5.18189	0.712679	1.79046
		1958.36	272.633	7.99799	0.0128137	55.0851	3.62744	0.781818	1.88539
		2090.04	163.9	6.23685	0.0146297	42.712	3.62907	0.79254	1.92975
		4354.97	453.648	14.0735	0.0153918	52.2464	6.5648	0.787408	1.14463
		1214.69	553.686	5.67221	0.00622491	153.101	4.90478	0.727137	2.6668
		2185.7	430.994	8.70951	0.00543399	79.635	6.87775	0.774088	1.56674
		9178.88	246.039	39.1336	0.00654669	10.3774	4.55313	0.821602	1.16851
		12609.5	149.72	52.8337	0.0122874	4.6952	4.59304	0.828825	0.755784
		5357.27	202.424	29.5205	0.00392994	11.317	4.15257	0.821417	0.955585
May	MMR-31 - I top-J top	750.444	490.97	2.89816	<0.0001	252.377	3.31233	0.636657	3.86691
		106.913	306.219	0.704246	<0.0001	542.815	4.79203	0.35903	6.4104
		432.815	306.048	1.85141	<0.0001	247.033	6.61681	0.641992	5.34811
		2282.23	473.183	8.40803	<0.0001	90.5253	8.68159	0.773273	2.01123
		3755.76	398.95	14.4938	<0.0001	44.8929	3.34218	0.799032	1.31681
		4622	459.015	18.1027	<0.0001	41.3559	6.51662	0.799091	1.46187
		145.943	293.295	0.89436	<0.0001	436.801	5.2285	0.455165	11.8333
		2721.92	213.836	6.7828	<0.0001	50.8391	12.4169	0.777924	1.97605
		2783.39	176.48	6.76159	<0.0001	42.9159	8.08662	0.81434	2.05016
		7006.94	202.716	25.3084	<0.0001	13.2422	6.26963	0.824669	0.847788
		1172.15	205.378	3.95293	<0.0001	82.6147	5.79212	0.752041	2.92802
		1245.55	282.055	3.50072	<0.0001	126.744	9.53775	0.732474	3.96876
		956.367	277.683	3.80521	<0.0001	114.55	13.6443	0.728624	3.45006
		1121.51	237.251	4.06009	0.00195082	92.3734	3.69336	0.741345	2.88906
		1633.24	201.374	6.44613	<0.0001	50.6035	5.13178	0.786268	1.74288
		533.248	265.717	1.66753	<0.0001	237.574	4.82027	0.637972	5.69856
		1227.72	423.04	3.68436	<0.0001	176.917	9.79915	0.695368	3.21646
		4000.37	340.093	16.492	<0.0001	33.8068	7.12102	0.808725	1.81949
		7855.3	219.245	34.5595	<0.0001	10.535	1.74475	0.83316	1.07719
		997.189	98.6189	3.47746	<0.0001	45.3578	11.5097	0.762733	3.67741
		1135.69	124.556	3.18215	<0.0001	63.4264	3.38793	0.786912	2.46329
		850.381	215.512	2.46814	<0.0001	134.893	11.5742	0.700014	2.93812
		1354.67	296.433	5.35479	<0.0001	89.5148	5.48724	0.782994	3.09712
		22519.8	107.676	79.8492	0.00157533	2.23301	8.3315	0.827765	0.683481
		1068.53	259.013	2.96725	<0.0001	137.624	14.738	0.736553	2.54451
		874.235	368.921	3.39979	<0.0001	164.804	7.19733	0.66999	4.09214
		158.935	453.686	0.973446	<0.0001	576.406	3.54667	0.345673	9.06174
		2057.3	388.479	7.36961	<0.0001	84.9824	3.34695	0.777414	2.08021
		5499.99	484.535	21.5879	<0.0001	36.6607	4.05486	0.801825	1.34128
		1119.68	398.249	4.69983	<0.0001	133.477	7.76603	0.734914	4.12719
		2029.17	594.875	8.67799	<0.0001	109.437	5.06125	0.759357	1.85998
		1458.15	103.693	4.58613	<0.0001	36.5334	3.1081	0.781607	2.35465
		1601.94	194.259	6.61921	<0.0001	47.31	8.87852	0.777291	2.69994
		707.596	262.338	3.07907	<0.0001	133.075	5.05736	0.719619	3.60234
		282.064	586.154	1.52317	<0.0001	499.303	4.16856	0.415513	7.40406
		804.918	318.501	3.20333	<0.0001	154.927	11.939	0.71534	2.55588
		2839.57	460.012	11.5914	<0.0001	64.0888	3.32828	0.780591	2.0066
		706.305	495.542	2.92549	<0.0001	253.896	4.81654	0.647168	4.17498
		2273.75	311.399	9.15225	<0.0001	55.1783	4.56769	0.788429	1.94564
		1147.11	421.515	4.60934	<0.0001	141.42	5.6424	0.701849	3.86449
		4150.28	528.607	15.5391	<0.0001	55.1575	2.87121	0.78808	1.59683
		525.306	208.472	1.63697	<0.0001	191.362	7.23286	0.651438	3.85896
		448.796	203.751	1.40605	<0.0001	218.56	8.00984	0.657907	3.95162
		672.751	445.486	2.96916	<0.0001	223.911	10.1301	0.639641	5.82775
		247.381	540.664	1.57113	<0.0001	459.957	3.15031	0.460502	4.07094
3	MMR-31 - N base-O base	4103.55	501.864	10.0422	0.0122932	77	5.21556	0.6946	3
		3546.97	187.155	8.94312	0.0073306	33.19	7.88479	0.7468	2.3
		2364.15	481.854	5.6445	0.00203931	129.2	8.31315	0.6625	4
		4423.98	312.62	11.2181	0.0101477	43.87	12.8865	0.7329	4.1
		2391.67	541.213	5.76299	0.00142735	141.9	7.01789	0.6597	4.2
		9330.65	91.7214	25.2141	0.106437	5.851	13.16	0.7724	2.5
		3374.35	171.366	8.58051	0.0206488	31.8	4.45017	0.7538	4.1
		4374.34	248.157	11.0018	0.0231858	35.43	5.18076	0.7292	3
		2819.7	468.166	6.99533	0.00517137	103.4	5.53101	0.699	5.5
		2709.38	445.614	6.70438	0.000890434	102.5	13.8717	0.6954	4.8
		3138.83	387.131	7.85089	0.00218617	76.86	4.35517	0.7151	2.9
		3866.09	159.651	9.85191	0.00965162	25.64	4.56839	0.7426	2.8
		12623.6	605.189	32.6328	0.0261295	29.53	11.3024	0.7539	2.9
		3098.91	649.82	7.59184	0.00998867	129.4	5.99693	0.661	3.4
		3568.55	450.457	8.96069	0.00456804	78.54	9.97125	0.7193	3.3
		20044.1	151.452	51.8038	0.173746	4.704	4.02613	0.773	1.2
		3778.51	559.377	9.47772	0.0180075	91.43	6.15992	0.7041	1.9
		3494.42	65.8922	9.09564	0.0300985	11.64	9.05516	0.7706	2.6
		1557.93	493.527	3.46453	0.00131979	207.7	10.8553	0.5991	6.9
		7024.45	480.214	17.9907	0.0242847	41.94	8.55447	0.7297	6.1
		1177.3	401.086	2.89349	<0.0001	203.5	12.8457	0.6113	6
		2408.94	264.691	6.19846	<0.0001	67.4	15.9307	0.7379	4.5
		2588.93	649.809	6.15532	<0.0001	157.1	21.6755	0.6337	6.1
		2317.39	323.426	5.62307	<0.0001	86.69	15.9807	0.656	11
		1121.42	715.993	2.52039	<0.0001	388.1	6.68339	0.4938	9.8
		1411.6	243.893	3.49754	<0.0001	105.7	4.74505	0.6659	5.5
		1718.44	568.469	4.17569	<0.0001	201.8	16.7655	0.6276	6.1
		738.546	627.185	1.48082	<0.0001	515.5	5.00287	0.3224	7
		934.078	672.581	1.9745	<0.0001	440.3	8.57483	0.4093	14
		1551.3	618.962	3.71683	<0.0001	242.3	13.7134	0.5961	6.8
		2496.16	308.756	6.19252	<0.0001	76.3	18.0143	0.6825	5.6
		1100.36	581.037	2.45169	0.000191632	319.1	4.85865	0.4709	4
		2447.72	917.192	5.92183	<0.0001	222.5	18.7439	0.5744	12
		4451.54	124.274	11.8753	0.0180231	16.74	16.7278	0.7619	2.5
		2568.42	547.809	6.47729	<0.0001	127	20.2793	0.6494	6.4
		2591.12	684.278	6.38622	0.000156721	154.4	19.0786	0.5793	6.7
		4080.89	191.02	10.7994	0.016941	27.86	5.67955	0.7342	3.5
		1627.5	502.399	3.97841	0.00161425	182.3	9.6378	0.5832	5.6
		1429.47	559.978	3.38605	<0.0001	234.8	21.4711	0.5556	13
		1530.56	653.618	3.7524	0.000110084	253.6	13.2448	0.597	7.2
		1710.61	76.8605	5.12798	0.000940757	23.86	17.5136	0.7534	4.9
		2519.27	681.708	6.39626	0.000162926	159.6	18.5381	0.6449	7.7
		2299.98	827.406	5.47363	<0.0001	213.4	24.7314	0.5462	14
		3309.56	189.643	8.51957	0.00204344	34.22	12.7855	0.6903	3.6
1	MMR-32 - F	2808.85	242.07	7.73909	0.00473844	49.08	3.00949	0.7273	2.9
		1228.55	707.04	3.07105	0.0010395	326.5	4.90531	0.5533	6.1
		1850.99	366.136	5.02771	0.00170589	111.6	3.4832	0.6858	5.2
		4141.33	205.636	11.7465	<0.0001	28.14	5.25761	0.7715	3.4
		681.354	389.574	1.68616	0.000605047	322	15.0624	0.5252	14
		1268.75	260.896	3.45009	<0.0001	115.6	7.5911	0.6802	5.7
		2430.51	410.109	6.89134	0.000353766	92.25	17.3491	0.7054	5
		6988.34	299.212	19.9099	0.00593323	24.11	5.65858	0.7678	2.6
		3694.03	269.372	10.5728	<0.0001	41.02	6.55624	0.7744	2.8
		1320.68	968.165	3.21873	0.000761199	410	4.33823	0.4902	9
		1091.49	491.938	2.76215	<0.0001	252.6	5.55913	0.554	6
		3571.96	392.923	10.3214	<0.0001	61.28	8.47962	0.7738	3.4
		3849.42	329.067	10.8327	0.00178014	48.08	10.3913	0.7427	3.1
		2155.27	221.814	6.09389	<0.0001	57.18	7.92651	0.7293	4.3
		2150.75	577.2	5.81653	0.00240599	148.4	5.47426	0.6419	4.3
		1005.76	352.052	2.66681	<0.0001	192.2	4.0246	0.5966	4.7
		1769.4	512.917	4.86985	0.000592145	157.8	12.6088	0.6461	5.3
		3558.67	285.489	10.5851	0.00117663	43.32	22.6823	0.7698	4
		2354.49	191.542	6.78397	<0.0001	45.2	12.6465	0.7635	5.8
		1811.18	633.052	4.89983	0.00090506	190.5	11.5114	0.6183	6.8
		2915.4	315.569	8.36974	<0.0001	59.45	5.64701	0.7359	3.7
		3388.08	300.793	9.65812	0.00149858	49.24	10.2813	0.7408	4
		1736.18	259.653	5.11084	<0.0001	80.78	10.3149	0.7513	5.9
		1369.25	599.733	3.64365	0.00102504	240	13.1217	0.5995	9.3
		2400.03	233.972	6.90032	0.00011956	53.34	10.5498	0.7319	6.2
9	MMRS-3-24-Top SP - B base	37015.7	2213.87	340.337	0.00512659	10.79	49.5213	0.8295	4.6
		1387.33	2250.02	11.0686	0.00160776	328.7	11.1429	0.782	4.7
		525445	838.278	4556.02	0.0821589	0.3074	17.0494	0.8441	0.96
		54557.3	1419.06	420.822	0.00940974	5.658	33.9454	0.8523	1.9
		136836	927.631	1161.07	0.00535322	1.336	32.9332	0.8451	1
		13694.4	2739.18	105.86	0.00437801	42.94	36.4154	0.8311	2.9
		1181.83	995.057	9.05654	0.00655164	180.4	8.32365	0.811	2.7
		1233.68	2356.78	10.6221	0.00443053	352.6	4.81353	0.7504	4
		667.717	1006.41	5.57156	0.00145741	296.3	10.6776	0.8093	6.9
		440.904	833.13	2.36702	0.00129203	551.1	9.56491	0.7233	7.1
		1071.6	2798.51	8.78806	0.00340242	510.5	6.32894	0.7662	3.3
		272288	923.809	2230.06	0.0210574	0.6893	29.9476	0.8364	1.2
		1644.43	2419.07	14.9493	0.00475692	263.1	2.97447	0.7926	4.4
		9319.17	5709.54	42.605	0.016007	221	11.7433	0.8195	1.8
		1642.87	3379.89	15.8337	0.00416654	338	10.3891	0.7436	5.1
		30972.6	2760.72	230.927	0.00196748	19.81	45.3681	0.8281	1.7
2	MMRS-3-24-Top SP - C	5879.74	707.861	26.9868	0.00465785	42.89	6.68547	0.8031	2
		3589.68	765.65	15.7796	0.00190607	79.25	3.78104	0.801	3.3
		111494	527.967	146.427	0.0276718	5.964	16.7211	0.8249	6.5
		552089	363.901	2301.98	0.27785	0.2631	7.61172	0.8367	0.7
		120782	425.083	541.422	0.106197	1.301	10.4695	0.8278	1.1
		15668.7	784.32	68.391	0.0042154	18.92	13.4519	0.8197	1.4
		86979.4	474.5	333.404	0.0291119	2.364	16.5299	0.833	0.8
		3018.78	580.665	12.3013	0.0104852	76.28	7.47459	0.781	2
		4799.48	535.249	22.018	0.0178247	40.28	4.54006	0.8282	2.1
		6987.51	1971.76	31.6703	0.0226531	100.8	6.37187	0.7837	2
		13154.2	561.187	53.2549	0.0193165	17.49	5.00332	0.8314	2
		2102.59	592.172	10.3358	0.00410919	93.2	7.66974	0.7934	3.2
		1937.12	479.34	9.13329	0.0079366	85.54	4.45856	0.7971	2.5
		29747.1	504.321	127.534	0.0475242	6.554	17.1663	0.8287	1.2
		1852.19	761.801	9.24838	0.0025549	132.1	4.47588	0.7668	2.2
		9948.8	721.786	44.8743	0.0101135	26.68	2.87135	0.83	2.2
		1169.32	633.947	5.48569	0.0028464	182.2	2.28118	0.7362	5.2
		543702	542.994	1138.91	0.232472	0.7925	35.4437	0.8343	1.7
		2016.19	868.01	11.1042	0.0016087	116.7	4.3448	0.6399	5.3	X
		1052.36	909.102	5.77306	0.00256074	241	4.29667	0.6824	6.5
		4861.85	846.133	18.0389	0.00133935	76.17	8.48177	0.7901	3.4
		1832.29	936.025	9.68468	0.00312113	152.6	4.05988	0.7386	3.2
		15437.7	937.927	24.1335	0.00440523	63.65	11.3129	0.8062	2.8
		2306.67	697.789	10.9751	0.00234224	101.7	5.70528	0.7626	2.5
		2653.9	919.241	12.5364	0.00270545	118.2	4.29996	0.7764	4.1
		3739.95	902.605	16.9291	0.0015566	86.68	10.9602	0.7924	3.4
9	MMRS-3-24-Top SP - C base	478376	1102.72	4092.58	0.147661	0.4483	10.623	0.8362	0.75
		4263.29	1910.7	37.4192	0.0147098	83.62	13.8146	0.8059	2.8
		6025.03	812.317	41.1383	0.0619191	32.41	5.43039	0.81	2.2
		116438	1405.29	686.04	0.0137467	3.422	20.6539	0.8439	1.1
		10549.3	1218.55	86.8822	0.0866765	23.12	4.36746	0.8181	1.1
		8565.5	1092.61	65.8868	0.11863	27.09	3.13896	0.8011	3.1
		3874.91	3230.87	28.9775	0.00658987	180.3	7.45089	0.7823	2.1
		1337.45	2614.35	12.8083	0.00447915	317.7	7.73595	0.7125	5.9
		2801.96	2931.66	24.8006	0.0171204	187.9	6.82309	0.751	3.2
		37022.9	1046.56	307.467	0.0983445	5.647	22.7765	0.8307	1.6
		65383.8	805.783	493.92	0.0693457	2.715	58.1519	0.8369	1
		197944	1526.8	1498.87	0.0487435	1.692	37.7117	0.8326	0.75
		88905.4	2644.52	693.206	0.013258	6.315	26.2702	0.8262	1.5
		34306.3	1120.67	298.193	0.0724675	6.257	13.463	0.8372	0.97
		24942.9	1269.87	195.855	0.115409	10.77	13.2409	0.8334	1.3
		54329.1	2951.29	320.244	0.00556254	15.31	13.6685	0.8334	1.1
		15643.6	1296.32	131.07	0.0851689	16.39	6.34289	0.829	2.1
		18109.4	3029.92	26.1719	0.0132381	187.6	5.0958	0.7865	2.6
		76667.7	1051.36	514.997	0.111381	3.4	32.0058	0.8377	1.1
		119484	3274.24	579.887	0.0105284	9.412	67.2914	0.8396	2.5
2	MMRS-3-21-A - B top-C base-D	22937.2	812.359	102.941	0.147973	12.88	3.80746	0.7997	1.6
		18275.9	990.015	83.9191	0.13684	19.19	9.50149	0.7931	2.1
		21646.8	1001.27	91.2371	0.10936	17.75	3.5637	0.783	0.9
		26819.3	814.223	98.5351	0.210633	13.43	4.46687	0.7916	1.6
		26627.5	841.455	112.954	0.157062	12.1	3.20086	0.7907	1.2
		23193.3	789.718	103.802	0.17715	12.39	2.66951	0.795	1.1
		25013.6	827.9	112.558	0.1697	12.04	2.82796	0.8055	1.3
		20261.4	711.646	92.5289	0.182836	12.48	2.25415	0.7883	1.5
		16516.8	818.281	67.8138	0.260999	19.5	3.84547	0.7816	1.4
		16997.3	706.135	75.1595	0.125994	15.3	3.35511	0.7953	1
		18885.9	666.45	83.008	0.168364	13.09	2.21564	0.7983	0.79
		47416.4	1203.14	205.769	0.316865	9.559	2.29342	0.8029	0.65	X
		96161.1	1332.83	452.865	0.620544	4.846	7.90066	0.8163	0.67	X
		48295.5	954.67	219.953	0.274328	7.124	2.16302	0.8102	0.76	X
		20044.2	676.73	85.8906	0.159061	12.85	2.32062	0.7975	0.85
		15554.1	762.241	70.264	0.110084	17.65	2.38684	0.7937	1.2
		13688.1	762.339	62.1982	0.162895	19.84	3.46189	0.784	1.4
		15153.1	753.467	69.2398	0.144595	17.64	2.27152	0.7874	1.1
		17715.5	815.727	79.9599	0.131858	16.57	2.72705	0.7909	1.1
		22263.9	660.01	95.479	0.426773	11.28	3.94164	0.7996	0.92
		4636.65	788.609	19.7759	0.0155306	64.29	9.41247	0.7767	3.5
		6424.73	720.91	27.998	0.0429105	41.8	3.74893	0.7895	2.1
		6471.78	675.968	28.7109	0.0394844	38.23	3.56485	0.7899	2
		3798.79	881.612	16.9972	0.0264258	83.34	5.83672	0.7706	3
		10608.9	720.444	41.396	0.0922766	28.29	4.33458	0.7923	1.7
		4158.03	963.269	16.2254	0.0219197	95.04	5.55148	0.7637	3.3
		12030.1	674.449	41.7674	0.0932508	26.37	4.74182	0.8007	1.5
		4095.97	868.791	15.1043	0.0124566	92.3	11.3387	0.768	3.2
		2753.63	853.568	12.0407	0.0160474	112.5	6.2115	0.7474	2.6
		7463.85	698.091	33.3154	0.0682632	33.94	2.67917	0.7856	1.3
		2772.43	868.127	13.2879	0.0139914	104.1	10.0234	0.755	4
		4613.83	747.689	20.3045	0.031812	59.47	3.48605	0.78	2.1
		3963.71	508.175	18.5401	0.0268086	44.49	4.39475	0.7893	2.1
		2090.29	854.474	10.0621	0.0149695	134	4.61422	0.738	3.2
		1973.32	774.534	8.92031	0.0106703	135.1	4.57727	0.712	2.8
		11629.8	735.695	53.4644	0.0111907	22.47	3.37366	0.8002	1.2
		3600.28	752.242	14.5057	0.00985557	83.32	15.5929	0.7703	2.3
		2565.23	890.08	11.7098	0.0191926	120.7	4.00785	0.7494	3.2
		1608.34	976.13	7.76034	0.00973533	195.9	4.01846	0.7136	3.6
		490.546	831.398	2.6214	0.000272513	460.4	5.80283	0.5922	8.6
		1524.49	782.696	7.53041	0.000264913	164.7	4.63748	0.7455	3.4
		373.969	742.361	2.24134	0.000343229	472	10.8109	0.5617	7.2
		419.997	835.451	2.1836	0.000504378	533.4	8.60154	0.5259	5.9
		375.785	836.127	2.11407	0.000888221	566	5.72035	0.5683	8.8
		473.487	746.973	2.53063	0.00066087	428.9	8.22275	0.5936	8.8
		466.54	803.395	2.54003	0.000661569	462.5	10.9575	0.6044	8.3
		352.242	812.934	1.77163	0.00034358	625	10.3643	0.4891	11
		258.707	856.345	1.73722	0.000208189	680.8	4.66909	0.511	11
		249.654	790.708	1.44177	0.000205173	763.9	6.63501	0.5244	12
		385.991	753.284	2.1502	0.000431549	506.7	10.8728	0.5858	11
		251.686	811.764	1.51654	0.000690824	731	8.34087	0.4932	11
		496.847	730.513	2.57848	0.000935891	408.9	8.98069	0.5825	4.5
		175.428	827.534	1.12294	<0.0001	947.7	4.89577	0.4015	7.6
		205.739	817.156	1.38796	0.000297401	777.8	7.82913	0.442	5.8
		242.442	821.069	1.55503	<0.0001	700.4	7.52254	0.448	7.1
		347.6	792.982	1.92903	0.000661628	572.2	7.69017	0.5234	5.6
		267.542	726.554	1.54399	0.00014984	665.3	7.40809	0.5487	12
		6325.41	524.062	30.113	0.00434563	28.69	4.76926	0.8189	1.5	X
		1661	689.421	7.18306	0.000443128	152.4	11.8601	0.7492	2.8	X
		468.547	716.318	1.89579	0.000587423	547	12.4731	0.5874	6.3
		646.364	772.968	3.37805	0.000178457	344.3	8.82221	0.6532	8.7
		790.344	770.851	3.08658	0.00016341	363.3	20.558	0.5955	8
2	MMRS-3-24-A1 - A top	1247.56	722.802	6.95952	<0.0001	166	9.82517	0.761	4
		5656.18	631.02	30.9589	<0.0001	33.38	6.0368	0.8061	1.5
		550.378	618.042	2.37201	<0.0001	390.7	12.9454	0.647	8.8
		1430.85	654.776	6.03994	<0.0001	168.7	5.31842	0.7124	4
		1258.32	812.49	6.54804	<0.0001	196.3	17.7806	0.7423	6.5
		393.775	767.227	2.73268	<0.0001	408	10.9378	0.5941	12
		530.078	693.509	2.70692	<0.0001	375.3	11.1011	0.6073	8.3
		294.545	845.427	1.88911	<0.0001	612.4	8.06678	0.4963	9.2
		605.014	616.338	3.39916	<0.0001	273.8	8.79704	0.6589	5.7
		338.42	861.532	2.39726	<0.0001	508.8	11.5032	0.5507	7.7
		375.301	648.024	2.14613	<0.0001	440	16.5161	0.5986	9.7
		412.597	783.997	2.31245	<0.0001	496.8	15.0762	0.6078	7.8
		340.298	893.29	2.63797	<0.0001	488.4	9.83215	0.5814	7.4
		636.512	631.991	3.82545	<0.0001	256.1	4.67483	0.7055	6.2
		1039.84	630.556	6.33475	0.000150253	157.9	12.4865	0.7469	4.4
		640.515	736.094	4.12429	<0.0001	273.8	9.60442	0.687	6.5
		239.094	619.016	1.34159	<0.0001	639	8.13711	0.5153	11
		4485.55	688.623	30.4937	<0.0001	37.11	5.54517	0.8126	2.5
		1530.46	569.555	7.36176	<0.0001	124.8	13.341	0.7777	5.1
		204.248	795.524	1.56057	<0.0001	686.9	8.01965	0.4722	12
		1119.45	732.628	6.68652	<0.0001	172.5	5.80066	0.7328	4.3
		331.799	631.756	2.1776	<0.0001	427.3	13.229	0.6166	8.9
8	MMRS-3-24-A2 - A	3880.13	730.753	23.0186	0.0327986	51.11	5.48227	0.7741	1.8
		4407.97	840.202	25.2785	0.0382622	53.74	4.38207	0.7821	2.4
		3523.11	932.775	21.3046	0.0377608	70.53	3.80576	0.7753	3.7
		3653.76	1066.28	22.2542	0.020185	76.48	5.20275	0.7583	2.8
		4606.58	916.368	27.5055	0.0262564	54.1	5.15152	0.7902	2
		3120.36	1030	19.048	0.030985	86.49	4.5916	0.7622	2.6
		1721.66	1045.39	9.60996	0.00795517	170.1	6.28998	0.7207	3
		1838.27	1110.81	11.4818	0.0141388	152.8	4.85411	0.7391	3.7
		1087.45	960.749	6.87661	0.0056517	216.7	6.38649	0.7066	4.5
		3712.9	1004.38	22.6536	0.0523543	71.53	3.73496	0.7781	2.1
		6107.44	915.397	36.7519	0.0498635	40.46	4.85255	0.7906	1.5
		4510.43	773.212	27.542	0.0309362	45.19	4.97635	0.7739	2.1
		7158.04	931.404	43.2368	0.0800223	35	3.66363	0.7909	1.8
		1871.69	1001.83	11.5337	0.015245	138.1	7.98641	0.7512	4
		4376.56	1122.46	25.2837	0.0352943	71.79	9.53235	0.7822	2.3
		4159.14	934.957	24.7513	0.0463448	61.28	4.81237	0.7883	1.8
		4482.83	901.297	27.6401	0.0396912	52.5	4.08032	0.7741	2.7
		5228.62	884.781	22.3764	0.0397887	63.34	3.42794	0.765	1.4
		5583.92	952.226	34.253	0.0499789	45.04	4.67433	0.7859	1.7
		1896.24	1065	12.0349	0.0112332	140.2	9.33821	0.7444	3.5
		2296.81	1265.1	14.4603	0.0124685	138.6	11.1053	0.7442	3.1
		3017.69	1103.24	18.3163	0.0314499	97.15	4.11765	0.7776	2.3
		2977.63	1015.69	18.8409	0.0394391	85.88	3.17525	0.7548	3.6
		1472.69	1103.81	9.55311	0.00529633	181.2	7.51454	0.7258	3.4
		4357.69	1112.98	27.0384	0.0439136	66.62	5.16745	0.784	2.3
		3408.92	1162.71	21.5743	0.0431359	86.32	4.69187	0.7646	3.6
8	MMRS-3-24-A2 - E base	2729.31	1826.08	18.7114	0.0056869	153	8.23647	0.7252	3
		919.252	2373.49	6.96253	0.000178163	494.6	11.0899	0.5911	6.1
		1690.73	1738.04	12.1433	0.00541203	219.9	6.14491	0.6898	3.7
		1461.86	1991.08	10.3266	0.00210558	294.6	13.2242	0.6799	4.9
		596.627	2393.32	5.10432	0.000186035	648.2	9.00159	0.5124	8.2
		1455.86	1437.2	10.3259	0.00690338	217.1	6.3901	0.7168	4.7
		552.047	2218.57	5.00045	0.000154703	599.1	8.75247	0.4755	7.8
		2049.72	2724.17	14.9629	0.00303861	278.4	7.12926	0.6811	3.4
		1152.06	1907.48	8.43361	0.0148632	333.7	3.70216	0.6196	3.7
		683.406	1967.23	5.61354	0.000523995	500.4	6.14047	0.5646	7.6
		1178.94	1730.03	8.75275	0.00368137	300.4	5.33628	0.6706	4.3
		516.154	2201.18	4.78187	0.000605425	620.5	10.0057	0.4729	8
		462.239	2289.46	4.31713	0.000476831	712.4	5.59674	0.4674	11
		1669.29	2698.6	12.759	0.00342632	318.4	4.625	0.6539	4.1
		294.204	2331.88	3.53808	0.000139202	810.8	6.42189	0.3374	15
		632.701	2438.86	5.24098	0.000264503	632.9	3.77409	0.4868	6.4
		779.84	1892.67	6.37635	0.00478005	427.5	7.68702	0.5791	7
		829.787	2083.32	6.45698	0.00150145	467.4	4.66537	0.5885	6.5
		586.313	2855.35	5.74587	0.000487076	653.7	7.27129	0.4355	7.1
		769.888	2304.25	6.51822	0.000407543	498.2	8.70518	0.5434	5.9
		383.87	2391.63	4.04052	0.00156621	765.8	4.19826	0.4106	8
		2593.93	1720.81	18.0916	0.00186193	150.9	13.0631	0.7471	3.6
		909.724	2219.07	7.29333	0.000927305	446.1	7.36001	0.6088	5.5
		593.259	2289.76	5.36527	0.000389734	588.7	5.52908	0.509	5.3
		2474.43	1360.01	15.7296	0.00463896	136.1	3.29995	0.7334	2.6
		2122.04	1089.31	15.08	0.0065483	113.7	3.36244	0.7325	2.9
		1195.92	1532.71	9.02769	0.00241081	258.2	10.461	0.6716	4.1
		2424.82	1496.67	16.0462	0.00788828	145.3	4.56923	0.7138	2.5
		1478.49	1369.03	10.2852	0.00412211	206.3	5.7836	0.705	4.1
		2388.63	1107	15.7401	0.00757813	110.8	2.67663	0.7349	2.4
8	MMRS-3-24-A2 - F	574.722	2715.31	5.05622	0.00104557	715.5	4.14371	0.4549	7.3
		472.268	3433.79	4.92053	0.000367372	867.3	5.87967	0.3519	13
		722.074	3271.27	6.31993	0.00084045	686.5	6.91645	0.4479	6.9
		589.983	2786.72	5.25306	0.000324808	701.6	9.89766	0.4435	7.8
		568.096	3591.36	5.56137	0.000586596	822.6	4.56951	0.3876	9.3
		1269.14	3086.04	9.71535	0.0013721	448.6	8.53566	0.5466	6.8
		1041.67	3573.82	8.26918	0.00112751	593.1	8.49913	0.5008	8.1
		870.331	3132.47	7.26028	0.000891054	577	9.99307	0.4607	8.2
		777.408	3229.09	6.66283	0.000602573	650.3	6.29975	0.4657	7.6
		1232.32	3021.87	9.71593	0.000821949	441.7	5.26418	0.5557	6.4
		556.282	3374.71	5.64473	0.0003733	752.8	7.67128	0.3708	10
		1303.66	3103.6	9.9873	0.00243786	446.9	7.03491	0.5766	4.3
		729.124	3492.64	6.45972	0.000111725	713.4	10.8818	0.4401	10
		1169.95	3413.4	9.15766	0.00025784	517.4	10.1869	0.5191	7.5
		1004.09	2883.12	7.97211	0.000742812	510.9	7.68985	0.5472	4.7
		7886.8	1460.08	50.6502	0.0470822	46.83	3.10948	0.7911	1.6
		12864.4	1301.24	83.3103	0.100132	25.23	3.29515	0.7807	1.3
		22214.3	1540.55	142.934	0.176104	17.53	2.52803	0.7936	1.3
		24672	1262.44	158.407	0.186368	12.99	3.97115	0.7977	1.1
		1866.33	3222.92	13.6442	0.000889777	350.9	6.16904	0.6311	3.4
		1045.8	2493.14	7.99709	0.000302068	436.8	13.8237	0.5338	8.3
		1228.18	3101.7	9.50235	0.000367557	468.1	7.33379	0.5719	4.3
		2670.18	2747.73	18.1419	0.00152261	236.7	7.80205	0.7196	2.9
		1205.93	3640.3	9.38268	0.000307343	541.1	11.233	0.5266	7.8
		1891	3560.22	13.887	0.000980781	380.3	7.81764	0.6287	5.1
		1222.3	3754.78	10.0616	0.000294986	518.5	9.01129	0.5206	6.1
		867.763	3577.1	7.32835	0.00025719	666.8	9.40761	0.4936	6.6
		592.733	3678.43	5.84112	0.000200813	806.9	8.92079	0.3962	8.3
		555.558	3494.1	5.677	<0.0001	778.3	8.5049	0.3769	9.1
		1352.45	3319.91	10.7506	0.000518337	441.7	6.52964	0.5677	5.6
		371.441	3538.06	4.50686	0.000369822	952	4.18204	0.3172	8.7
		434.911	3435.82	4.83521	0.000208511	879.7	6.1649	0.3464	9.7
		448.516	3700.5	5.18978	0.000226913	875.6	7.11022	0.3349	9.6
		411.886	3372.47	4.79767	0.000461592	857	8.52931	0.3246	8.6
		589.86	3237.55	5.70694	0.000577594	739.3	6.4629	0.4214	8.5
2	MMRS-3-24-A2 - G	5977.99	2295.88	36.3824	0.000523198	98.32	11.7243	0.7145	2.5
		6021.77	1628.79	33.5921	0.0020124	76.42	11.7159	0.7352	2.9
		6155.93	2155.49	37.6247	0.000882451	90.84	10.5736	0.7462	2.6
		4608.12	2355.2	27.6763	0.000344531	131.7	15.1257	0.7018	3.3
		976.018	1735.61	7.91426	0.00050862	299.9	4.23215	0.4951	6.4
		513.796	1652.21	4.87704	0.000814545	423.8	2.68826	0.3613	9.1
		8560.07	1145.68	47.1845	0.016874	39.56	9.28877	0.7962	1.5
		935.324	1092.09	7.1441	0.00121515	218.6	7.15323	0.5671	4.8
		838.203	1156.8	6.57596	0.00129563	247.2	6.1667	0.5384	5.5
		3156.55	1272.09	19.4372	0.00161866	102.9	4.46913	0.7315	2.8
		1016.4	4087.63	11.3295	0.000550477	448.8	7.58466	0.3532	5.7
		1357.45	998.261	9.47952	0.00553917	161.5	4.79142	0.6867	5.4
		1368.81	1572.45	10.2385	0.00241917	221.1	5.50589	0.5785	4.4
		3542.31	1598.25	24.7961	0.00536961	99.57	12.9366	0.6991	2.5
		2475.49	783.849	15.4734	0.00987807	79.63	10.7781	0.7305	2.8
		2120.55	750.466	13.5057	0.00497216	86.55	7.35507	0.714	4
		4626.98	675.555	26.8296	0.00409059	40.8	10.4165	0.7861	2.2
2	MMRS-3-21-B - Raft 2	29060	1979.39	88.187	<0.0001	36.63	13.5219	0.7994	0.9
		6981.17	1647.23	24.5107	<0.0001	105.5	12.5243	0.7272	2.6
		3526.43	1862.11	15.0528	0.000119393	186.3	8.90704	0.6546	3.4
		3955.5	1737.36	14.5299	<0.0001	181.8	5.24717	0.6713	2.5
		18445.8	1999.06	54.4656	0.000361441	59.09	11.8582	0.774	1.7
		19514	1853.36	66.8564	0.000179875	45.12	13.6744	0.7944	1.1
		46933.5	2057.31	169.601	<0.0001	20.07	10.8297	0.8252	0.99
		33436.5	1458.47	93.9045	0.000335016	25.5	15.3961	0.8111	0.91
		51664.5	854.675	186.406	0.000201259	7.585	5.18102	0.8251	0.73
		51516	1735.03	162.749	<0.0001	17.58	11.0025	0.8196	0.95
		14160.8	1759.41	34.3563	<0.0001	81.53	14.2154	0.7535	2.8
		2637.45	1406.93	11.0849	<0.0001	191.2	7.00358	0.6554	2.5
		12977.4	2171.62	44.7878	<0.0001	77.54	10.5896	0.7618	2
		15748.2	2640.93	54.1534	<0.0001	77.31	16.0211	0.7458	2
		24484.6	2215.01	70.3658	0.000219488	51.04	15.2487	0.7872	1.2
		23059.7	2632.16	63.0802	<0.0001	67.63	12.4537	0.7865	1.4
		59218.6	2041.3	218.978	<0.0001	15.4	7.62992	0.822	0.9
		46522	1769.97	178.365	0.000137257	16.37	8.20418	0.8197	1.1
		32743.5	1848.45	105.389	0.000225956	28.87	13.3832	0.8154	2.1
		251426	978.261	921.933	0.000711496	1.763	5.27287	0.8333	0.64
		38765.6	1950.12	143.574	<0.0001	22.25	9.91404	0.8066	2.5
2	MMRS-3-21-B - Cement 2_3	13468.3	819.579	9.88613	0.000168694	127.7	11.498	0.6938	5.1
		2082.19	798.657	7.33	<0.0001	161.8	13.9957	0.6309	6
		1602.33	743.666	5.39018	<0.0001	205.8	8.37827	0.6379	5.7
		723.032	751.467	3.03032	<0.0001	332.8	9.0071	0.4658	7.3
		3795.75	625.636	13.7711	0.000128699	70.57	14.1351	0.709	4.5
		3279.7	997.005	12.7045	<0.0001	120.7	16.8123	0.6909	8
		2639.94	633.535	9.0684	<0.0001	106.9	12.3394	0.6825	5.1
		2101.64	727.694	6.95425	<0.0001	158.1	9.99838	0.6604	4.5
		4093.18	728.152	15.0555	<0.0001	75.92	10.729	0.7279	2.6
		2186.39	581.531	8.40389	<0.0001	106.4	10.8974	0.6904	4.2
		3368.51	733.731	11.7648	<0.0001	96.61	18.6769	0.7041	4.5
		5033.39	716.337	8.7531	<0.0001	124.9	18.33	0.6776	6.8
		6719.16	722.34	21.2105	<0.0001	54.05	11.5012	0.7479	4.5
		541.83	802.645	2.73768	<0.0001	383.8	8.10571	0.4281	4.9
		582.913	939.184	2.87771	<0.0001	431	7.96026	0.4414	11
		1071.89	709.691	4.12666	<0.0001	245	13.1546	0.5612	8.4
		1377.19	815.464	5.22825	<0.0001	225.4	11.9632	0.5843	7.6
		1266.6	831.287	4.52456	<0.0001	259.8	7.70654	0.5488	6
		1452.86	927.561	5.99218	<0.0001	228.6	9.34619	0.6209	7.2
		2195.23	1071.55	9.14911	0.000221275	174	10.2071	0.631	4
		8961.44	1023.74	6.9469	<0.0001	218.5	5.36506	0.6276	9.5
		2436.77	891.951	7.13666	0.000104188	183.1	16.0209	0.6071	8.6
		3344.89	809.502	12.7337	<0.0001	99.23	10.3466	0.7178	4.8
		2908.36	699.938	10.2006	<0.0001	107.9	10.5846	0.7307	2.5
		1565.07	996.388	5.83141	<0.0001	243.2	6.69996	0.5594	8.1
		5005.11	670.293	16.7374	<0.0001	63.8	12.9635	0.7547	2.2
		11110.2	728.152	39.7601	0.000106784	29.74	7.57716	0.7899	1
		3745	818.413	11.9527	<0.0001	107.2	8.20533	0.7231	3.1
		3185.02	802.934	9.34853	<0.0001	133	14.3855	0.7031	4.4
		3967.34	676.207	13.6019	<0.0001	78.1	12.8781	0.7292	2.3
		3951.35	755.384	9.51378	0.00011212	123	3.9611	0.7042	3.9
		2304.13	519.616	8.6657	<0.0001	94.48	13.4167	0.7347	2.9
2	MMRS-3-21-B - Raft 1	3889.48	3413.74	16.9284	<0.0001	288.1	9.39923	0.5654	5.2
		3823.51	3338.06	14.4706	<0.0001	320	9.53915	0.5181	3.8
		3108.52	3270.94	13.3273	<0.0001	333.6	6.76109	0.4856	12
		1778.08	3382.87	10.0087	<0.0001	435.2	4.64515	0.4035	4.5
		3558.52	3538.43	16.0186	<0.0001	312.7	8.06115	0.5506	5.1
		2564.04	3222.25	12.6211	<0.0001	349.1	6.08241	0.495	3.3
		1839.97	2931.9	9.6059	<0.0001	406	6.72724	0.4524	4.7
		4728.56	2926.78	18.9461	<0.0001	226.5	13.6154	0.6092	3.5
		1675.3	3529.14	9.70266	<0.0001	462.6	5.80954	0.3854	5.9
		9705.19	3020.05	33.3037	<0.0001	141.6	10.979	0.7185	1.9
May	MMRS-3-21-G-H - Raft 1-Raft 2	913.585	1276.61	4.72715	<0.0001	366.049	2.27459	0.482169	3.41503
		1320.06	1150.93	6.23625	<0.0001	264.984	4.48961	0.574594	4.30832
		2379.26	1010.71	10.6887	<0.0001	145.485	3.87433	0.692782	2.20355
		1277.92	1053.46	5.69605	<0.0001	264.318	5.77263	0.566954	2.63455
		1946.34	856.726	6.93509	<0.0001	185.645	4.36902	0.65162	2.07073
		4998.2	1200.91	5.12013	<0.0001	326.155	3.14732	0.522571	4.09576
		1735.89	1150.91	7.12806	<0.0001	236.748	2.1721	0.609649	2.80587
		4064.73	467.893	14.0795	<0.0001	52.8698	4.17998	0.752994	1.0085	X
		2678.36	216.229	10.4002	0.00275233	33.343	1.76784	0.767725	2.35382	X
		3837.41	270.221	14.1352	0.00258057	30.6488	3.53572	0.767153	1.85923	X
		3702.15	355.624	10.6573	<0.0001	53.5359	1.7519	0.768453	1.49486	X
		4498.41	278.057	16.175	0.00628729	27.8759	2.1028	0.788266	1.85312	X
		982.615	686.877	4.59777	<0.0001	221.347	6.03298	0.627307	4.27502
		1602.17	712.389	6.35206	<0.0001	168.446	4.66192	0.650681	2.8886
		1297.83	750.8	5.51145	<0.0001	201.067	4.58238	0.620804	2.94667
		2344.25	256.828	9.67678	0.0105399	42.1032	3.58451	0.747758	2.8436	X
		3557.47	172.067	14.3136	0.00480214	19.3729	1.691	0.776726	2.17618	X
		1100.77	921.702	5.30576	<0.0001	249.343	4.64226	0.574058	3.13161
		2656.57	463.91	10.8645	<0.0001	67.2594	9.09681	0.734879	2.37683	X
		4535.75	719.592	17.8411	<0.0001	63.9965	5.44696	0.748131	1.28835
2	MMRS-3-23 - F	1164.93	968.29	6.94589	<0.0001	206.5	6.75223	0.6265	3.8
		5840.58	1024.85	29.1198	<0.0001	56.92	9.38505	0.7826	2.7
		3411.89	969.57	17.7768	<0.0001	85.64	4.10635	0.7283	3
		3409.03	1005.11	17.3081	<0.0001	91.68	6.41799	0.7382	1.6
		2859.73	623.535	14.439	<0.0001	68.79	4.24831	0.7546	2.3
		4122.67	1141.09	24.0598	<0.0001	75.94	10.7838	0.764	1.9
		3883.88	843.116	20.2013	<0.0001	66.15	4.79555	0.7453	3.9
		15967.4	898.301	75.8176	<0.0001	19.52	4.31599	0.8176	1.1
		2628.64	574.421	11.5951	<0.0001	77.79	5.21779	0.7284	3
		2116.88	429.542	10.314	<0.0001	66.88	4.19173	0.7694	2.8
		2664.81	601.983	12.6918	<0.0001	74.53	10.9484	0.7298	4
		15930.5	844.634	78.4677	<0.0001	17.66	4.91498	0.8092	1.3
		6638.81	927.091	33.7959	<0.0001	44.25	4.09787	0.7778	2.1
		928.789	968.291	5.85644	<0.0001	239.8	8.51266	0.5903	4.8
		808.479	1145.28	5.17293	<0.0001	310.7	8.46147	0.5363	7.5
		916.631	702.326	4.75859	<0.0001	217.7	6.25726	0.6189	6.6
		1429.06	1028.44	6.69147	<0.0001	224.4	6.88377	0.6014	3.5
		1263.29	1003.49	7.45193	<0.0001	200.1	4.99345	0.6315	6.3
		920.709	1069.01	5.73246	<0.0001	263.1	7.09006	0.5451	6.3
		4486.69	651.094	16.0493	0.000182647	64.64	11.1411	0.7552	3.5
		3346.37	1004.43	16.1071	<0.0001	97.02	2.09016	0.712	1.4
		2048.03	586.852	8.86334	<0.0001	102.3	14.4903	0.6993	3.7
		2229.74	684.465	11.1188	0.000206662	95.74	4.18857	0.7112	2
		756.975	452.749	4.3075	<0.0001	157.1	4.24825	0.6417	5.6
		1817.73	733.743	8.78225	<0.0001	128.1	17.1789	0.6866	5.1
		1605.92	1213.38	8.84216	<0.0001	204	8.73865	0.632	4
		3636.25	919.188	19.8902	0.000152422	72.77	2.35544	0.7336	2
		3165.62	1005.76	13.9934	<0.0001	112.3	4.77974	0.719	2.5
		2571.77	672.673	13.6915	<0.0001	77.95	5.31502	0.7472	3.3
2	MMRS-3-25 - C top	4081.27	804.219	7.69945	<0.0001	163.3	5.74893	0.721	5.7
		2757.81	824.219	15.6472	<0.0001	85.52	16.528	0.7897	2.8
		519.722	808.57	3.32728	<0.0001	370.7	11.2393	0.677	8.6
		333.546	884.485	2.2484	<0.0001	559.7	9.61942	0.5588	9.8
		361.41	828.131	2.19801	<0.0001	539.6	8.65357	0.5696	10
		479.718	869.47	2.93555	<0.0001	449.3	9.14953	0.667	6
		306.539	855.621	2.16411	<0.0001	557.7	9.33673	0.5449	15
		269.19	742.672	1.63868	<0.0001	633.2	10.6598	0.5294	8.3
		272.039	748.446	1.58646	<0.0001	667.9	8.1129	0.5507	9.7
		130.209	722.344	1.0901	<0.0001	858	9.37312	0.4118	17
		681.985	732.415	3.92409	<0.0001	281.3	9.51599	0.6557	5.7
		1100.05	645.077	7.1135	<0.0001	141.9	14.8739	0.7222	4.4
		389.226	795.191	2.47194	<0.0001	465.8	9.61716	0.5879	7
		405.826	749.786	2.18086	<0.0001	490.8	8.25944	0.5645	9.6
		537.104	790.623	3.65161	<0.0001	328.7	11.3404	0.6687	6.9
		1772.4	618.376	3.57091	<0.0001	268.3	10.0086	0.7043	4.6
		384.721	659.64	2.27561	<0.0001	428.6	9.61181	0.623	8.5
		466.904	756.168	2.73549	<0.0001	405.9	12.0904	0.6114	9.6
		450.528	724.569	2.56136	0.000140819	410.2	15.4004	0.5903	9.7
		403.315	677.711	2.05499	<0.0001	474.9	13.0676	0.5788	10
		867.315	794.392	4.75159	<0.0001	258.3	10.9257	0.6993	5.1
		679.887	609.246	3.76068	<0.0001	253.6	11.0341	0.7228	6.4
		1199.18	712.567	6.09576	<0.0001	181.2	8.65924	0.7053	3.7
		335.167	598.764	1.97663	<0.0001	440.1	17.625	0.5934	8.9
		429.873	755.072	2.5209	0.000157234	439.8	10.6813	0.6112	7.1
		329.785	771.984	2.22141	0.000120822	506.8	7.52855	0.5998	6.4
		1410.65	783.793	6.56021	<0.0001	189.9	10.683	0.7509	3.7
		1018.9	805.506	5.19349	<0.0001	244.7	8.54411	0.737	3.7
8	MMRS-3-25 - C	392.624	987.145	3.61806	<0.0001	402.4	10.7272	0.619	8.9
		147.243	721.852	1.43874	<0.0001	666.2	11.6554	0.4496	13
		227.219	986.752	1.99363	<0.0001	669.9	9.73924	0.4792	12
		152.248	796.101	1.41428	<0.0001	740.9	6.15074	0.4364	16
		106.108	994.753	1.4177	<0.0001	869.9	9.07231	0.3484	17
		103.458	833.481	1.17317	<0.0001	871.9	11.9902	0.3339	17
		279.057	1097.46	2.84398	<0.0001	547.7	9.66931	0.5548	8
		247.419	902.921	2.05749	0.000320913	610	8.70557	0.5212	11
		296.162	897.598	2.82313	<0.0001	451.5	13.3984	0.5556	11
		259.772	1035.17	2.59076	0.000544528	568.9	6.48194	0.5601	12
		265.409	852.54	2.35281	0.000380535	508	10.6261	0.5351	13
		379.706	1042.77	3.47489	0.00169332	438.3	6.05038	0.6023	7.7
		433.503	1121.31	3.76989	0.000649476	431.4	12.0912	0.5906	10
		406.15	1017.27	3.44092	<0.0001	436.8	7.55771	0.6218	6.8
		494.022	1047.35	4.18168	<0.0001	370.4	8.01292	0.6235	8.2
		365.441	897.858	3.45425	<0.0001	379.2	12.5952	0.6002	8.1
		481.065	993.181	3.44871	<0.0001	422.1	15.5639	0.6083	5.3
		340.974	682.585	3.20081	<0.0001	318	8.53258	0.6377	11
		217.099	894.092	2.14496	<0.0001	567.7	12.3196	0.489	11
		404.812	946.223	3.67825	0.000147958	381.1	10.5472	0.6263	11
8	MMRS-3-25 - D	582.973	995.788	4.7269	0.000500832	323.7	5.28139	0.6896	5.3
		246.822	1378.97	2.72311	0.000106508	684.7	8.6374	0.4776	11
		209.266	1292.89	2.27851	<0.0001	758.4	9.4653	0.4597	17
		397.603	1235.25	3.87634	<0.0001	461.6	8.19574	0.5885	8.4
		285.19	1556.85	3.24382	0.000311199	663.3	7.46854	0.512	8.2
		257.765	1530.62	3.03431	0.000528964	667.6	10.2815	0.4447	11
		547.359	1401.48	5.45587	0.000526577	383.4	5.61072	0.6389	6.7
		226.901	1669.81	2.61424	0.000661542	821.7	6.32034	0.402	11
		605.094	1157.08	5.63234	<0.0001	309.2	10.6915	0.6535	7.2
		1104.59	1488.14	9.97301	0.000451197	230.4	12.675	0.6983	6.9
		315.76	1302.12	3.53531	0.00012926	510.7	8.7623	0.5173	7.8
		378.981	1269.73	3.9562	<0.0001	458.6	9.40336	0.566	8.7
		3332.89	1188.01	4.77553	0.00038929	376.1	7.43175	0.6612	7.7
		219.112	1316.83	2.73829	<0.0001	632.2	11.7221	0.4346	14
		4503.33	1268.5	2.55372	<0.0001	677.9	9.80028	0.492	10
		318.308	1238.83	3.50328	<0.0001	481.8	10.8156	0.4895	11
		836.051	1152.64	7.54948	0.00149735	233.2	6.15946	0.6795	4.9
		389.599	1517.21	3.66332	0.00023507	568.5	7.83208	0.5013	11
		373.22	1584.47	3.67255	0.000104246	590.4	7.39434	0.4965	8.5
		308.227	1566.22	3.84112	0.000201336	559.4	3.80757	0.5004	9.5
		467.306	1572.82	5.02421	0.000838118	458.3	10.6596	0.6062	6.7
		522.492	1364.82	4.68075	0.000115058	423.1	14.1071	0.5912	9.7
8	MMRS-3-25 - F	308.901	1432.59	3.24529	<0.0001	590	11.5623	0.4596	15
		471.335	1404.04	4.88897	0.00178406	405.2	9.46922	0.5452	6.9
		397.158	1254.19	4.2178	0.00226615	414.9	9.24494	0.5271	13
		598.205	1355.36	5.64075	0.00342055	349.9	7.98293	0.5974	7.2
		676.441	1304.72	6.70837	0.00853208	294.8	5.07187	0.6659	5.5
		417.217	1406.02	3.38501	0.00142699	556.9	7.27492	0.4644	9.7
		318.494	1479.19	3.71228	0.00084234	556.1	5.21729	0.5276	9.2
		396.546	1550.61	4.8126	0.00171708	446.7	6.75908	0.5172	8.8
		345.377	1461.3	3.57443	0.00184632	571.3	8.94562	0.5298	9.7
		338.828	1452.42	3.74161	0.00168517	548.5	6.52106	0.5475	8.6
		340.288	1610.29	3.94103	0.000515415	571.8	4.99882	0.5319	8.3
		610.467	1415.98	6.19667	0.00395973	337.7	8.44422	0.6224	8.8
		325.36	1519.9	3.6491	0.00104484	575.7	4.98588	0.5121	7.4
		7969.94	1744.13	72.5722	0.0522199	39.19	6.4553	0.7981	1.6
		7872.92	1524.94	70.9935	0.0579281	34.75	2.75242	0.7833	1.9
		9871.19	1772.47	84.7546	0.080512	34.15	5.02357	0.8007	1.9
		9237.7	1916.57	82.185	0.0695722	38.08	3.66288	0.8008	1.8
		2991.75	1838.7	28.5904	0.0218568	102.2	2.6673	0.7493	1.9
		7971.27	1637.19	72.3942	0.0718162	36.76	2.67019	0.7918	1.8
		7064.07	1619.74	63.7477	0.0592564	41.11	2.82628	0.7836	1.9
		9754.4	1529.71	80.332	0.0698183	31.13	8.05502	0.8025	1.7
		6982.63	1574.06	66.3615	0.0659821	38.29	3.30715	0.7792	1.7
8	MMRS-3-25 - G	264.15	2711.82	3.8735	0.000605507	890.4	9.38613	0.3852	17
		377.481	2264.15	5.50714	0.000378257	571.2	3.62202	0.5205	11
		173.081	2797.25	3.18831	0.000135832	1025	8.27701	0.266	14
		262.75	2366.3	3.33357	0.000170496	909.9	5.80084	0.3967	15
		248.958	3737.72	4.61362	0.00021506	960.4	7.69745	0.2859	15
		230.692	3446.76	4.10291	<0.0001	992.3	6.66455	0.2811	13
		69.4503	2100.28	2.03087	<0.0001	1124	8.04966	0.1727	13
		161.322	3300.31	3.392	0.000573851	1116	6.20592	0.2415	13
		153.824	3867.08	3.85789	0.000135368	1123	6.37192	0.2105	10
		128.129	3998.68	3.59534	0.000206406	1196	4.74968	0.1597	10
		196.18	2532.77	3.11625	0.000473779	981.2	7.80796	0.311	16
		161.301	2218.88	2.60563	0.000448725	1012	12.1012	0.2898	11
		260.523	4251.93	4.66819	0.000466861	1072	6.29958	0.2757	14
		242.456	4182.35	4.7726	0.000454803	1030	9.3702	0.2741	15
		161.897	2648.13	3.009	0.000331497	1006	9.49677	0.237	12
8	MMRS-3-25 - H	587.592	2715.29	5.99207	0.000192127	616.4	12.5303	0.4871	13
		357.418	1772.64	3.8292	0.000383231	614.1	11.6993	0.4483	9.1
		304.1	1747.81	3.80755	0.000268325	620.2	14.2141	0.4764	15
		165.214	2382.53	2.85068	0.000263293	989.4	7.2649	0.284	12
		169.883	2447.6	3.14507	0.000327819	930.7	10.2726	0.2979	16
		300.599	1722.42	3.53362	0.000357373	654.8	10.5432	0.4675	11
		207.62	1788.28	2.94763	0.000149719	783.1	6.257	0.407	12
		142.702	2441.31	2.7875	0.000139112	1026	7.82162	0.2694	12
		201.376	2532.71	3.37718	0.000240085	909.5	6.68196	0.3174	17
		529.289	1942.57	6.11715	0.00183922	458.4	16.3385	0.5825	6.4
		157.548	1612.48	2.46258	0.00127343	808.1	7.6904	0.3419	12
		215.011	1912.78	3.21497	0.00051229	763.7	11.6754	0.3989	8.9
		795.943	1911.12	10.3634	0.000609107	285.5	16.2053	0.7032	4.3
		281.899	2132.55	4.02109	0.000257558	676.6	8.77024	0.3898	15
		156	1807.97	2.51179	0.000534128	870.5	7.83355	0.3135	13
8	MMRS-3-25 - J top	4247.55	1105.52	20.6708	0.000595821	83.02	3.13124	0.7079	3.7
		816.533	1023.01	9.84465	0.000427499	153.6	4.30778	0.6224	6
		1909.71	868.279	21.046	0.000282936	64.27	2.81816	0.7141	2.6
		233.03	581.811	3.11753	<0.0001	260.4	5.34579	0.5275	11
		281.951	642.773	3.38501	<0.0001	265.8	6.77839	0.5325	8.2
		164.205	1767.83	3.44909	<0.0001	609.6	5.56566	0.2904	13
		636.448	875.687	6.41755	<0.0001	196.5	13.4032	0.579	9.5
		934.426	1446.93	11.8117	0.000173065	180.6	3.26476	0.6183	4
		484.027	631.039	5.07326	0.00016983	178.4	5.94372	0.5716	8.9
		690.096	2064.9	9.22769	<0.0001	314.3	5.47333	0.5379	6.6
		936.866	687.217	9.5638	0.000246147	106.4	11.9196	0.6257	5.2
		755.527	1331.91	9.00915	<0.0001	212.6	8.71671	0.5767	5.4
		714.136	767.65	7.99271	0.000221879	139.5	4.87505	0.5926	4.7
		1468.69	1384.46	17.4764	<0.0001	119.4	6.89083	0.6565	5.7
		330.869	1757.26	4.88645	<0.0001	466.2	10.9834	0.4135	14
		170.98	1528.04	2.98641	<0.0001	625.6	8.2919	0.3287	12
		459.018	2269.67	6.73738	0.000117602	450.7	7.6577	0.4612	8.9
		724.863	779.351	8.64671	<0.0001	135.1	5.05649	0.6466	4.8
		561.528	958.709	7.52703	0.000140189	182.6	10.8471	0.5718	8.1
		508.561	523.922	6.54461	<0.0001	119.5	7.04879	0.6398	6.4
		433.443	1153.63	5.90227	0.000107273	272.8	7.77465	0.528	8.2
		2909.55	1104.19	33.1193	0.000210891	52.09	2.92575	0.7193	2.6
		924.444	1810.37	11.6263	<0.0001	225.4	10.5242	0.5873	5.2
2	MMRS-3-25 - J top	3767.91	645.287	17.1189	0.000151549	59.53	2.85506	0.7388	2.1
		1345.83	1082.87	6.66772	<0.0001	234.2	7.73393	0.5814	4.9
		3959.52	958.422	12.6103	<0.0001	117.6	8.6818	0.7021	4.5
		4437.57	828.408	20.2935	<0.0001	64.72	3.30489	0.746	2
		789.824	1223.72	4.72134	<0.0001	351.4	4.95187	0.4818	6.9
		726.711	952.786	3.86417	<0.0001	339.1	7.39486	0.5042	9.7
		1359.7	1090.59	6.92353	<0.0001	229.1	6.49779	0.5955	7.2
		4477.09	775.406	19.7865	0.000200421	61.51	3.49108	0.7276	2.2
		925.546	987.632	5.04267	<0.0001	273.8	5.94102	0.5301	7.5
		1993.71	964.637	10.2458	<0.0001	142.7	4.39507	0.6656	3.1
		2986.96	929.935	14.5716	<0.0001	98.05	3.9745	0.6895	3.1
		3223.32	591.845	14.5346	0.000175209	64.56	3.68132	0.746	2.8
		604.323	1097.84	3.78453	<0.0001	388.2	5.87485	0.4615	6.6
		649.649	674.236	3.15901	<0.0001	296.3	4.43497	0.5189	5.7
		786.535	1115.03	4.7027	<0.0001	329	4.19277	0.5185	7.1
		1353.83	1017.39	7.45166	<0.0001	199.2	4.76132	0.6003	5.2
		631.68	1104.9	4.05484	<0.0001	369.3	5.87528	0.4813	6.4
		1801.89	1004.99	7.75607	<0.0001	194.1	5.35081	0.6453	5.5
		634.987	1018.16	3.9563	<0.0001	351.9	4.86936	0.4952	5.8
		2960.83	900.596	14.9283	<0.0001	93.7	5.69838	0.7089	2.6
		3290.89	735.067	16.7644	0.000206116	68.97	2.63845	0.7315	3.3
		4559.18	979.157	22.0676	<0.0001	70.25	5.81657	0.7435	2.3
		4485.22	692.976	20.3401	0.000225373	53.97	5.45354	0.7443	2.2
		2703.38	617.181	12.2944	0.000356468	78.11	3.45909	0.712	2.6
		1131.29	937.197	6.01249	<0.0001	227.2	3.9003	0.5988	6.1
		3088.35	887.312	13.1239	<0.0001	104.7	2.9596	0.7028	2.2
		1789.43	942.776	9.57861	<0.0001	150.2	8.88009	0.6782	3.1
		4248.59	1130.77	19.0745	<0.0001	93.35	6.95401	0.7336	3.4
		3354.51	733.612	16.1307	0.000162339	71.34	3.12014	0.7267	2.2
		5106.4	781.05	22.6463	0.000144455	54.68	8.43436	0.7461	2.7
		924.708	1097.15	4.56066	<0.0001	335.9	5.668	0.5284	8.9
		3012.28	928.724	11.8761	<0.0001	119.9	7.57018	0.6858	4.8
		2728.9	732.082	10.2622	<0.0001	110.8	6.62949	0.7085	2.5
		4110.65	979.267	18.294	<0.0001	83.18	20.1809	0.7097	10
2	MMRS-3-25 - N base	2545.7	178.447	8.58735	0.000185378	32.37	5.65716	0.7139	3.2
		2869.74	185.486	11.8253	<0.0001	24.82	10.4729	0.7425	3.6
		1121.3	474.421	5.40558	<0.0001	127.9	6.00092	0.5983	4.7
		1299.36	633.203	6.0789	<0.0001	150.4	5.39218	0.5829	5
		631.465	521.095	3.1518	<0.0001	227.1	4.56676	0.5022	7.8
		797.554	279.814	3.44951	<0.0001	118.4	7.69317	0.6014	8.6
		1350.56	226.987	5.97576	<0.0001	58.09	6.80747	0.6813	6.2
		513.436	985.286	3.57216	<0.0001	359.5	8.70625	0.4215	6.9
		758.285	367.146	3.90903	0.000100805	135.9	8.46567	0.5865	6.8
		737.743	718.394	3.74691	<0.0001	261.4	6.65181	0.4904	4.6
		472.927	1101.66	3.03594	<0.0001	448	6.20589	0.3423	9.7
		1049.44	427.514	4.77199	<0.0001	131.4	5.55215	0.6095	6.2
		834.487	547.466	3.92634	<0.0001	199.4	6.31138	0.5675	5.3
		540.838	844.161	3.0311	<0.0001	364.3	3.28191	0.427	7.7
		933.07	677.091	4.92236	<0.0001	195.5	8.03439	0.5572	7.2
		1695.13	381.691	6.86845	<0.0001	83.82	6.45092	0.6572	5
		988.32	695.828	4.61497	<0.0001	216.4	10.5039	0.5733	7.1
		1300.45	253.989	6.06646	<0.0001	65.97	6.34456	0.7346	4.7
		2016.35	335.31	8.87172	<0.0001	58.54	17.5394	0.7039	5.5
		1469.36	479.904	5.48046	<0.0001	132	12.9527	0.6557	8.4
		1740.1	268.887	6.655	<0.0001	63.02	5.43921	0.7164	4.1
		1079.87	870.324	5.79469	<0.0001	215.3	4.01813	0.5715	5.4
		951.626	398.996	4.50364	<0.0001	129	6.5375	0.5978	7.6
		874.483	433.88	4.20027	<0.0001	148.8	6.77774	0.5797	6.4
		841.969	618.322	4.45204	<0.0001	194.5	5.71346	0.5329	6.7
		891.38	425.11	3.97143	<0.0001	156.9	12.6783	0.6087	5.4
		632.889	512.705	3.31975	<0.0001	215.4	7.96505	0.5266	7.2
		411.764	553.246	2.34884	<0.0001	312.8	4.40533	0.4497	5.6
		2359.55	674.089	8.18617	<0.0001	124.8	14.1209	0.6654	5.7
		3144.08	364.565	12.9429	<0.0001	43.97	16.7899	0.718	3.9
		4301.75	640.037	20.7535	<0.0001	48.5	6.27696	0.7312	4.5
		3382.2	1212.54	16.378	<0.0001	112.7	5.77034	0.6735	5.4
		2053.69	490.422	9.13952	<0.0001	81.55	4.14858	0.6704	5
2	MMRS-3-25 - P	6983.47	96.2146	29.2716	0.000243009	5.316	7.09455	0.7826	4.1
		5369.79	85.5688	17.9147	<0.0001	7.673	2.97338	0.7701	2.5
		14326.4	108.785	57.817	0.00131208	3.046	9.35131	0.7846	1.6
		6748.2	197.602	24.9316	0.00155165	12.75	3.00993	0.7723	2.8
		6056.07	57.9325	21.1501	<0.0001	4.372	4.28052	0.7583	4.2
		4362.02	278.075	16.8245	0.000461563	26.13	4.03841	0.7409	3.5
		1146.62	1370.49	6.22105	<0.0001	298.5	6.76204	0.4809	3.8
		1800.52	1547.7	7.97146	<0.0001	268.7	4.80886	0.5142	9.4
		3811.37	203.864	15.7934	0.0015779	20.48	3.37952	0.7475	2
		746.701	1416.52	4.55899	<0.0001	384.2	7.77409	0.3445	10
		1662.27	1593.89	7.8171	<0.0001	275.7	9.81594	0.4774	13
		6548.49	324.528	26.3674	<0.0001	19.79	8.18473	0.7719	3.1
		5813.26	882.465	17.1828	<0.0001	79.55	12.3573	0.7041	5
		1635.88	1739.68	7.73197	<0.0001	303.8	6.59287	0.4757	7.1
		1680.58	1698.85	7.60801	<0.0001	301.3	8.2468	0.4745	5.1
		7620.48	249.562	24.149	0.000572009	16.71	13.0389	0.7817	3.1
		7663.41	484.726	31.7737	0.000565729	24.57	16.7187	0.775	2.2
		7102.71	596.378	29.3152	0.000107185	32.54	4.82522	0.7624	3.2
		42003.8	228.2	160.787	0.00235185	2.316	4.47562	0.7994	1.8
		8610.88	788.98	34.1388	<0.0001	37.02	12.6672	0.7649	2.8
		4499.62	1132.26	16.387	0.000209296	104.8	17.7616	0.6667	6.6
		31731.1	363.248	115.917	0.000291941	5.112	6.13064	0.7989	1.1
		6641.94	247.175	25.4157	0.000548676	15.47	7.99135	0.7524	6
		5708.32	165.098	20.9867	0.000102764	12.59	5.56029	0.7628	2.5
		16901.1	361.071	56.6751	0.000524697	10.33	8.52412	0.7878	1.4
		3169.22	1903.01	14.535	<0.0001	192.7	12.7453	0.6155	8
		4508.8	293.414	19.1363	<0.0001	24.37	2.43566	0.7506	2.9
		27365.1	236.084	153.763	0.000746728	2.511	8.75056	0.8036	1.8
		1344.84	1973.52	6.78833	<0.0001	378.5	5.87127	0.4199	7.1
		12918.5	1351.02	36.3052	<0.0001	58.89	4.71587	0.7425	2.3
		5151.73	307.387	19.5025	0.000301287	25.37	5.32862	0.774	3.4
		1135.06	2187.27	7.4481	<0.0001	374.8	5.9964	0.3903	6.8
		1141.55	1707.91	6.20705	<0.0001	354.8	7.65259	0.4057	5.5
		3011.75	2229.87	12.2671	<0.0001	261.9	12.9778	0.5797	10
		4842.58	2013.57	22.4746	<0.0001	136.3	11.2428	0.6718	3.3
9	MMRS-1-5(A) - E top-E boundary	5003.24	4471.65	26.7454	0.000383803	256.7	7.15708	0.6883	3.1
		5484.07	4587.76	30.6798	0.000231072	222.5	3.45316	0.6337	2.9	X
		3313.22	4133.6	19.3565	0.0005577	320.7	5.38204	0.6499	3.8
		4510.42	3865.49	23.7066	0.000391878	250.8	7.31084	0.6916	3.5
		4534.3	4087.31	24.0526	<0.0001	258.2	7.11112	0.6699	2.6
		3131.81	4300.17	17.9875	0.00018542	358.6	5.59324	0.6475	3.6
		4216.15	3988.92	22.764	0.000247767	267	3.76574	0.6751	2.5
		6460.11	4113.93	35.748	0.000201428	181.1	4.38334	0.7326	1.6
		3457.06	3784.72	18.8589	0.000135852	305.9	6.87241	0.6756	4.9
		4534.97	3977.85	25.6252	0.000205511	240.8	5.7568	0.7066	2.1
		5703.1	4228.39	31.2509	0.000189835	211.7	5.69558	0.722	2.5
		2665.54	3788.46	14.2472	0.000267841	396.4	3.3003	0.6372	2.8
		2229.23	3774.37	13.1776	0.000295209	419.7	4.22213	0.6079	3.2
		2465.93	3859.73	13.8178	0.000118138	411.8	3.11263	0.6179	2.2
		2409.23	4119.46	14.7241	0.000196177	411.8	5.93055	0.6156	4.6
		1449.4	1834.14	7.62989	<0.0001	358.4	2.79562	0.6372	2.1
		1736.96	1735.31	8.52431	<0.0001	308.4	3.85608	0.6649	2.6
		1844.77	1801.98	10.0483	<0.0001	272.4	4.95817	0.6698	6.3
		1665.34	1661.65	8.53539	<0.0001	298.9	6.37598	0.6883	3.3
		1317.88	1780.16	7.44751	<0.0001	358.7	6.05202	0.6486	2.7
		3496.49	1781.02	19.4779	<0.0001	144.8	5.89665	0.7441	2.3
		7164.11	1869.22	36.3322	<0.0001	82.55	6.17772	0.768	1.6
		5485.16	1881.22	28.5026	0.000236148	105.9	7.95929	0.7673	2.5
		4317.87	2285.5	23.28	0.000133766	155.5	3.77702	0.7445	2.2
		3888.4	2053.7	19.2557	0.000167824	167.6	3.89664	0.7293	2.2
		1398.74	2002.46	7.91055	0.00030187	376.6	3.96883	0.6338	3.2
		3113.82	2269.13	17.2689	0.000121613	204.3	4.09213	0.7111	2.4
		1985.26	2176.84	9.90951	0.000231537	333.2	3.75901	0.6672	2.7
		2807.24	2002.24	15.2927	<0.0001	203.5	5.20414	0.7102	1.6
		2480.64	2123.64	13.843	0.000570176	236.8	6.03819	0.6977	1.9
		3533.58	1851.5	19.3578	0.000124541	152	9.57601	0.7502	3.4
		4341.24	1874.13	22.0747	0.000301073	135	7.07006	0.7507	3.1
		6729.9	1160.67	31.2431	0.000140429	60.34	8.01602	0.7907	1.9
		6008.85	1876.65	35.9106	0.000102007	84.31	5.91509	0.7779	1
		9152.59	1829.25	46.6222	<0.0001	63.55	6.4694	0.7853	1.3
		6037.37	2202.32	32.2498	0.000146747	109.3	4.07548	0.7641	1.7
		2284.76	2295.49	13.3778	0.000117579	264	4.25033	0.6917	2.3
		5863.46	2184.26	32.3696	0.000496826	108.1	7.62841	0.7652	1.6
		6959.51	2319.41	37.2298	0.000140257	100.5	4.80975	0.7773	1.7
		3353.48	2323.7	19.1521	0.000175712	189.3	2.87743	0.7173	2.2
		4292.67	2162.46	23.4777	0.0003	146.3	4.95371	0.7497	2.3
		6454.03	2325.81	36.1003	0.000454548	103	5.91013	0.7605	2.1
		3641.99	1976.04	20.755	0.000203769	150.9	3.44491	0.7451	2.4
		1696.69	2246.54	8.92557	<0.0001	374.8	3.43706	0.6351	2.6
		2936.93	1978.37	17.0501	0.000267646	182	5.67924	0.726	2.9
9	MMRS-1-5(A) - F	1188.59	5074.85	8.53639	<0.0001	778.7	4.10706	0.429	5.6
		3109.96	4154.83	17.2932	<0.0001	358.1	5.67324	0.6367	2.5
		2471.7	3536.36	14.4777	<0.0001	363.4	2.63865	0.6338	3.1
		3440.83	3668.68	18.1092	<0.0001	308.4	4.39553	0.6731	3
		4656.78	2483.24	24.0599	<0.0001	161.8	4.09495	0.7254	2.6
		4018.96	1824.76	19.3973	<0.0001	148.3	6.02207	0.736	3.2
		2708.01	1732.33	14.3149	<0.0001	188.2	4.14156	0.7115	2.5
		3316.25	1671.38	16.5398	<0.0001	160.1	3.10038	0.745	2.7
		2284.04	4030.04	13.2758	<0.0001	443.5	3.49805	0.603	1.7
		4032.43	2913	21.5252	<0.0001	209.7	3.14961	0.7045	2.4
		1830.44	2400.18	9.95914	<0.0001	358.5	6.02911	0.6334	3.1
		1872.55	2382.95	11.0299	<0.0001	325.1	3.33234	0.6529	3.9
		5893.78	2718.76	30.9035	<0.0001	139.6	5.38499	0.7469	2.3
		14839	1830.62	72.4111	<0.0001	41.22	4.12511	0.7978	1.1
		4543.55	2403.94	22.5345	<0.0001	167.2	3.04127	0.7247	3.3
		2937.18	2425.15	15.9825	<0.0001	234.5	3.59624	0.6997	3.5
		6036.54	1833.39	31.06	0.00057516	94.85	2.91193	0.7706	2
		3457.99	3468.03	19.0238	<0.0001	279.4	3.16594	0.6851	3.9
		4843.1	1504.67	24.7067	0.00016916	97.54	5.01755	0.7645	1.8
9	MMRS-1-5(A) - F-G boundary	8445.5	5866.97	40.5785	0.000168549	223.5	3.21454	0.7004	1.4
		9570.72	5796.96	49.0249	0.000162186	184	3.44039	0.7122	1.9
		14024.4	4476.28	69.9208	0.000159292	102.3	4.17605	0.7608	1.3
		13269.3	5715.34	64.1086	0.000118477	140.6	2.44382	0.736	1.3
		11098.6	6414.1	55.7848	0.000149656	180.3	4.262	0.7256	1.2
		7675.61	5293.95	38.9555	0.000139969	211.5	3.18798	0.7126	1.4
		10484.1	7051.9	52.9637	0.000142122	208.3	4.8422	0.722	1.5
		6101.44	5696.85	32.7737	0.000141739	263.6	3.31557	0.6666	2.2
		9626.76	7178.58	49.7533	0.000341208	223.7	5.12089	0.7057	2
		8554.76	7389.51	43.8949	<0.0001	256.2	6.64522	0.673	2.2
		4823.36	7532.32	26.6355	0.000150739	416	5.28167	0.6144	2.8
		11267.3	7968.49	57.3821	0.00012155	215.4	8.18738	0.7063	2.2
		13273.7	7547.48	33.555	0.000123478	337.6	5.92513	0.6487	1.5
		5387.22	8221.74	27.7125	<0.0001	432	2.79256	0.5972	1.8
		7454.53	8362.8	40.5128	0.000229916	311.1	5.99895	0.6561	2.6
		10241	7851.78	54.5898	<0.0001	222.8	5.19148	0.7038	1.6
9	MMRS-1-5(A) - G top	7608.25	2280.3	35.714	<0.0001	100.7	3.36012	0.7356	1.8
		9947.87	1052.71	46.1466	<0.0001	36.8	2.58635	0.7777	1.6
		11829.7	2103.79	53.9128	<0.0001	63.03	1.96489	0.7804	1.5
		2478.39	2881.03	12.9456	<0.0001	332.1	7.91458	0.6389	3.9
		4264.45	2348.6	19.7988	<0.0001	183.2	4.50929	0.6989	2.3
		6121.38	1746.5	29.1247	<0.0001	94.93	4.47814	0.7432	2.4
		2867.45	1235.64	14.0477	<0.0001	137.5	3.32728	0.7198	3
		3750.81	1734.35	16.4662	<0.0001	165.3	7.44976	0.7273	2.9
		4612.1	1827.54	22.6792	<0.0001	125.8	2.73554	0.7179	2.9
		6899.3	2148.67	32.3844	<0.0001	105.7	3.38505	0.7546	2.1
		2957.39	2086.16	14.4532	<0.0001	221.9	8.33311	0.6909	2
		4579.76	2379.7	22.3828	<0.0001	166.4	2.93761	0.7227	3
		1706.14	2852.91	9.51094	<0.0001	433.7	2.78191	0.5854	3.4
		2011.12	2795.69	11.0637	<0.0001	370.6	4.39284	0.6091	3.3
		3122.85	1570.39	15.368	<0.0001	160.5	3.72816	0.7291	3.5
		3649.22	1812.95	17.7533	<0.0001	160.6	7.32724	0.7309	2.6
		7596.26	1788.13	36.7492	<0.0001	78.35	11.8443	0.7745	3
		5207.36	2025.6	25.242	<0.0001	128	3.77188	0.757	1.9
		7782.82	2055	37.3253	<0.0001	87.53	3.04015	0.751	1.8
		3059.4	2729.55	15.9415	<0.0001	258.1	5.70498	0.6564	2.8
		4958.97	1946.26	24.543	<0.0001	125.7	4.91061	0.745	3
		1557.73	1810.15	8.36718	<0.0001	324.8	3.32809	0.6492	3.8
		9455.1	3678.31	46.1536	0.000228283	125.5	2.18257	0.7336	1.8
		14995.1	4192.63	69.2357	0.00029088	96	2.27616	0.7458	1.8
		12267	2050.73	59.4604	<0.0001	55.41	2.79213	0.7704	1.2
		10886	1610.95	50.9862	<0.0001	50.75	2.93272	0.7697	1.3
		1114.38	2680.2	6.7449	<0.0001	555.2	3.2851	0.5296	4.5
		7367.7	2354.98	35.843	<0.0001	105.3	4.48997	0.7665	2.8
9	MMRS-1-5(A) - I base (II)	9460.85	1693.31	31.9027	0.00270377	83.6	7.55778	0.734	1.5
		4379.96	1816.01	20.8801	0.0062694	133.3	6.17913	0.6847	2.7
		8620.34	1962.55	38.8347	0.00232364	79.54	6.20686	0.7326	1.7
		10162.6	1893.66	44.649	0.0131055	67.45	10.2571	0.7517	1.7
		7266.13	1034.66	29.6181	0.0257796	55.89	5.11647	0.7625	1.2
		16412.7	1303.45	68.6915	0.0030394	30.9	4.3801	0.7953	1.5
		9492.14	2037.1	42.2521	0.00114512	76.65	7.92753	0.751	1.8
		21201.1	1780.4	89.6712	0.000650266	32.26	13.7433	0.7914	1.4
9	MMRS-1-5(A) - I middle	29035	3881.21	116.617	0.00554172	53.27	2.6173	0.7632	1.5
		31938.5	1707.34	135.176	0.000455159	20.75	10.8067	0.8123	1.2
		11582	2507.31	53.9468	0.00130328	74.14	11.6395	0.757	1.6
		13331.7	4259.94	62.062	0.00236883	106.8	3.52774	0.7118	1.8
		59941.9	716.704	256.637	0.00166908	4.641	6.28986	0.8336	0.87
		10360.1	1797.16	43.4321	<0.0001	65.89	20.2171	0.754	2.4
		19328.8	2088.53	84.7426	0.00347266	40.13	5.28136	0.7952	1.7
		4168.07	1213.92	18.2243	0.000381345	104.3	5.36517	0.7229	2.1
		12110.8	764.985	50.7367	0.000848348	24.61	12.5054	0.8	1.4
		14823.2	942.027	61.6583	0.00127122	25	6.65214	0.8045	1.7
		5914.37	1901.12	28.0606	0.00654158	104.7	4.89403	0.7005	2.1
		10487.2	2592.88	45.893	0.0196272	88.9	2.58478	0.7323	1.7
		13085	2960.67	52.7356	0.0193508	87.91	2.61807	0.7233	1.6
		5781.29	1872.52	27.59	0.00699696	105.8	2.44724	0.7152	1.7
		36466.9	819.108	143.177	0.00225756	9.489	13.828	0.8301	0.87
		12743.6	4486.89	58.9158	0.0106468	118.6	6.88433	0.7139	1.7
		10253	5350.37	53.1794	0.010494	154.1	4.85788	0.6835	1.7
9	MMRS-1-5(A) - I base (I)	7567.35	783.061	31.3057	0.000264465	40.18	5.74252	0.7699	1.7
		2814.52	1402.78	12.6128	<0.0001	166.8	6.51494	0.6473	2.8
		1277.54	1428.16	6.71819	<0.0001	290.5	2.79635	0.4941	4.9
		512.566	1464.09	3.99791	<0.0001	439.3	5.35958	0.3022	9.3
		727.732	1992.96	5.53003	0.000372916	439.8	3.21063	0.3259	6.8
		5197.2	1164.26	20.4621	<0.0001	89.93	15.3626	0.7403	3.5
		11168	1209.42	19.9959	<0.0001	94.91	4.62181	0.7273	2.5
		2225.31	1017.43	9.82215	<0.0001	154.8	10.0384	0.641	3.8
		1294.34	1323.23	6.54187	<0.0001	279.9	4.28988	0.5142	7.3
		967.995	1221.2	5.28391	<0.0001	308.3	5.51004	0.4569	5.8
		831.424	1086.7	4.7064	<0.0001	304.2	6.37566	0.4378	7.8
		2685.43	1272.83	12.4855	<0.0001	151.1	4.44028	0.6269	3.8
		7490.55	1095.63	31.4088	0.0129026	55.28	4.04703	0.7452	2.4
		9563.82	1085.91	40.4357	0.019772	42.84	6.15162	0.7573	1.5
		1072.67	1241.46	6.02203	<0.0001	278.6	5.12482	0.4766	6.6
		3552.09	1507.51	15.7627	0.000128904	144.5	4.62443	0.6604	2.1
		3446.8	1454.24	15.2545	<0.0001	145.3	7.44015	0.6759	3.2
		8454.09	1402.42	28.6038	<0.0001	77.37	5.01786	0.7374	3.7
		3076.48	728.931	13.4488	0.00464198	84.02	2.28709	0.7055	2.1
		1719.13	1053.06	8.08616	<0.0001	188.6	7.3058	0.5879	5.1
		3843.16	1255.47	16.8339	<0.0001	116.1	6.41198	0.7123	3.7
		12781.1	1068.17	52.7861	0.0341583	32.54	4.87107	0.7717	1.5
1	MMRS-1-5(B) - G top-F	1970.17	500.74	6.50614	<0.0001	120.8	6.38151	0.7274	6.2
		3457.88	1283.07	11.2926	<0.0001	179.2	12.6019	0.7368	2.7
		2149.73	701.049	7.05621	<0.0001	154.5	6.82566	0.711	4.5
		2787.27	761.006	9.14045	<0.0001	130.4	12.2588	0.7237	5.3
		2637.91	633.705	8.77735	<0.0001	113.7	5.19387	0.7338	3.8
		10132.6	415.956	34.4234	<0.0001	19.52	4.10676	0.7801	1.7
		11011.7	534.969	37.8286	<0.0001	22.9	2.66596	0.7849	2.4
		3074.61	761.94	10.4052	<0.0001	116.8	3.75245	0.7566	4.6
		2651.95	1960.72	8.5687	<0.0001	348.3	8.55656	0.6733	5.7
		11086.4	764.619	38.4805	<0.0001	32.37	14.6446	0.7963	3.3
		3396.13	799.461	11.4882	<0.0001	110.6	14.4094	0.7502	3.8
		4563.02	680.607	15.5959	<0.0001	69.9	7.61697	0.7648	2.8
		14822.3	631.465	51.4474	0.000862793	19.97	4.33845	0.794	2.2
		3702.78	421.195	12.745	<0.0001	53.74	12.6691	0.7928	2.8
		2380.81	670.456	7.97454	<0.0001	131.5	8.2091	0.7215	4.2
		4965.09	659.956	18.0876	<0.0001	59.25	8.58117	0.7903	3.8
		4102.76	745.227	14.061	<0.0001	84.98	11.5694	0.7665	2.6
		5057.47	634.756	17.7237	<0.0001	58.46	8.97023	0.7998	2.1
		3268.43	530.358	11.5081	<0.0001	74.6	7.20103	0.7841	3.1
		3714.35	814.489	12.7331	<0.0001	100.8	5.08098	0.7345	3
		3961.16	778.798	13.7819	<0.0001	90.56	9.09817	0.7656	4.3
		3862.19	721.547	13.3656	<0.0001	86.26	11.3742	0.7603	3.6
		7496.04	829.96	26.643	<0.0001	50.78	4.59375	0.7973	2.1
		3217.14	705.385	11.2424	<0.0001	100.3	10.5153	0.7603	4.3
		2295.6	559.469	7.9428	<0.0001	111.3	7.43957	0.7396	8
		3858.28	763.642	13.6236	<0.0001	91.02	11.4024	0.7901	3.1
		2215.36	724.761	7.58238	<0.0001	149.4	11.1956	0.7206	5.5
		2985.57	816.885	10.4151	<0.0001	124.3	8.01116	0.7457	3.8
		3656.3	715.73	12.7724	<0.0001	89.64	13.3873	0.7623	4
		3263.6	743.053	11.4536	<0.0001	104	15.4089	0.7655	4.2
		11537.2	760.07	41.481	<0.0001	29.87	6.60158	0.7974	1.3
		3549.36	708.486	12.6581	<0.0001	90.28	16.2357	0.7776	2.6
		1778.37	634.826	6.15791	<0.0001	161.4	9.83602	0.7229	5.3
		3097.43	728.198	10.976	<0.0001	106.2	11.1899	0.763	2.3
		13522.6	573.533	48.8337	<0.0001	19.09	3.63559	0.7919	2.5
		14905.8	581.871	53.9537	0.000909588	17.57	3.66246	0.7968	1.6
		15876	598.673	57.6158	0.00161152	16.93	4.35424	0.7969	1.5
		13748.9	617.676	50.0397	0.000759889	20.19	4.96254	0.8033	1.6
		17301.2	588.937	62.8788	<0.0001	15.26	4.81914	0.7965	1.8
		17962	604.275	65.2504	0.000202893	15.06	7.09887	0.7934	1.7
		17055.3	629.838	62.0794	0.000946711	16.52	3.76124	0.7948	1.6
		11764.5	342.831	43.1845	<0.0001	12.98	5.18922	0.8032	2.1
		12251.3	2570.3	44.0277	<0.0001	93.49	6.21066	0.7643	1.9
		9035.78	3663.34	31.8112	<0.0001	180.2	4.71993	0.7218	2.1
		9834.66	2259.65	35.555	<0.0001	101.3	6.73335	0.7561	1.9
		8777.48	2807.95	31.9055	<0.0001	139.9	7.29105	0.7509	2.6
		4337.93	4464.64	14.321	<0.0001	455.2	5.57797	0.6017	4
		4632.38	3554.39	15.8194	<0.0001	338.8	4.28596	0.6568	3.4
		6954.62	5040.37	24.1108	<0.0001	319.1	3.67289	0.6781	2.6
		10084.8	4664.81	35.7338	<0.0001	204.3	5.76617	0.7228	3
		8875.43	4307.15	31.0734	<0.0001	214.3	4.25603	0.7009	3.4
		12985.1	3789.67	46.8064	<0.0001	128.7	4.61058	0.7502	2.1
		11254.9	5324.51	39.731	<0.0001	208	7.45953	0.7078	1.8
		15490.1	4044.17	56.4321	<0.0001	114.2	3.9455	0.7545	1.8
		12665.7	3232.24	46.2958	<0.0001	111.5	6.10917	0.7593	2
		15825.2	4781.38	57.1899	<0.0001	132.4	6.56563	0.7434	1.9
		21349.2	2754.84	79.6596	<0.0001	55.94	4.43907	0.783	1.8
		19426.6	2564.18	72.3441	<0.0001	57.15	3.96241	0.777	1.2
		22248.9	2577.16	82.9601	<0.0001	50.03	4.05255	0.7748	1.2
		10103.8	2591.7	38.4353	<0.0001	107.8	12.4121	0.7614	2.4
		9117.57	2819.21	33.7804	<0.0001	132.9	14.1255	0.7538	2.1
		11166.4	2788.09	41.8655	<0.0001	106.2	7.21433	0.7573	1.9
		16794	2732.48	64.028	0.000167961	69.13	12.0369	0.7856	1.6
		16724.1	3024.91	62.9219	<0.0001	77.51	4.82678	0.7768	1.3
		13441.8	2748.37	50.5871	0.00013143	87.1	14.4925	0.7665	2.7
		13712.8	2826.8	51.1364	0.000126873	87.98	4.83699	0.7529	1.9
		8469.18	2549.28	31.9177	0.000155487	127.3	8.55121	0.7558	2.3
		11404.1	2641.36	43.0325	<0.0001	98.19	4.16797	0.7624	2.2
		9621.12	2936.76	35.833	<0.0001	129.8	3.24991	0.7442	2.9
		7229.85	2520.42	27.2968	0.00021334	145.8	9.3364	0.7385	3.3
		9092.49	2613.31	34.4146	0.000245042	121.9	7.39065	0.7684	2.2
		8119.26	2551.93	30.2611	0.000753732	132.8	9.52047	0.7337	2.6
		7494.56	2664.81	28.3186	<0.0001	149.9	3.36209	0.7545	2.9
1	MMRS-1-5(B) - G base	1680.82	1564.73	4.89086	<0.0001	459.4	12.9823	0.574	6
		3127.14	1528.55	9.75983	<0.0001	241.5	14.6596	0.696	3.4
		2509.71	1571.2	7.72469	<0.0001	306	11.9903	0.6528	7.2
		3490.04	1609.16	11.0543	<0.0001	227.3	12.3177	0.7185	3.8
		3626.1	1609.58	11.7126	<0.0001	216.6	16.5903	0.7355	4.1
		2067.74	1782.05	6.12359	<0.0001	421	7.61759	0.5865	4.1
		8270.56	1694.43	27.1605	<0.0001	100.4	6.84278	0.7726	2.8
		3215.44	1434.35	10.2077	<0.0001	219.2	11.8625	0.7166	4.2
		3346.14	1769.76	10.34	<0.0001	260.2	10.5354	0.6707	3.8
		1499.46	1825.47	4.29591	<0.0001	592.5	12.1007	0.5262	8.2
		3743.67	1929.28	11.8795	<0.0001	251.7	11.9965	0.7053	3.5
		5934.46	1870.41	19.4096	<0.0001	153.5	12.0984	0.7544	2.3
		3125.8	2164.5	9.526	<0.0001	335.6	12.2008	0.6214	7.4
		1578.84	1794.96	4.64212	<0.0001	548.7	10.5483	0.5546	8.7
		1559.19	1948.55	4.48411	<0.0001	599.8	10.1469	0.5101	8.7
		1714.14	1768.41	5.00214	<0.0001	496.3	11.4742	0.5372	6.9
		1947.27	2259.81	5.69064	<0.0001	559.8	11.2301	0.5439	9.5
		2793.28	2059.73	8.70183	<0.0001	352.5	9.78266	0.6353	6.3
		2254.04	1881.33	6.95995	<0.0001	401.4	9.17027	0.6302	5.1
		10787.6	1791.81	36.473	<0.0001	79.79	8.74145	0.7904	2.2
		5110.46	1853.1	16.8273	<0.0001	173.1	7.92165	0.7307	3.1
		4595.2	1898.31	15.025	<0.0001	197	5.58757	0.7158	4.2
1	MMRS-1-5(B) -H	4589.29	2250.44	12.5225	<0.0001	264.4	11.6818	0.6148	5.1
		1714.62	2181.47	3.37063	<0.0001	783.4	10.4831	0.3146	13
		2278.88	1032.34	6.68944	0.000327631	228.5	5.63198	0.6255	6.9
		4175.7	1376.07	12.8333	<0.0001	166	9.74604	0.7028	3
		15705.9	1322.59	53.211	<0.0001	40.6	18.8935	0.801	2.1
		17528.1	5903.95	53.9719	<0.0001	169.2	18.1965	0.7016	6.3
		9162.32	5581.59	26.1024	<0.0001	310.9	11.542	0.5948	9
		3365.65	3532.2	8.66252	<0.0001	526.4	7.9629	0.4073	13
		2267.74	4121.86	5.14091	<0.0001	908.9	4.14645	0.2263	11
		4187.04	4088.39	11.2042	<0.0001	495.1	9.91172	0.483	12
		2620.05	3296.13	6.59301	<0.0001	628.4	7.33862	0.3682	10
		57277.9	702.145	189.684	<0.0001	6.113	9.88423	0.8219	1
		3298	6004.46	7.53649	<0.0001	906.7	7.14086	0.2313	6.9
		6886.6	6308.74	19.024	<0.0001	462.6	10.2835	0.527	5.4
		2458.41	2436.32	6.60432	<0.0001	490	6.90496	0.4503	6.5
		3308.65	2518.78	9.47392	<0.0001	378	11.882	0.5578	8.8
		2448.07	4165.19	6.51728	<0.0001	769.6	5.06257	0.3075	5.8
1	MMRS-1-5(B) - I top	15324.3	1343.44	47.5725	0.00182886	45.77	5.99728	0.7866	3
		8275.97	1222.27	25.2284	0.000815777	76.97	4.2724	0.7498	2.1
		2623.78	1024.77	7.39451	<0.0001	204.6	9.37821	0.6201	4.9
		4348.83	985.388	12.8632	0.000229916	117.7	17.9001	0.6898	5.5
		6852.73	958.041	20.7154	0.00366319	72.48	10.0283	0.7249	1.9
		4183.8	810.619	12.4337	0.000478443	100.8	9.94121	0.701	3.5
		1921.68	1254.83	4.95362	<0.0001	337.6	8.04002	0.4553	8.2
		12961.4	1055.5	40.046	0.000318073	42.4	9.47585	0.7726	2
		5244.55	1072.53	15.6492	0.00174769	105.1	10.7579	0.6859	4
		2769.53	1058	7.71483	0.000799723	198.4	11.6561	0.5861	7.3
		3271.26	1058.38	9.27807	<0.0001	168.5	7.99751	0.6216	5.6
		2339.26	926.347	6.59994	0.000130417	203.2	5.51209	0.5877	5.6
		5755.43	1708.79	16.6797	0.000129428	154.2	13.5539	0.6541	4.8
		3637.72	2678.1	9.36056	0.000355687	375.5	7.46163	0.4319	6.7
		3230.98	858.489	9.40144	0.000132905	136.8	11.1875	0.6461	11
		5288.55	2352.35	14.7726	<0.0001	226.9	19.6246	0.5611	8.9
		4616.27	1158.23	13.4232	0.00022889	129.1	10.3824	0.6427	5.3
		1932.58	995.643	5.38374	<0.0001	262.7	8.77798	0.556	5.3
		3130.77	1171.95	8.99615	0.00014384	189.3	14.9279	0.594	8.9
		13417.5	1580.35	42.212	<0.0001	60.12	9.58397	0.7694	2.4
		6614.4	1320.87	19.8246	0.000184833	102.3	16.7046	0.6876	4.6
		5487.85	895.41	17.2326	0.000133454	80.46	18.8177	0.7034	5.5
1	MMRS-1-5(B) - I base	16766.1	1139.31	47.7898	0.00682417	37.19	3.41294	0.7166	1.5	x
		6148.26	894.182	17.4181	0.00124767	78.76	6.91909	0.6871	4.7
		8456.49	671.161	25.0503	0.00301916	42.86	10.7176	0.7622	3.6
		10703.2	794.641	31.4032	0.000395956	40.53	14.6897	0.7645	2.9
		49820.6	465.457	151.255	0.0329862	5.026	5.97945	0.8009	1.6
		4820.07	813.822	13.6649	0.00176395	91.02	3.91746	0.6802	3.1
		4949.81	719.489	14.168	0.0065472	78.37	5.68522	0.6975	2.7
		4312.67	1319.85	11.5485	<0.0001	166.1	20.8594	0.594	7.6
		3640.09	692.163	10.2989	0.00200004	102.1	4.11583	0.6693	4.5
		8632.55	582.955	25.3171	0.0024102	36.59	10.9817	0.7503	3.7
		5429.44	931.381	15.4498	0.00284351	92.09	5.56988	0.6794	4.4
		3030.48	1329.82	7.49537	<0.0001	246.6	6.18887	0.521	7
		3439.04	694.069	9.74875	0.0015591	107.3	6.17781	0.6555	4.7
		2414.22	1161.23	6.59758	0.000188857	247.9	5.60843	0.5426	4.8
		5084.56	1077.16	14.2443	0.000779755	113.4	7.54466	0.6474	5.4
		5128.34	891.959	14.6893	<0.0001	93.11	12.8291	0.6862	6.1
		5232.3	473.632	15.4673	0.000224225	48.56	11.0859	0.7462	4.1
		4829.29	1715.04	13.4253	0.00033117	187.4	9.75571	0.6093	6.4
		3687.44	1014.77	10.4268	0.000186051	144.2	11.6899	0.6267	7.5
		3544.46	664.478	10.3033	0.000793272	97.82	7.1362	0.667	6.2
		4062.05	1431.15	11.1255	<0.0001	186.6	8.32302	0.5907	4.9
		2191.6	1465.06	5.81488	<0.0001	334.7	7.30917	0.4502	9.8
		4264.8	659.866	12.4842	0.00280629	80.69	3.53138	0.6782	3.3
1	MMRS-1-10 - M-L	1387.18	870.82	6.15896	<0.0001	226	19.1715	0.7606	5.6
		1007.44	889.876	4.35498	<0.0001	320.5	25.5114	0.7265	5.8
		629.963	1005.72	2.60244	0.000124856	574.4	13.3085	0.6321	14
		650.447	872.347	2.90369	<0.0001	478.6	11.0944	0.7549	8.4
		714.424	862.891	3.18352	<0.0001	429.9	14.7913	0.7467	7.7
		904.175	909.92	3.99033	<0.0001	360.8	17.8229	0.7424	8.3
		565.243	946.095	2.37656	0.000211439	599.2	18.7303	0.6537	6.5
		2255.59	899.165	10.1216	<0.0001	141.9	7.34784	0.7601	5.3
		2981.54	1042.92	13.7331	0.000111512	124.7	22.9199	0.8117	4.5
		1059.83	861.396	4.67536	<0.0001	290.5	20.0822	0.736	5.2
		2760.14	875.5	12.5611	<0.0001	113.2	16.968	0.7908	3.9
		2121.07	977.327	9.7929	0.000119273	163.3	9.04914	0.8047	3.4
		2801.84	959.877	12.9962	<0.0001	121	8.86845	0.8067	3.1
		1693.16	1031.05	7.7508	<0.0001	215.2	12.7782	0.783	5.3
		717.299	842.281	3.15908	<0.0001	414.1	19.4317	0.7089	7
		1072.45	920.205	3.73479	<0.0001	381.3	12.731	0.7026	7.3
		6000.98	749.314	28.482	0.000644288	43.45	14.9291	0.8222	2.9
		718.686	1057.4	2.88389	<0.0001	554.3	15.6802	0.6612	9.5
		814.421	921.315	3.63904	<0.0001	394.5	19.3663	0.7147	8.6
		1077.05	932.665	4.82375	<0.0001	305.6	21.8156	0.7405	7.9
		2757.36	474.897	13.0505	0.000872005	59.29	4.5063	0.7965	3.6
		20986	525.732	101.306	0.000335259	8.614	8.7291	0.8315	1.2
		1601.5	453.852	7.54967	0.000844265	97.55	12.4154	0.7888	5.3
		933.437	467.428	4.37679	0.000155146	171.4	6.11258	0.7687	5.3
		419.948	481.497	1.92061	0.000283243	392.9	8.57764	0.7248	7.2
		759.902	451.473	3.56811	0.000362909	203.4	7.73286	0.7716	4.9
		696.582	478.242	3.24948	0.000487655	235.5	11.9959	0.7626	9
		931.495	465.91	4.41288	0.000292479	170.7	6.18825	0.7821	4.1
		1040.25	480.785	4.82836	0.00312449	157.6	11.497	0.7428	6.5
		1948.09	458.744	9.28535	0.00035126	80.87	15.4375	0.8051	4.6
		1815.79	474.174	8.65542	0.00041895	88.72	9.04534	0.7852	3
		1165.63	464.739	5.59062	0.00120792	133.8	15.4756	0.7743	7.5
		2364.39	473.516	11.3312	0.000323357	68.07	10.2016	0.7961	4.2
		1902.88	446.445	9.08612	0.00166329	79.53	14.9286	0.7841	5.2
1	MMRS-1-10 - Q	1235.93	861.179	4.54731	<0.0001	266.2	9.59492	0.5392	8.2
		2084.41	1114.45	8.01383	<0.0001	204.6	16.1709	0.615	7.9
		2126.83	1076.79	8.1819	<0.0001	192.6	14.6693	0.6056	8.7
		1875.4	1051.79	7.04189	<0.0001	213.8	10.1381	0.5689	6.6
		1550.92	1229.39	5.71961	<0.0001	296.8	11.2795	0.5108	6.4
		1934.91	928.048	7.74282	0.000124666	175.2	14.5829	0.604	5.8
		1200.52	541.652	4.70738	0.000184559	170.3	9.42124	0.6251	7.9
		1840.63	963.491	7.27299	<0.0001	196.9	15.5291	0.6321	6
		2626.36	788.78	11.0532	<0.0001	111.9	6.73296	0.7267	4.5
		2097.89	619.399	8.633	<0.0001	109.5	7.03499	0.6773	3.9
		2016.47	1130.57	8.01997	<0.0001	208.3	8.26844	0.6218	4.4
		1780.25	953.555	7.05773	<0.0001	201.1	9.86687	0.6342	4.4
		4080.92	1501.62	16.5235	0.000501826	136.4	12.8678	0.6489	5.4
		2457.22	1164.61	9.88822	<0.0001	175.6	14.1346	0.6374	7.4
		12514.2	1201.11	55.2778	0.00239295	35.4	11.8354	0.7963	2.1
		628639	795.57	3484.75	0.18772	0.381	22.6718	0.8421	0.91
		559329	587.36	3240.48	0.0878917	0.3032	27.4403	0.8464	0.64
		3098.3	743.375	13.3277	0.000111815	87.81	8.06546	0.7332	5.3
		57231.2	1116.01	256.586	0.00187938	7.222	12.0404	0.8321	0.88
		3375.06	1066.43	13.9982	<0.0001	116.4	7.17361	0.6798	5.5
1	MMRS-1-10 - R top	5469.5	897.189	21.464	0.000235378	65.89	5.07279	0.7355	3
		4249.84	876.929	16.9594	<0.0001	81.8	10.8551	0.7419	3.8
		2845.08	1079.81	10.6816	<0.0001	150.9	9.60613	0.6389	3.8
		1929.71	1035.03	7.06757	<0.0001	211.2	7.84109	0.5808	4.1
		4650.76	1163.62	18.4647	<0.0001	98.43	11.0553	0.719	4.1
		5509.46	646.815	22.0314	0.00523652	46.26	6.15055	0.7346	3.5
		2734.27	1299.89	9.96509	<0.0001	186.5	12.054	0.567	4.4
		3835.6	622.693	15.3981	<0.0001	63.72	11.3331	0.7348	4.4
		3479.53	1130.16	13.5293	<0.0001	125.8	16.9939	0.6548	7
		2856.22	358.695	11.5043	0.000171702	48.92	6.0297	0.727	4.3
		2653.94	1094.84	9.92797	<0.0001	161.5	13.2488	0.6072	7.5
		2579.98	878.201	9.2648	0.000279673	138.3	10.3635	0.6011	6
		3894.28	667.783	15.4448	<0.0001	67.17	14.5391	0.7093	4.8
		1890.76	978.03	7.01597	<0.0001	198.4	8.83663	0.5591	6.2
		2844.42	1292.9	11.0208	<0.0001	175.1	11.8989	0.6395	6.5
1	MMRS-1-10 - R base	964532	238.432	3995.68	1.21021	0.09921	5.60013	0.8347	0.58
		6865.29	1178.49	27.3993	<0.0001	68.55	7.0023	0.7555	2.2
		9749.62	1110.76	39.1626	<0.0001	45.64	20.4316	0.7733	3
		3134.27	618.562	12.0004	<0.0001	78.38	8.5986	0.6715	3.7
		2571.38	731.113	9.79997	<0.0001	112.4	3.28224	0.6552	3.2
		5670.59	941.277	23.0209	<0.0001	65.2	3.95169	0.7566	3.4
		3193.11	1019.37	12.355	0.000501291	125	7.15335	0.6643	5.1
		6429.29	528.903	25.9668	0.0134278	32.08	3.7738	0.7339	2.8	X
		6367.97	90.9386	20.5016	0.0173145	7.116	3.8453	0.7677	2.7	X
		2221.28	1098.3	8.32265	<0.0001	191.8	10.6453	0.5943	7.6
		2323.4	1192.06	8.81976	0.00012144	198.1	11.6671	0.6085	8.2
		2489.1	1200.78	9.34414	0.000753337	186	6.65737	0.5871	7.2
		3376.09	719.112	13.7125	0.000307273	81.56	13.1716	0.7112	5.1
9	MMRS-4-II - A	773.532	1362.78	4.69328	0.0034972	454.4	3.20332	0.7223	4.8
		1869.04	1621.18	7.58392	0.0042297	342.3	4.12091	0.7641	2.6
		834.897	1411.6	5.86364	0.00424214	377.7	4.16987	0.7269	3.3
		927.75	1485.58	6.34785	0.00448307	370.8	5.10779	0.7446	2.8
		1154.49	1620.26	7.22009	0.00323388	360.8	5.98039	0.7719	4.7
		1190.07	1082.94	7.46686	0.00902869	231.9	7.53967	0.7614	3.6
		1294.65	1031.55	8.30336	0.00888974	200.7	5.43593	0.7807	2.7
		1332.21	401.348	7.84797	0.00439093	83.41	4.70574	0.7983	4
		1787.58	617.069	11.8336	0.000809076	84.81	5.34831	0.7932	2.7
		4983.3	669.779	33.2259	0.000904135	33.26	5.60759	0.8203	1.6
		816.252	1285.31	4.55032	0.0029768	440.8	5.01037	0.7173	4
		585.679	444.847	3.26151	0.00149178	220.6	18.0971	0.7827	4.6
		1185.96	633.318	5.80498	0.00288226	174.9	10.8086	0.7659	2.9
		1321.8	1247.02	6.87978	0.00221731	289.4	12.8487	0.7586	3.5
9	MMRS-4-II - A-B transition	396.157	625.387	2.29242	0.000868637	428.4	6.85339	0.7286	3.9
		943.879	869.791	6.1545	0.00496862	224.6	4.42228	0.7502	6
		398.287	597.071	2.57754	0.00212323	360.1	7.00806	0.7102	7.3
		5919.04	859.083	37.8183	0.0591542	36.94	4.12195	0.793	1.9
		1979.54	654.088	12.4627	0.00701756	85.93	5.79309	0.8056	2.9
		615.411	640.021	3.30665	0.00104254	304.1	8.78449	0.7296	4.6
		1072.34	740.177	6.9987	0.00494593	170.1	7.62791	0.7725	5.2
		11210.7	779.36	73.5342	0.122678	17.35	2.32939	0.8054	1.8
		41688.9	1175.11	267.805	0.261708	7.248	1.67847	0.8222	1.1
		5794.2	847.533	38.0646	0.0320319	36.22	3.77098	0.7936	2.7
		3732.66	2156.97	24.3411	0.00774766	143	9.29556	0.7784	2.6
		5287.39	1758.72	34.7007	0.0180223	82.74	2.7516	0.8	2.7
9	MMRS-4-II - C	2603.96	1428.54	16.1562	0.0131196	143.5	5.0059	0.7887	3.8
		2974.39	2261.08	17.3847	0.00913124	207.1	6.06996	0.754	2.5
		1739.73	742.148	8.2617	0.00800144	145.3	4.94301	0.7827	3
		2963.81	1530.47	17.6801	0.014683	141	3.84869	0.7952	2.9
		32269	1145.78	197.082	0.258597	9.55	2.1807	0.8118	1
		16128.1	2016.06	98.2321	0.0549624	33.7	1.91192	0.811	1.7
		2481.97	996.838	15.318	0.00371146	105.1	4.48167	0.7805	4.3
		1608.53	650.415	7.10203	0.0105329	147.1	6.89255	0.7696	3.6
		6294.5	1557.38	37.8397	0.0181298	67.22	3.15305	0.801	2.3
		5748.56	2769.73	35.4909	0.0115157	127.2	3.63404	0.7965	2.3
		9109.2	2369.36	55.7935	0.0179237	69.19	2.76342	0.7964	1.7
		12271.4	867.019	72.9849	0.0591788	19.48	5.81937	0.8087	1.3
		26333.1	1580.72	162.538	0.117205	15.98	4.26615	0.8128	1.4
		13226	1432.56	82.2324	0.0581522	28.51	1.90573	0.8044	1.5
		7038.11	2110.89	33.7826	0.015836	102.5	8.81804	0.8088	2.9
		6196.84	1658.72	37.4272	0.0268135	72.71	7.30189	0.8094	2.3
		8033.07	1590.05	48.9927	0.0312711	53.52	2.64692	0.819	2.1
		1201.38	781.951	7.53862	0.00838619	167.1	5.68506	0.7752	6.7
		1296.82	749.872	8.31676	0.00497567	144.2	12.6378	0.7623	3.4
		21654	1261.46	133.876	0.113033	15.54	2.30809	0.819	1.1
		747.114	634.286	4.3789	0.00475591	230.6	4.71475	0.7538	4.3
		997.412	655.066	6.46871	0.0109447	162.2	3.581	0.7643	3.5
		12032.9	1464.34	74.9365	0.046627	32.09	2.36466	0.8113	1.5
		19191.9	1269.94	118.564	0.0889611	17.7	2.07229	0.8234	1.6
		21126.2	1189.22	132.549	0.115773	14.71	2.82654	0.8085	0.97
		2042.99	834.761	12.2362	0.0161976	111.7	3.28347	0.8048	3.5
		1490	898.928	9.22854	0.0109288	157.3	3.74447	0.78	2.8
		4848.46	2232.14	30.7133	0.00696933	117.9	2.52421	0.7887	1.7
		2045.27	3317.35	13.4557	0.00285847	382.3	4.11961	0.706	2.4
		10928.4	3138.91	69.3422	0.0246009	73.5	2.68914	0.7901	2.1
		8878.73	1973.31	54.2925	0.0188666	59.82	2.91587	0.8154	0.92
		845.068	832.661	5.41285	0.00645717	245	4.76955	0.7543	4.1
		625.149	851.718	3.92167	0.00339447	341.7	4.13915	0.7322	3.9
		2639.53	982.97	14.5836	0.0142627	109.2	8.41935	0.7854	3.6
		910.091	647.036	6.06286	0.0102187	171.2	3.2569	0.7671	5.6
		3691.38	4298.27	23.7293	0.00397646	288.9	2.44093	0.7568	1.6
		4571.03	3965.64	30.7645	0.00884634	207.6	5.87377	0.7746	2.6
		3186.82	4303.25	19.9644	0.0038197	341.6	2.47985	0.7453	1.5
		3146.02	2971.57	21.4171	0.00465077	221.5	5.31385	0.7586	3.8
9	MMRS-4-II - D base	3673.32	1134.38	20.7068	0.00441663	89.43	4.21075	0.8	2.8
		14094.5	967.223	77.7007	0.00205338	20.69	11.7815	0.8338	1.3
		5897.71	1192.81	33.6117	0.00369182	58.19	5.16619	0.8083	2.1
		28863.5	905.99	157.8	0.00566781	9.506	5.22367	0.8268	1.5
		3937.56	950.798	19.5231	0.00503339	80.12	4.36723	0.8146	1.9
		5505.94	1215.52	31.7991	0.00243395	62.47	4.11566	0.8021	2.3
		1738.44	1309.51	8.79963	0.00277101	239.6	8.58184	0.7741	3.1
		739.492	1267.4	4.56858	0.00128465	434.3	5.82591	0.7232	6.4
		686.708	1252.57	4.0844	0.0022096	479.4	5.72197	0.7203	4.9
		3912.5	1019.39	22.4183	0.00271404	74.79	4.32648	0.8142	2.1
		2364.26	1259.21	13.6046	0.0121123	148.8	4.6859	0.7713	2.2
		8106.01	1122.86	47.2264	0.0118937	39.22	10.428	0.8198	1.9
		1721.35	1128.25	8.05579	0.00583724	225.8	8.28066	0.7765	2.3
		2297.35	1295.82	13.4977	0.00108645	156.1	5.10475	0.7925	2.6
		970.41	1231.78	6.0082	0.00181191	323.2	6.18408	0.7357	5.7
		10491.5	1312.64	46.3135	0.00676531	46.47	13.585	0.8083	2.3
		863.042	987.352	4.64852	0.00197478	337.3	5.42645	0.7492	3.7
		1776.85	1057.79	10.5652	0.0015742	161.3	9.08401	0.7752	2.2
		6986.46	1027.8	38.2984	0.0015891	44.45	5.93923	0.8273	1.5
		2580.51	1384.08	15.1775	0.00650054	146.8	7.96898	0.7735	2.8
		2843.71	1306.51	16.7672	0.0424688	125.7	3.54053	0.7773	3.3
		2080.08	1123.81	11.8185	0.00986525	153.2	5.18061	0.7756	3
		1548.07	1113.06	8.92895	0.00541911	199.3	6.89036	0.7613	3.2
		3061.1	1276.1	18.0477	0.00422032	113.9	10.8718	0.7751	3.2
		1408.39	988.676	8.51286	0.00782633	187.6	6.20115	0.7799	3.6
		1193.64	994.477	7.02912	0.0045135	226.3	7.17319	0.762	4
		1479.73	934.685	9.21252	0.00537835	163.3	12.9481	0.7735	3.1
		2736.89	1078.32	16.258	0.0173002	107	7.088	0.7775	3
		3214.62	1373.35	19.6406	0.0179514	113.8	3.14328	0.794	2.3
		4148.9	1909.48	20.558	0.0154245	150.4	4.03627	0.7842	3
		5854.92	2132.94	30.5516	0.0249146	114.6	2.50222	0.8108	3.8
		1092.98	1011.54	6.13622	0.00859838	261.6	4.53922	0.7474	4.4
		417.688	962.783	2.76101	0.00149037	536.9	5.43869	0.6933	4.6
		10902.8	783.537	62.5311	0.00245662	20.82	2.73454	0.8333	1.7
		22045	683.51	125.639	0.00176859	9.031	13.2863	0.8318	1.5
		1879.67	1060.57	9.37276	0.00124225	181.8	10.0682	0.7702	3.1
3	MMRS-4-II - F top	4796.32	478.957	14.3807	0.0116263	54.46	3.1596	0.803	2.6
		8102.36	397.738	24.321	0.0318352	26.88	3.90338	0.813	2.6
		154633	492.616	462.769	0.0204413	1.77	9.55731	0.835	0.64
		2916.93	392.994	8.82127	0.0135505	72.7	3.80798	0.7993	2
		9414.91	461.41	28.5681	0.0520933	26.67	4.02106	0.8215	1.5
		5372.39	452.487	16.2463	0.0276379	45.67	4.91785	0.8083	3.8
		17347.3	641.092	50.1833	0.0105741	21.13	24.6011	0.8251	2
		77813.9	570.196	238.648	0.0120011	3.967	3.54442	0.8323	0.92
		14023.8	561.487	42.9854	0.0120953	21.6	16.8433	0.8244	2
		29954.2	618.394	90.1898	0.0226085	11.35	19.2349	0.8263	1
		161200	580.565	495.69	0.0555868	1.949	6.98754	0.8361	0.61
		83969.7	553.994	257.293	0.0257338	3.573	9.71773	0.8312	0.95
		175930	563.4	544.113	0.033666	1.722	6.09024	0.8348	0.62
		163515	554.895	508.679	0.0283159	1.814	12.6	0.835	0.51
		13207.8	466.064	40.2828	0.0220936	19.16	8.57897	0.8275	2.1
		7650.05	564.972	23.4978	0.0150051	39.52	15.3199	0.8131	1.6
		5885.04	416.599	18.0145	0.0193836	37.99	11.7605	0.8121	3.2
		9141.84	564.37	28.2356	0.0242922	33.02	8.06106	0.8226	1.5
		17912.3	554.9	55.7474	0.0355745	16.48	5.25985	0.8262	1.3
		16816.1	484.202	52.832	0.0391544	15.12	2.89976	0.8196	0.94
		34589	500.098	105.968	0.0328237	7.803	12.0345	0.8242	1.2
		25422.6	610.326	79.7979	0.0418895	12.6	7.14017	0.8178	1.7
		39362.8	560.758	123.93	0.0299134	7.508	8.35976	0.831	1.1
		161399	602.661	519.949	0.149642	1.927	3.94937	0.835	0.54
		71955.4	513.536	228.976	0.0215898	3.725	12.9153	0.8328	0.75
4	MMRS-4-II - G base	11575.7	787.587	61.301	0.00700199	21.09	9.79834	0.8104	1.6
		1439.5	722.02	7.5289	0.00385949	154.6	5.9875	0.7762	4.5
		1213.39	620.408	6.30142	0.00332155	154.9	4.87022	0.7319	3.5
		6719.18	762.308	36.3984	0.0085533	34.85	4.60093	0.8361	1.6
		1431.63	755.609	7.52404	0.00518146	162.5	5.55579	0.7837	3.5
		2057.28	783.228	10.5451	0.0112055	118.8	6.27518	0.7617	3
		4001.57	688.274	21.29	0.0058469	52.62	5.72007	0.7946	2.9
		1564.3	548.545	8.31646	0.00327305	107.4	4.55609	0.7959	4
		1298.28	739.359	6.78399	0.0052995	174	4.60813	0.759	5.2
		2509.82	762.819	13.0954	0.00664883	94.13	14.4395	0.7811	3.3
		8082.99	677.984	43.9108	0.00743146	25.48	5.03197	0.8206	1.2
		5759.78	644.349	30.9204	0.00466185	34.27	9.65183	0.8136	2.1
		2105.81	654.126	11.0692	0.00504822	95.77	15.7056	0.7864	3.3
		1995.7	719.392	10.4519	0.00992178	111.3	8.20696	0.7816	3.1
		3452.93	692.612	18.1372	0.00620158	62.19	13.4857	0.7956	3.1
		908.618	435.603	4.77023	0.00671306	146	5.52142	0.7613	5.1
		1438.15	521.627	7.62059	0.00274872	111	6.64947	0.7878	5
		1296.3	623.463	6.90064	0.00773845	145	4.56609	0.7688	3.8
		1776.43	655.297	9.49892	0.00491789	112.1	7.62052	0.7913	3.3
		1582.67	596.703	8.26987	0.00426865	116.5	12.6976	0.7795	3.8
		3378.96	461.749	17.9095	0.00477301	42.14	18.5406	0.8025	3.2
		1577.1	452.35	8.14386	0.00729349	89.37	13.713	0.773	2.7
		7485.79	638.685	39.9126	0.0119709	26.27	18.0005	0.8107	2.1
		6801.22	536.67	36.7694	0.0119619	23.96	14.5622	0.8103	2
		5995.23	407.473	32.1202	0.0121501	20.87	10.6905	0.8148	1.6
		14713.1	473.517	81.4934	0.0236994	9.646	12.6608	0.8319	1.6
		10879.8	511.897	59.3523	0.0103432	14.25	13.549	0.8228	1.8
		3052.4	389.669	16.8544	0.0198215	37.92	10.0799	0.809	3.5
		29630.7	379.329	163.438	0.0171443	3.844	4.43008	0.8276	0.92
		1960.03	443.901	10.7411	0.0160782	66.98	6.89419	0.7864	3.7
		1627.82	419.281	8.81785	0.00601032	77.2	6.31998	0.7899	4.4
		2621.37	438.516	14.3066	0.012819	50.24	9.86024	0.8076	3.7
		1871.63	477.779	10.2095	0.0157459	76.29	7.44591	0.7976	3.9
		1366.58	484.67	7.66551	0.00864736	103.2	9.52494	0.7995	2.6
		2171.42	571.375	11.7975	0.0191892	78.4	3.25279	0.7842	2.7
		11539.7	518.149	63.9206	0.020369	13.4	8.08847	0.8235	1.3
		2563.55	532.111	14.0049	0.0160051	61.91	9.76979	0.7965	2.9
		3230.23	587.312	17.8575	0.021078	53.84	7.95018	0.8052	2.6
		5349.83	576.003	29.4166	0.0362	31.91	12.3076	0.797	2
		3359.92	566.892	18.3818	0.0211597	50.15	9.61909	0.7928	2.1
		2777.63	551.371	15.3466	0.0210068	59	7.76501	0.8113	2.7
		2485.42	502.806	13.5754	0.0172483	59.87	8.32631	0.7816	3.6
		2097.02	523.941	11.5897	0.0185023	72.84	3.95147	0.7757	2.4
		6042.81	531.975	33.9961	0.0309742	25.78	12.2065	0.8176	2.1
		1706.91	493.277	9.6023	0.0291038	82.68	5.50871	0.7736	3.9
		3824.6	565.909	21.1641	0.0425276	43.62	6.32239	0.7988	2.4
		6800.67	537.373	38.1398	0.0319144	23.1	12.4603	0.8082	2.2
		1499.34	470.289	8.32239	0.0224423	92.55	8.10686	0.8061	3.2
		14597	300.062	82.4464	0.0295202	6.016	3.15061	0.8235	1
		4772.5	372.689	26.7719	0.0150696	22.87	16.8058	0.8116	2.2
		1089.77	348.204	6.02331	0.00555457	94.2	13.6202	0.7965	4.5
		4270.82	256.62	24.0014	0.00839616	17.77	17.8529	0.8335	2.8
		2118.62	247.743	11.9459	0.0171568	33.71	15.9354	0.7919	3.4
		2541.62	347.219	14.1117	0.0134179	40.06	14.4718	0.7949	3.9
		5916.11	307.988	33.6096	0.0155349	15.25	17.3365	0.836	2.2
		3493.86	328.376	19.8417	0.0334531	27.42	13.4566	0.8283	1.8
		11269.2	294.657	64.2143	0.0231365	7.609	9.22109	0.8298	1.4
		10243	317.117	58.0371	0.0261828	9.049	8.47831	0.8272	1.4
		25827.1	236.953	148.182	0.0498397	2.66	5.90333	0.8358	0.82
		3843.31	288.386	21.7408	0.0251642	21.75	7.29731	0.8081	2.5
3	MMRS-4-II - G base	2083.01	821.367	5.6582	0.00295097	226.4	7.17089	0.7164	3.7
		6256.56	810.358	17.9521	0.00277025	73.81	10.4395	0.803	3.6
		63139.8	842.243	183.574	0.00536529	7.619	7.51618	0.8324	0.78
		2876.53	885.337	8.04709	0.00474929	174.9	8.1834	0.7512	1.9
		56862.9	894.815	166.462	0.0145216	8.928	7.78052	0.8328	0.89
		16492.7	859.99	47.4222	0.0105901	29.9	24.7299	0.8185	2.5
		8854.43	850.988	25.7094	0.00611431	54.44	11.5345	0.8141	2
		10693.7	812.912	31.1147	0.00693324	42.85	14.7208	0.8089	1.5
		23067	802.744	68.6552	0.00715752	19.34	14.2806	0.8248	1.5
		74680.9	750.234	221.312	0.00406965	5.646	6.53636	0.8381	0.72
		7462.67	906.574	21.5347	0.010875	68.68	12.0429	0.7989	2.8
		9931.2	779.928	29.2318	0.0101681	43.66	9.17688	0.8046	1.7
		3326	934.332	9.5013	0.00676964	156.5	4.187	0.7533	3.3
		14867.5	758.022	44.4288	0.00543415	28.24	10.7947	0.8259	1.2
		22325.3	857.967	66.4981	0.00937168	21.38	7.95421	0.828	1.2
		16666.1	960.921	49.3902	0.00413739	32.1	13.5226	0.8203	1.2
		49412.5	885.116	147.694	0.00697005	9.953	3.03186	0.8325	1.1
		8897.77	935.189	26.2076	0.0102235	58.39	11.8215	0.8045	2
		8511.93	871.771	24.9755	0.225215	57.04	15.2277	0.8019	1.8
		3773.05	728.106	11.0607	0.0113968	106.4	4.60404	0.7809	2.4
		4383.5	1250.68	12.6545	0.00534943	157.5	5.57126	0.7559	1.8
		7632.54	785.018	22.3315	0.0219629	57.37	11.0009	0.7995	2.2
		2741.57	844.821	7.84362	0.00472866	169.7	6.30812	0.7346	3.2
		6407.09	670.031	19.0655	0.0153804	57.62	17.608	0.8081	2.7
		5926.81	486.858	17.5076	0.0440816	45.6	12.6415	0.8087	1.9
3	MMRS-4-II - J base	11751	434.1	33.4014	0.000297952	21.4	14.0568	0.8162	2.1
		5418.98	345.186	15.272	0.000666435	37.31	6.08767	0.8209	1.7
		1214.63	236.227	3.23494	0.00369479	114.4	12.4058	0.7242	6.3
		5445.86	298.308	15.1839	0.0011889	32.7	16.4343	0.8371	1.8
		17569.7	492.203	49.8391	0.000948437	16.42	4.01106	0.8344	1.5
		1624.58	282.681	4.47284	0.00122579	101.5	16.0956	0.7704	3.2
		844.153	292.86	2.20309	0.000452683	204.1	15.2839	0.6882	6.3
		7486.69	410.085	20.9296	0.000311547	32.31	14.4508	0.8192	2.5
		582.878	299.655	1.4498	0.000442966	301.1	10.7349	0.5978	11
		1149.9	192.789	3.12211	0.00312205	98.27	13.6	0.7529	5.5
		290.219	269.924	0.676111	0.000515037	540.5	9.31856	0.4797	12
		4543.47	299.798	12.9726	0.00200893	38.12	11.2153	0.8196	2.2
		1939.25	483.007	5.26239	0.00174339	147	15.0226	0.765	2.7
		10102.9	547.16	28.7693	0.00130121	31.35	10.535	0.8183	2
		17465.5	486.992	49.069	0.000329155	16.45	10.729	0.8283	1.2
		2815.06	286.879	8.01783	0.00175957	58.54	15.3983	0.8041	2.8
		5340.34	286.621	15.1812	0.00266278	31.35	8.31916	0.8323	2.5
		3331.15	316.484	9.32825	0.00271762	55.24	10.0704	0.795	2.9
		4923.18	321.592	13.8148	0.00188322	38.22	19.7189	0.811	2.3
		7784.29	376.467	22.4751	0.00541458	27.9	18.4306	0.838	1.8
		771.625	230.361	2.11236	0.00233384	171.5	12.2663	0.7315	7.9
		2060.01	445.169	5.86395	0.00130979	122.3	11.1553	0.7758	2.8
3	MMRS-8 - B	17500.4	2334.69	67.3735	0.00106079	55.3	3.6395	0.7578	1.7
		11599.9	1125.4	44.5962	0.00109301	40.14	2.75266	0.7519	2.1
		13165.1	1611.46	50.5746	0.00100265	50.68	5.06575	0.7517	2.1
		18411.9	2931.87	71.1621	0.00360535	65.81	4.61616	0.7597	1.1
		17802.6	3037.41	68.5197	0.00364144	70.47	2.62942	0.7508	1.3
		10676.5	1842.89	40.4206	0.000851244	70.97	3.38713	0.7127	1.6	X
		25033.7	1034.23	98.0996	0.000235983	17.21	9.11875	0.8004	0.85
		16067.6	916.794	63.4637	0.00206244	23.42	5.25023	0.7874	1.4
		14545.6	2453.38	56.9388	0.00358261	69.15	3.7659	0.7683	0.98
		11312.2	2060.21	43.6643	0.0016313	74.58	2.6013	0.7405	1.3
		16266.1	2501.01	63.8714	0.00267597	62.71	4.37508	0.7644	1.2
		10391.9	2270.26	39.8107	0.00115773	89.13	2.48141	0.7201	1.6
		22262.9	2499.51	88.3039	0.000764397	45.45	11.6696	0.7693	1.5
		25588.6	2104.61	102.037	0.000855519	33.35	8.58956	0.7821	1.2
		9751.47	992.561	37.6243	0.000276971	41.49	4.48496	0.7311	1.8	X
		20247.1	2690.21	80.6353	0.000369778	53.59	9.87363	0.77	1.5
		22363.8	2262.16	89.6989	0.000407216	40.97	9.34243	0.7908	1.1
		54935.3	2698.81	224.43	0.0670719	19.65	2.84428	0.8016	0.8
		11321.2	1031.74	45.6055	0.000385725	36.19	6.77421	0.7624	1.5
		24727.9	2505.94	102.114	0.0208629	39.99	6.5285	0.7967	1.3
		22284.9	900.821	91.451	0.000850688	16.14	7.98001	0.8068	1.1
		27189	979.332	112.904	0.000577806	14.2	11.6156	0.8047	1.2
		25692.6	1180.74	105.574	0.000610273	18.23	11.5923	0.7973	0.98
		29812.2	595.261	123.244	0.00115563	7.895	11.2255	0.8026	1.1
		31395.5	676.221	130.595	0.00111913	8.554	9.28022	0.8224	1
		30436.9	1164.61	126.634	0.000820691	15.09	12.3614	0.8092	1.2
		23264.8	2424.54	97.0636	0.00981529	40.77	5.29335	0.7998	1.2
		22589	586.62	94.5695	0.0012868	10.18	6.5122	0.8096	1.2
		16556.2	576.614	68.4294	0.000703134	13.74	6.72221	0.7981	1.5
		13758.5	540.122	56.1503	0.0037318	15.65	10.0644	0.7938	1.3
		11536.9	715.676	48.0337	0.0012041	24.12	5.00166	0.7846	1.5
		18619.6	713.873	77.2556	0.00130702	15.1	12.1408	0.8022	1.2
		19710.8	1045.68	81.659	0.00170541	20.9	12.3648	0.7993	1.6
		15246.5	551.081	63.9285	0.000764683	14.19	9.87129	0.8161	1.8
		19588.1	1100.72	82.1654	0.00879822	21.86	5.43628	0.7988	1.4
		16028.1	718.366	67.7273	0.0201834	17.33	12.5153	0.8021	1.7
3	MMRS-8 - C	8973.08	2091.36	29.71	0.00085835	111	6.28533	0.7354	1.8
		2583.38	1034.12	8.42029	0.000688182	188.4	6.00766	0.6872	5.7
		1368.4	1024.14	4.13372	<0.0001	351	10.0685	0.5521	6.7
		1649.18	939	5.25187	0.000338885	267.8	6.40633	0.6453	4.3
		8427.83	2429.73	28.3135	0.00108095	135.7	5.13974	0.7408	1.8
		3627.25	1346.89	11.6828	0.00102859	177.3	9.53469	0.6909	3.4
		1680.94	951.477	5.16567	0.000481249	270.2	17.8507	0.6096	7.1
		2190.69	880.391	7.19805	0.0011764	189.3	14.3246	0.7028	5.1
		1747.17	866.633	5.66881	0.000671772	230.8	14.9869	0.6592	5.1
		1941.16	870.338	6.41503	0.000675775	211.8	17.1072	0.7176	4.3
		3098.44	1048.77	10.11	0.000885521	159.9	14.5466	0.6951	4.2
		2364.5	935.597	7.85733	0.000720216	183.5	15.4858	0.6949	5.8
		1467.49	838.08	4.57528	0.000943901	266.3	14.4702	0.5946	6.6
		3091.92	872.09	10.4483	0.00093381	131.7	20.9869	0.7375	4
		2107.19	1175.97	6.62687	0.00102588	264.1	11.6139	0.6343	4.7
		1315.5	855.177	4.25931	0.00130452	297.4	13.8259	0.6258	7.8
		1585.34	837.121	5.24348	0.0010167	242.8	13.6944	0.6713	6.6
		1663.29	854.529	5.42078	0.00131156	237.6	16.6241	0.6562	5.9
		1911.16	940.94	6.35504	0.00101802	225.1	13.9811	0.6712	5.3
		1602.49	986.902	5.1449	0.00139631	281.7	13.0185	0.6117	6.2
		1188.86	855.626	3.74141	0.00126653	329.8	10.962	0.5813	9.2
		1609.05	865.479	5.21768	0.00108384	245.4	15.599	0.6241	6.5
		1940.5	953.598	6.36765	0.00091611	224.2	13.8257	0.6444	6.3
		2470.67	836.818	8.45595	0.00206041	155	15.7697	0.724	3.8
		1442.79	983.782	4.67031	0.000837954	310.8	10.8696	0.6195	6.7
		1432.01	827.773	4.71265	0.00199231	259.3	14.0805	0.6202	6.8
		1654.72	823.355	5.69449	0.00168327	222	12.5873	0.6884	5.1
		840.397	777.101	2.64917	0.00176526	414	7.08	0.5457	7
		1938.07	885.376	6.67472	0.000693305	204.5	12.908	0.6954	5
		1455.86	795.299	4.87568	0.00152915	243.9	16.3981	0.6425	7
		1858.73	814.428	6.30182	0.00136991	194.9	20.1771	0.6566	7.6
		1482.2	825.066	4.96829	0.000883654	245.8	10.7898	0.6248	5.8
		790.46	834.935	2.4996	0.00072635	468.5	9.91965	0.5356	8.5
		1121.4	818.832	3.70906	0.00117044	323.8	14.0089	0.6096	5.9
		667.866	841.237	2.02309	0.000346217	557.2	8.94519	0.4636	8.4
		1340.45	919.818	4.49915	0.00079243	300.1	17.0561	0.6105	9.1
		1954.29	943.359	6.61039	0.000776222	213.5	15.3754	0.6428	7.4
		1058.91	797.437	3.50121	0.00117572	330.1	12.2108	0.5895	7.4
		820.799	762.707	2.56381	0.00189226	412.1	7.24441	0.5156	6
		1761.68	948.216	6.02481	0.00341178	239.3	12.4045	0.6711	5.1
		1346.09	808.872	4.51369	0.00196342	263.3	13.9473	0.6123	6.8
3	MMRS-8 - E top-E base	2606.46	1210.84	7.36346	0.000699345	243	19.611	0.6221	4.3
		5152.82	2332.18	16.9183	0.00776064	210.8	8.53258	0.681	4.8
		2465.57	1119.85	7.03193	0.00118177	236.8	15.9603	0.6325	6.7
		1793.75	1291.96	4.886	0.00128214	374.4	8.34789	0.5511	4
		4340.26	1185.61	12.8687	0.0101201	143.1	6.49715	0.7083	2.3
		3984.65	1542.83	11.6942	0.00202242	198.9	12.7523	0.6563	6.5
		1775.21	1119.19	4.78138	0.00104998	331.2	10.4523	0.5497	8
		1455.59	1279.45	3.84526	0.000967228	455.7	7.21579	0.4975	8.2
		2689.12	1252.97	7.70136	0.00144502	241.9	12.3009	0.6325	7.2
		1198.86	1269.81	3.02865	0.000913754	545.9	6.24727	0.4201	8.5
		1433.87	1095.35	3.71032	0.00145779	395.2	11.7489	0.4622	8.5
		1367.65	1096.55	3.67624	0.000495978	414.6	9.01978	0.5211	8
		1501.95	903.449	4.131	0.00124379	311.4	12.8247	0.56	9.2
		1686.12	1158.38	4.37367	0.000292603	360.8	14.049	0.4894	9.5
		2001.64	1719.1	5.16392	0.000300319	434.2	8.25291	0.4225	6.8
		1273.74	1178.15	3.39012	0.00122085	471.8	7.41764	0.4839	7.3
		1432.25	1155.93	3.85727	0.000951039	411.1	7.51288	0.5001	6.9
		2619.02	1199.54	7.7126	0.000704796	234.6	9.00659	0.6575	8.7
		1417.46	1276.45	3.76622	0.000375942	457.1	8.26054	0.4738	6.6
		3119.57	1312.99	9.64494	0.000909416	210.3	16.9163	0.6996	3.8
		1464.91	1158.25	4.01543	0.0010248	396.5	4.4952	0.5036	5.9
		2210.61	1204.73	6.46828	0.000961355	272.4	16.594	0.6047	5.8
		2618.63	1045.67	7.84301	0.00244017	201.6	17.2685	0.6618	5.7
		2105.72	1141.91	6.10498	0.00070872	274.6	14.3715	0.6112	7.2
		2945.53	2599.13	8.15425	<0.0001	437.7	11.5017	0.502	10
		2213.74	838.24	6.69308	<0.0001	190.9	15.6073	0.6759	9.6
		1780.88	917.658	5.0538	<0.0001	260.4	18.3346	0.5719	8
		1796.7	807.058	5.44552	<0.0001	224.8	13.9355	0.6673	6.2
		1578.91	911.2	4.5451	<0.0001	289.9	15.1488	0.5857	8.5
		1267.11	899.707	3.51887	<0.0001	354.2	10.3249	0.5158	7.5
		1649.15	896.296	4.84083	<0.0001	268.7	15.4027	0.5913	7.8
		1528.84	850.807	4.37271	<0.0001	275.2	17.7795	0.5495	8.9
		2759	1039.99	7.46325	<0.0001	188.7	13.7135	0.4801	11	X
		3639.9	5747.18	8.67976	<0.0001	766.4	7.04942	0.2537	16
		1285.52	613.33	3.88384	<0.0001	233.3	20.8331	0.6216	9.9
		4207.06	7139.12	9.06634	<0.0001	838.3	3.41692	0.147	9.5
		2156.2	950.892	6.5721	<0.0001	215.1	15.8008	0.6326	5.5
		1845.05	1522.98	5.21742	<0.0001	390.2	19.0863	0.4601	12
		3089.01	2370.75	8.57754	<0.0001	379.4	16.587	0.5014	10
		1344.46	847.08	3.94062	<0.0001	310.9	12.6919	0.586	8.4
		797.211	353.441	2.33167	<0.0001	217.4	13.9097	0.5717	9.6
		2519.86	1443.03	7.42923	<0.0001	280.6	18.3284	0.5839	8.1
		2752.12	2303.9	8.13434	<0.0001	390.2	14.3783	0.5071	11
		4234.54	6315.3	9.81648	<0.0001	723.7	5.83498	0.2162	15
		1863.56	1482.5	5.46604	<0.0001	385	9.46738	0.555	5.9
		1855.29	1362.12	5.59204	<0.0001	352.3	14.6548	0.5861	8.9
		885.575	502.743	2.68382	<0.0001	270.8	15.1001	0.5853	7.6
		1662.01	561.81	5.41228	<0.0001	161.4	16.302	0.7109	4.9
		3978.31	1290.39	13.3478	<0.0001	152.3	16.212	0.7349	5.9
		1959.85	901.076	5.53147	<0.0001	217.9	6.78921	0.4608	7.1	X
		2208.53	624.389	7.26177	<0.0001	135.3	18.0396	0.7326	4.3
		1457.19	690.568	4.41999	<0.0001	225.6	19.4601	0.5835	10
		2596.2	3068.38	6.89819	<0.0001	569	11.3775	0.3938	15
		1601.65	1026.58	4.69765	<0.0001	314.5	16.2725	0.5777	7.3
		1304.57	1494.24	3.56293	<0.0001	541.6	11.2132	0.4077	13
		1727.28	2014.09	4.74283	<0.0001	557.6	11.0306	0.4327	12
		3824.86	5580.15	9.55752	<0.0001	701	10.4146	0.3033	13
1	MMRS-8 - F	977.803	1297.33	5.26617	0.00216891	346.7	5.62007	0.541	8.4
		2479.95	1313.56	14.7252	0.00434293	139.4	14.0748	0.7201	7.3
		883.965	977.101	4.94092	0.00517828	288.9	6.76026	0.6029	3.7
		795.944	967.995	5.02319	0.00449626	281.7	7.12447	0.6038	5.3
		918.891	818.624	5.20487	0.0025707	233.3	17.2777	0.6285	5.9
		2177.75	1095.63	12.9395	0.00474508	132.2	13.6274	0.7184	3
		924.229	692.674	5.31373	0.00210384	197.2	18.6573	0.6627	8.8
		2013.62	958.171	12.2871	0.0137852	123.4	11.1014	0.742	3.1
		2508.17	159346	2478.5	0.00614167	102.6	19.1798	0.7573	3.5
		1588.63	1322.32	9.24068	0.00731722	215.1	9.85793	0.6512	4.8
		1161.52	1256.49	6.61359	0.0041703	276.8	11.1322	0.5981	5.2
		2644.47	1203.15	16.0868	0.0137891	118.7	10.7076	0.7484	4.3
		1616.96	1839.81	8.85081	0.00329521	298.5	11.8811	0.5742	7.7
		1578.74	1686.7	8.85864	0.000935273	274.5	13.3311	0.5807	7.7
		1288.97	1530.25	8.25355	0.00221715	267.5	24.0892	0.582	8.6
		1788.7	1503.4	10.195	0.00331396	216.9	26.4139	0.6139	10
		1631.55	1505.59	9.58048	0.00239876	230.3	17.2442	0.6082	7.8
		1136.97	622.161	6.94859	0.00234264	139.6	22.2564	0.7158	6.4
		1737.41	1234.33	10.3993	0.00430505	180.9	11.7829	0.6757	5.9
		1912.16	1753.36	10.9325	0.00252581	233	22.5207	0.5931	6.4
		942.543	1606.68	5.05899	0.00101774	432.2	15.7733	0.4877	11
		1341.11	1509.21	7.62693	0.000390968	286	17.0138	0.5847	9.2
		3183.84	1621.38	19.7804	0.014176	128.6	6.54277	0.7269	3.4
		1513.51	1555.82	8.85014	0.00378396	257	13.8699	0.6042	5.1
		2039.18	1404.3	12.4714	0.00768264	173.7	10.6163	0.6971	4.4
		2957.38	1440.44	18.2689	0.00935935	123.1	14.946	0.7188	4.9
		1144.58	1691.2	6.37594	0.00166426	371.4	12.6945	0.5327	9.1
		2260.51	1762.72	13.4569	0.00245287	195.6	12.844	0.6402	5.3
		2120.51	1930.89	12.7861	0.0039478	226.8	12.8859	0.6495	6.5
1	MMRS-8 - G	1749.58	1861.77	9.1671	0.00102308	292.4	17.5966	0.5784	7.1
		2167.45	895.737	12.2306	0.00167243	113.2	28.6303	0.7005	6.7
		1025.96	1465.62	5.12486	0.000426554	392.8	16.4553	0.5021	12
		1230.16	1203.41	7.18328	0.00145636	248.9	14.9392	0.6314	6
		1293.49	991.29	7.08223	<0.0001	207.1	9.48559	0.6245	9.2
		595.732	1010.66	2.93162	<0.0001	456.7	6.52723	0.4462	12
		769.604	1078.33	3.7002	0.000102889	376.8	10.7139	0.4095	11
		893.543	1492.79	4.09728	<0.0001	447.2	6.54915	0.3341	6.1
		5523.62	1677.86	32.461	0.00362847	81.84	8.46731	0.7435	2.8
		7126.43	1630.02	42.5555	0.00943363	61.42	7.65312	0.7667	2.4
		1878.41	1353.21	10.4813	0.00109045	192.3	17.1761	0.6357	6
		22752.1	1678.34	139.094	0.0616065	19.73	2.83542	0.803	1.2
		21296.5	1649.3	131.474	0.0635189	20.54	4.18361	0.8056	1.4
		19359.6	1715.32	118.695	0.0644316	23.6	2.6872	0.8006	1.5
		24936	1707.55	153.542	0.0785685	18.2	2.90949	0.8049	1.4
		22080	1679.9	136.526	0.0913782	20.19	2.98353	0.8098	1.2
		28362.4	1748.63	176.006	0.0758973	16.42	7.96869	0.8231	2.1
		17624.6	1605.6	108.825	0.0341461	24.09	4.01676	0.8	1.9
		10617.5	1605.16	65.3808	0.0282042	40.01	3.99223	0.7967	1.8
		17254.3	1336.32	106.971	0.0588544	20.41	4.35523	0.802	1.6
		13990.5	1431.69	87.6957	0.0548567	26.85	3.41486	0.8142	1.5
Spot size = 380 µm; depth of crater ~15µm. 206Pb/238U error is - with exception for the SRM614- the quadratic additions of the within run precision (2 SE) and the estimated external reproducibility of 2% (2 SD) based on NIST SRM-614 and WC-1 reference. 207Pb/206Pb error propagation (207Pb signal dependent) following Gerdes & Zeh (2009). Mean background for 206Pb, 207Pb and 238U was 22
a Within run background-corrected mean 206Pb signal in cps (counts per second).
b U and Pb content and Th/U ratio were calculated relative to NIST SRM-614 soda lime glass.

## Sheet: Maale Deragot (MDRG) Raw data
Ma`ale Deragort (MDRG) data
Measurement	sample	206Pba	Ub	Pbb	Thb	238U d	±2s	207Pbd	±2s	Excluded
Sequence		(cps)	(ppb)	(ppb)	U	206Pb	(%)	206Pb	(%)	measurement
5	MDRG-2-I - E-D	44492.3	618.21	132.377	<0.0001	7.47943	2.08876	0.7644	0.6
		18834.7	445.241	55.9039	<0.0001	12.7259	2.44153	0.7602	1.4
		34223.2	523.273	102.043	<0.0001	8.22368	2.09116	0.7669	0.82
		58952.5	628.431	175.494	<0.0001	5.73394	2.22841	0.764	0.86
		28188.4	447.339	84.0417	<0.0001	8.51789	2.07577	0.7623	0.89
		31832.3	484.535	94.7993	<0.0001	8.16327	2.05434	0.7601	0.8
		23160.6	469.338	67.7392	<0.0001	11.0108	2.31195	0.7502	1.3
		49308.4	615.077	147.385	<0.0001	6.68449	2.0353	0.7646	0.76
		61125.8	591.013	182.616	<0.0001	5.18135	1.99034	0.7637	0.82
		17915.4	443.434	53.3386	<0.0001	13.2521	2.14653	0.7558	1.6
		24481.6	466.559	73.3329	<0.0001	10.1574	2.26858	0.7588	0.95
		60727.2	410.078	183.411	<0.0001	3.59712	2.27658	0.773	0.65
		29694	468.667	89.1886	<0.0001	8.40336	2.10606	0.7613	0.9
		19384.8	450.41	57.9739	<0.0001	12.3609	2.22961	0.7523	1.2
		57815.9	555.635	174.113	<0.0001	5.10465	2.0308	0.7623	0.83
		41160.1	575.468	123.573	<0.0001	7.42942	1.98525	0.757	0.74
		17513.7	449.166	52.4716	<0.0001	13.611	2.17196	0.7513	1.3
		41665.7	611.902	125.722	<0.0001	7.78816	2.08186	0.7633	1.2
		16869.2	437.461	50.4466	<0.0001	13.7419	2.33722	0.7451	1.4
		63740.4	545.091	192.868	<0.0001	4.53104	2.01317	0.7665	0.73
		24990.3	188.293	75.6989	<0.0001	3.98883	2.28195	0.7665	1.1
		36626.5	162.155	111.675	<0.0001	2.33699	3.25322	0.7734	1.4
		26966.2	199.551	81.9532	<0.0001	3.91389	2.46515	0.7709	0.89
		38292.3	202.449	116.442	<0.0001	2.7933	1.97118	0.7702	0.9
		47597.5	189.2	144.931	0.000249084	2.0982	2.2355	0.7709	0.88
		57437.9	155.352	174.952	0.00114909	1.42653	2.01692	0.7701	0.57
		61984.1	180.133	188.934	0.00173208	1.52975	2.31747	0.7679	0.84
		16354	416.219	49.3547	<0.0001	13.4048	2.4664	0.7506	1.1
		43103.3	585.405	131.199	<0.0001	7.15308	2.36332	0.7669	0.95
		18395.4	439.732	55.7634	<0.0001	12.5786	2.61044	0.7571	1.4
		42350.8	586.346	128.907	<0.0001	7.27802	2.14573	0.7627	0.74
		17670.5	448.05	53.9169	<0.0001	13.289	2.13501	0.7617	0.93
		32872	262.111	58.7125	<0.0001	4.18235	2.09045	0	0	X
		58660.7	170.8	179.693	0.000586814	1.52788	2.018	0.7712	0.77
		9839.2	103.984	29.9663	<0.0001	5.55864	8.99061	0.7646	1.2
		6042.59	162.698	18.3993	<0.0001	14.0944	2.58789	0.7558	1.8
		5906.47	186.534	17.8973	<0.0001	16.5207	3.1977	0.7457	2.8
		8800.51	70.6654	26.9829	0.000797028	4.20168	4.15177	0.7676	1.2
		7839.86	129.228	24.0369	<0.0001	8.61326	3.05259	0.7645	2.4
		7225.64	155.723	22.1326	<0.0001	11.2575	2.26904	0.7626	1.4
		7176.71	98.362	21.972	<0.0001	7.15308	2.92329	0.7607	2.2
		6839.55	107.623	20.9671	<0.0001	8.21018	2.9311	0.7619	2.7
		12312.3	112.504	38.0146	<0.0001	4.75511	3.64033	0.7701	1.7
		32204.7	113.831	99.1701	<0.0001	1.83959	2.34517	0.7656	1.1
		14385.1	134.34	25.9222	<0.0001	4.85437	2.44332	0	0	X
		7633.52	60.5903	23.5362	<0.0001	4.12541	3.9503	0.7652	1.6
		5428.18	217.605	16.4804	<0.0001	20.7771	2.65565	0.7321	2.4
		7467.64	149.351	22.9288	<0.0001	10.4308	5.35773	0.7643	1.4
		4763.25	265.861	14.5094	<0.0001	28.777	3.86552	0.7287	2
		20170.6	343.224	62.2732	<0.0001	8.78735	2.48712	0.7558	1.2
		35300.5	319.708	110.097	<0.0001	4.66853	2.18967	0.7718	0.74
		54223.7	322.893	168.76	<0.0001	3.06654	2.09158	0.7658	0.78
		41736.2	229.363	173.857	<0.0001	2.12224	2.0536	0.7727	0.84
		42420.8	288.903	176.214	<0.0001	2.6295	2.01884	0.767	0.78
		38460.5	304.396	160.127	<0.0001	3.05157	2.08377	0.7685	1
		42869.1	184.804	179.051	<0.0001	1.66058	2.11433	0.7728	0.7
		34693.6	99.6666	145.323	<0.0001	1.10583	2.28089	0.777	0.74
		53025.3	187.512	222.015	<0.0001	1.36091	1.99665	0.7756	0.9
		43138.9	239.367	180.979	<0.0001	2.13356	2.12079	0.7779	0.82
		39924.4	237.326	167.42	<0.0001	2.27998	2.26829	0.7724	1
		27086.4	186.779	113.69	0.00855709	2.6448	2.3435	0.7739	1
		45146.5	81.9337	189.676	0.000121238	0.696379	2.11487	0.7773	0.97
		40529	164.404	170.308	<0.0001	1.55255	3.66193	0.7723	0.91
		31889.2	191.931	133.376	<0.0001	2.30574	2.19814	0.7653	1
		41866.3	153.129	176.157	<0.0001	1.39938	2.03408	0.774	0.93
		32726.4	218.565	137.213	<0.0001	2.55493	2.13816	0.7671	0.87
		32614	158.714	137.925	<0.0001	1.85014	3.79303	0.7718	1.1
		402671	214.032	1694.23	0.000286075	0.203293	2.88178	0.7732	0.49
		50156	108.215	211.335	<0.0001	0.823723	2.08771	0.7723	1
		41391.6	162.185	174.861	0.000448963	1.49298	2.15112	0.7737	0.8
		46964.3	171.377	198.914	<0.0001	1.38735	2.61708	0.7745	0.76
		18306.3	276.911	77.1599	<0.0001	5.76037	2.19322	0.7685	1.4
		15994.1	279.915	67.5141	<0.0001	6.65336	2.15943	0.7687	1.2
		17122.6	285.382	72.3274	<0.0001	6.33312	2.16289	0.7682	1.1
		17064.2	284.158	72.0383	<0.0001	6.32511	2.09303	0.7662	1.1
		17322.2	287.703	73.1593	<0.0001	6.30517	2.47808	0.7664	1.1
		17357.5	259.604	73.4333	<0.0001	5.66572	2.36269	0.7661	1.2
		20228.3	272.785	85.702	<0.0001	5.10204	2.28127	0.7661	1.4
		17305.6	284.614	73.4095	<0.0001	6.22278	2.5682	0.7686	1.2
		44763	131.274	190.732	<0.0001	1.10865	2.03777	0.7751	0.92
		67353.7	113.824	287.73	<0.0001	0.638162	2.605	0.7778	0.76
		17027.9	290.291	72.4362	<0.0001	6.43087	2.14312	0.7684	1.4
		25706.5	221.502	109.286	<0.0001	3.24886	2.37016	0.766	1.1
		30670.6	252.514	130.524	<0.0001	3.1027	2.21059	0.7672	0.85
		61588.1	129.655	264.164	<0.0001	0.792393	2.45199	0.779	0.78
		33673.3	220.525	143.387	<0.0001	2.46427	2.01865	0.7652	0.77
		31968	198.683	136.852	<0.0001	2.33645	2.11192	0.7733	1.1
		35741.9	174.819	152.71	<0.0001	1.83756	2.30542	0.7685	0.95
		18794.7	279.997	80.2747	<0.0001	5.58971	2.20953	0.7656	1.2
		17960.2	280.043	76.799	<0.0001	5.84454	2.06357	0.7662	1.3
		33865.1	186.058	145.728	<0.0001	2.05804	2.23311	0.7762	0.76
		31522.3	184.405	135.853	0.000153349	2.18675	2.11269	0.7754	0.98
		30717	185.353	132.382	0.000282748	2.25428	2.18277	0.7743	1.1
		19536.3	251.077	84.1072	<0.0001	4.80077	2.16504	0.7718	1.1
		51926.7	156.208	224.132	<0.0001	1.1217	2.25949	0.7736	1.1
		28888.8	214.476	124.608	<0.0001	2.76472	2.21047	0.77	1
5	MDRG-2-II - A top	3824.9	281.63	10.7647	0.00125905	41.7014	6.6864	0.7559	2.6
		3998.03	366.945	11.3464	0.000610344	51.9751	8.56786	0.7707	2.6
		6861.21	167.694	19.9115	0.00358871	13.7137	2.61962	0.7952	1.9
		9849.08	266.631	28.5468	0.000851207	15.2277	4.74788	0.7977	1.6
		14096.6	176.326	40.9158	0.00200078	7.02741	2.69317	0.7976	1.2
		13161.7	401.091	37.9796	0.000527873	17.2265	4.29003	0.7986	1.7
		5241.82	292.308	15.0018	0.000833467	31.3283	3.68493	0.7715	3.8
		5049.35	418.44	14.4778	0.000439757	46.5766	3.91314	0.7763	2.6
		5172.84	353.666	14.8743	0.000810538	38.5356	5.80554	0.7868	2.9
		50229.6	303.69	147.828	0.000552464	3.37724	4.04336	0.813	0.82
		3049.89	263.044	8.60773	0.000644703	49.3583	10.4695	0.7797	2.5
		17271.9	318.564	50.2162	0.00122677	10.3455	4.25133	0.7982	1.8
		4959.23	177.113	14.4088	0.00188171	20.02	3.78721	0.7959	2.1
		10859.1	341.77	31.7363	0.000684358	17.5963	3.2398	0.8018	2.4
		15271.1	263.285	44.5814	0.000990609	9.63391	3.38379	0.7985	1.8
		6492.63	421.213	18.9726	0.000429226	36.062	5.47274	0.7904	2
		3489.41	372.744	10.0051	0.0004302	59.7729	3.69015	0.7679	2
5	MDRG-2-II - G base	6302.81	252.265	17.8916	<0.0001	22.3764	2.44862	0.7476	1.4
		22734.8	154.291	65.4072	<0.0001	3.79219	2.57537	0.7717	0.87
		7509.72	245.744	21.4387	<0.0001	18.3117	3.01344	0.7597	2
		7898.49	227.605	22.4937	<0.0001	16.1134	3.40265	0.7541	1.7
		54565.2	118.36	158.66	0.000231713	1.20729	4.67872	0.7839	0.8
		23811	103.787	69.075	<0.0001	2.43013	2.06482	0.7829	0.78
		44163.7	171.835	127.967	<0.0001	2.16826	6.63014	0.7797	0.99
		25101.5	131.887	72.2207	<0.0001	2.9274	2.8677	0.7664	1.3
		17731.2	150.087	51.1486	<0.0001	4.71476	2.22733	0.7703	1.2
		46318.2	287.488	134.579	<0.0001	3.44828	5.37854	0.779	0.85
		32104.3	215.125	105.105	<0.0001	3.28084	8.75591	0.7661	1.1
		28961.1	226.763	83.5743	<0.0001	4.36681	5.7962	0.7733	1.1
		28015.8	277.853	81.0701	<0.0001	5.49149	2.26364	0.7657	1.1
		13734.6	229.264	39.6523	<0.0001	9.24214	2.27083	0.7608	1.4
		11774.1	224.82	33.2001	<0.0001	10.8202	2.28725	0.7602	1.4
		7714.32	238.959	22.2541	<0.0001	17.1438	5.74255	0.7587	2.3
		7536.66	249.695	21.6648	<0.0001	18.3284	2.67807	0.7515	1.7
		9270.98	249.27	26.6738	<0.0001	14.9098	4.73924	0.7574	1.4
		19477.2	136.122	56.606	<0.0001	3.85802	2.06213	0.7677	1.2
		6971.17	205.848	20.2767	<0.0001	16.2311	2.64821	0.7613	1.6
		7424.87	222.471	21.5101	<0.0001	16.5399	3.33639	0.7619	1.5
		20413.7	132.903	59.279	<0.0001	3.58809	2.62115	0.7632	1
		9490.38	181.028	27.4965	<0.0001	10.5097	4.41474	0.7585	1.8
		10050.7	190.565	29.2473	<0.0001	10.4178	3.69637	0.7614	1.9
		6840.42	203.878	19.8443	<0.0001	16.415	2.55462	0.76	2.5
		19754.4	134.939	49.6079	<0.0001	4.34972	2.57285	0.7614	0.98
		13903.1	223.795	40.4114	<0.0001	8.88889	6.67151	0.7685	1.5
		7506.5	210.405	21.7284	<0.0001	15.4416	4.24382	0.7565	2.4
		9205.94	192.962	26.8588	<0.0001	11.5407	5.03414	0.77	2.1
		6546.66	221.21	18.921	<0.0001	18.6081	3.72926	0.7531	1.8
		20919.3	132.364	61.3242	0.000110656	3.47947	5.01025	0.7766	1.2
		7259.34	229.034	21.1021	<0.0001	17.304	2.22344	0.756	1.8
		40264.7	84.6235	118.358	<0.0001	1.15647	5.93234	0.7829	0.77
5	MDRG-2-II - H top	2134.86	194.846	5.97662	<0.0001	50.1505	4.82506	0.6921	4.6
		7669.03	186.334	22.2047	<0.0001	13.3601	3.55027	0.7536	1.5
		9569.02	227.249	27.7085	<0.0001	13.0225	3.05224	0.7487	1.3
		5246.11	218.566	15.2193	<0.0001	22.8363	3.00871	0.7513	2.4
		10628	224.166	31.1966	<0.0001	11.4877	2.01585	0.7612	1
		22895.9	187.333	67.2311	<0.0001	4.45434	2.11871	0.7611	1.2
		15063.1	229.845	43.9965	<0.0001	8.29876	3.3518	0.7494	1.4
		5723.17	184.509	16.5875	<0.0001	17.5562	3.54203	0.7378	2.3
		29380	259.028	86.0592	<0.0001	4.78698	2.34965	0.7517	1
		2128.69	180.473	6.07321	<0.0001	46.2107	5.56197	0.7114	3.3
		12306.6	218.103	36.2222	<0.0001	9.62464	3.72137	0.7617	1.4
		17675.5	220.083	51.9407	<0.0001	6.75219	2.30039	0.7551	1.2
		33395	282.001	98.8181	<0.0001	4.58085	3.77658	0.769	1.2
		37780.5	308.973	111.833	<0.0001	4.43262	2.09399	0.7675	1.2
		2127.31	206.377	5.98957	<0.0001	52.5486	3.16754	0.677	3.1
		2515.31	209.06	7.10548	<0.0001	45.3104	10.175	0.694	3.5
		2419.6	198.305	6.93037	<0.0001	44.287	4.40656	0.7024	3.3
		2405.16	224.137	6.9063	<0.0001	50.226	4.60601	0.7024	3.2
		4388.37	219.549	12.8519	<0.0001	27.0709	11.2133	0.7451	3.2
		3725.79	213.163	10.8765	<0.0001	30.9885	14.119	0.7411	2
		22207.6	228.908	65.9617	<0.0001	5.55864	2.20981	0.7644	1.3
		2350.11	185.557	6.6891	<0.0001	42.6985	5.96309	0.6932	3.3
		6102.43	204.599	18.1221	<0.0001	17.9147	7.43308	0.7475	3.5
5	MDRG-3 - A	431.406	209.751	1.40673	<0.0001	198.255	11.0467	0.4516	12
		731.62	199.338	2.62251	<0.0001	111.995	13.2158	0.6172	7.6
		3611.83	165.685	13.1621	<0.0001	18.2382	6.28994	0.589	2.6	X
		6947.12	119.036	25.916	<0.0001	6.92042	2.93619	0.6559	1.7	X
		2150.48	61.5173	7.94213	0.000142216	11.685	7.12183	0.6575	5.4
		8348.97	94.6209	32.4115	0.000134874	4.61467	3.51586	0.7405	2.6
		5843.44	58.9044	22.822	<0.0001	4.10341	3.42093	0.7512	2.8
		5563.37	147.453	22.0121	0.000207826	10.798	4.01074	0.7765	4
		3381.9	180.606	13.5191	<0.0001	21.7155	6.49646	0.7919	5.1
		2931.22	308.105	11.1441	<0.0001	42.8266	5.88532	0.7043	4
		1231.01	328.524	4.2362	<0.0001	109.194	10.5458	0.5419	15
		5144.8	122.252	18.7557	0.000305256	9.63391	3.51032	0.6227	4.5	X
		1404.89	156.111	5.54975	<0.0001	45.6413	8.09725	0.7887	14
		3729.56	152.777	13.4494	<0.0001	16.5618	3.28823	0.5992	2.9	X
		2237.79	186.84	7.93117	<0.0001	33.8983	3.84746	0.5773	3.7	X
		1536.04	202.499	5.70453	<0.0001	53.7924	6.59791	0.6657	6.1
		2319.41	154.652	8.94344	<0.0001	27.0929	4.50074	0.7244	4.1
		563.401	158.15	2.09974	<0.0001	115.009	10.9347	0.6788	12
		4442.63	69.0197	17.3413	<0.0001	6.31313	3.49183	0.7467	2.9
		2862.44	134.782	10.4947	<0.0001	18.8041	5.38263	0.6065	4.7	X
		6618.3	136.845	25.523	<0.0001	8.40336	2.65811	0.7245	2.5
		1987.42	150.673	7.52865	<0.0001	30.8737	4.12389	0.6965	3.8
		426.682	194.493	1.4695	<0.0001	183.117	10.7141	0.5137	11
		369.477	193.143	1.28639	<0.0001	213.174	9.1477	0.5555	12
		560.452	230.762	1.92498	<0.0001	167.983	10.1745	0.5343	9.6
		688.516	254.03	2.22588	<0.0001	149.432	4.71862	0.4284	8.8	X
		2116.64	178.063	8.14639	<0.0001	34.459	15.0294	0.7356	3.4
5	MDRG-3 - B-C-D	890.843	113.591	3.43365	0.000113001	50.7614	10.6941	0.6871	9.9
		729.27	127.418	2.78287	<0.0001	72.3589	14.9531	0.7405	6.4
		1164.86	197.443	4.47571	<0.0001	68.9655	7.93539	0.7208	4.7
		503.057	154.261	1.82625	<0.0001	126.406	16.1896	0.6437	8
		750.048	230.695	2.86377	<0.0001	124.719	8.24497	0.7031	5.4
		711.28	231.933	2.65127	<0.0001	132.608	7.86872	0.6658	7.8
		1124.34	174.473	4.35907	<0.0001	63.4115	10.4442	0.7446	5.9
		868.33	245.778	3.27745	<0.0001	114.916	5.38211	0.685	6.6
		593.686	160.008	2.16546	<0.0001	111.483	17.7782	0.6578	11
		858.394	136.551	3.35046	<0.0001	65.445	18.3374	0.7693	5.1
		1021.81	73.1031	2.35514	0.000100601	29.0782	5.83014	0	3.5	X
		890.423	82.512	2.06386	<0.0001	37.4532	6.51189	0	7.1	X
		786.293	148.258	1.82454	<0.0001	76.1035	9.43591	0	10	X
		381.987	167.824	1.3738	<0.0001	181.127	18.0996	0.6277	12
		276.865	191.338	0.970274	<0.0001	282.566	9.44529	0.5704	10
		437.357	185.478	1.59824	<0.0001	177.022	13.1967	0.6767	6.7
		705.65	228.409	2.63694	<0.0001	131.527	7.21844	0.669	6.7
		425.578	147.685	1.61829	<0.0001	141.084	13.6389	0.7005	13
		530.504	122.347	2.02743	<0.0001	93.3707	16.0661	0.7024	4.7
		546.48	183.717	2.07773	<0.0001	137.988	10.1734	0.7174	6.3
		443.564	177.059	1.65106	<0.0001	162.655	9.86442	0.6669	9.6
		487.673	137.104	1.87868	<0.0001	116.36	16.3058	0.7562	8.7
		995.163	171.077	3.87567	0.000100624	70.6215	13.4507	0.7632	4.8
		618.278	234.131	2.29906	<0.0001	153.374	15.9541	0.6547	9.7
		532.296	249.066	1.9064	<0.0001	190.694	11.8671	0.6011	10
		319.296	241.397	1.09296	<0.0001	308.547	13.2789	0.5292	16
		426.679	215.792	1.57641	<0.0001	204.625	12.837	0.6417	12
		459.417	134.576	1.7601	<0.0001	120.627	21.8267	0.737	6.5
		443.888	116.459	1.62522	<0.0001	108.719	20.2112	0.6674	9.7
		346.284	96.7146	1.30481	<0.0001	115.194	16.3881	0.71	6.8
		661.338	227.889	2.39782	<0.0001	142.552	16.2733	0.6476	11
		365.977	187.248	1.27691	<0.0001	208.594	14.3301	0.5584	12
		442.791	307.344	1.5493	<0.0001	282.247	13.8079	0.559	15
		312.331	263.149	1.10598	<0.0001	341.064	16.5878	0.5711	8.1
		864.223	213.207	3.10261	<0.0001	102.743	28.8835	0.642	7
		527.63	145.127	1.98518	<0.0001	111.995	15.1562	0.6844	10
		466.846	147.956	1.81935	<0.0001	128.205	8.01815	0.7357	5.4
		337.924	238.381	1.26085	<0.0001	276.396	12.82	0.6041	8.4
		429.988	251.505	1.53339	<0.0001	239.693	14.2016	0.6032	9.6
		386.515	266.783	1.41659	<0.0001	278.707	18.0414	0.6247	11
		353.277	381.107	1.22311	<0.0001	438.212	14.7816	0.5402	5
		495.136	361.797	1.74582	0.00011411	293.686	7.5654	0.5526	4.5
		332.037	150.602	1.216	<0.0001	184.638	21.7817	0.6371	12
		273.212	70.0904	1.05516	<0.0001	102.312	3.84791	0.6939	7.9
		443.645	110.825	1.70829	<0.0001	102.02	15.8183	0.7311	12
		630.099	119.287	2.4455	<0.0001	77.101	18.8026	0.7404	6.2
		2064.1	147.283	8.33225	<0.0001	28.6697	4.61894	0.788	3.3
		728.257	104.614	2.93065	<0.0001	58.0383	17.4277	0.7928	7.2
		394.014	149.351	1.49144	<0.0001	152.975	11.1555	0.6793	9.3
		438.874	93.5162	1.70577	<0.0001	86.6551	14.9767	0.7398	5.4
		450.51	124.948	1.71881	<0.0001	111.136	13.4158	0.6808	8.9
		255.918	125.776	0.960946	<0.0001	195.963	10.5228	0.6446	9.2
		309.369	154.109	1.17685	<0.0001	197.239	6.45573	0.6548	4.7
		263.27	108.418	0.983751	<0.0001	162.734	6.06196	0.6207	6.6
		510.405	124.009	1.92321	<0.0001	98.6193	18.3233	0.6817	7.4
		550.191	116.675	2.14689	<0.0001	85.2515	18.2952	0.7266	6.9
		495.418	115.709	1.89156	<0.0001	94.6074	10.8769	0.7014	8.5
		622.189	137.231	2.3834	<0.0001	87.7963	7.46121	0.6766	5
		622.731	134.81	2.45119	<0.0001	85.6898	15.5345	0.7149	7.9
		471.545	109.807	1.8247	<0.0001	94.4287	18.3952	0.7273	7.3
		316.364	89.102	1.20089	0.000164938	111.794	9.82706	0.6554	7.3
		345.957	219.937	1.22082	<0.0001	259.067	15.2081	0.5766	5.1
		369.298	220.181	1.35882	<0.0001	241.955	14.1684	0.6397	5.8
		747.113	116.908	2.89833	<0.0001	63.1313	16.4984	0.7224	6.9
		594.852	91.6147	2.38194	<0.0001	61.7665	16.7297	0.7691	7
		647.089	107.077	2.52475	<0.0001	66.313	8.6548	0.7213	5.2
		515.135	220.399	1.94911	<0.0001	172.265	17.5301	0.6746	8.3
		338.825	163.183	1.2704	<0.0001	192.604	10.3014	0.647	7.6
		172.917	110.626	0.644458	<0.0001	252.016	14.8021	0.6112	12
		394.395	173.02	1.47889	<0.0001	175.131	14.6185	0.6442	10
5	MDRG-4 - P top	6225.64	240.214	21.2286	0.182098	18.0668	5.53838	0.7588	2.4
		7869.52	141.615	27.0447	0.00109749	8.39631	3.70562	0.7674	2.4
		9594.17	189.627	33.1028	0.002634	9.18274	2.79771	0.7661	1.7
		8308.06	152.46	28.6884	0.00107898	8.54701	3.2555	0.7725	1.8
		12828.8	168.057	44.582	0.00491933	6.06061	3.39599	0.7712	1.4
		8372.82	169.195	28.7201	0.000998356	9.40734	3.14959	0.7592	1.7
		7261.49	142.959	24.9271	0.000596659	9.1659	2.84333	0.7602	2
		8357.86	165.65	33.0881	0.0032555	8.00641	2.96774	0.7621	1.9
		7795.37	147.819	30.7768	0.00114362	7.6746	2.81536	0.7598	2
		9084.09	124.172	36.0204	0.00058124	5.54017	2.93705	0.771	1.4
		6463.4	134.557	25.3684	0.000459611	8.46024	3.04256	0.7567	1.8
		6176.81	145.193	24.1894	0.000418313	9.5511	2.89175	0.7523	2.4
		7124.37	126.126	28.1461	<0.0001	7.19424	6.0697	0.7683	2.1
		7129.57	145.154	28.0554	0.00550292	8.26446	2.57412	0.7595	1.6
		7326.9	252.543	28.7599	0.000741709	13.9353	3.27402	0.7477	2.1
		8776.15	178.122	34.3563	0.000948084	8.25764	4.41271	0.7541	2.1
		7118.67	298.893	27.926	0.000267701	17.0503	3.15356	0.7546	1.7
		7468.62	245.38	29.4987	0.00224868	13.3316	2.72488	0.7659	2.1
		5177.67	251.797	20.285	<0.0001	19.7472	3.04647	0.7522	2
		18515.4	318.037	73.3227	<0.0001	6.9735	2.08149	0.7717	1.4
		6796.33	295.299	26.4861	0.000284566	17.6585	2.84843	0.7441	1.9
		7643.61	310.462	29.7063	0.00212969	16.5017	2.82142	0.7383	1.6
		98157.7	113.829	390.743	0.0135795	0.469263	2.72032	0.7753	0.68
		100233	103.152	398.424	0.0266618	0.417537	3.10351	0.7771	0.61
		84400.5	127.057	334.602	0.0176431	0.611621	1.98477	0.7747	0.7
		98978	122.032	393.761	0.0165193	0.499251	2.80699	0.7757	0.64
		100339	113.741	398.338	0.0534453	0.459982	2.08445	0.7755	0.71
		99273.5	124.743	393.915	0.0197512	0.510204	2.5322	0.7754	0.66
		94867.7	116.492	374.776	0.0215304	0.498753	2.42815	0.7682	0.53
		96922.4	123.964	383.769	0.0128377	0.518672	2.58452	0.7692	0.71
		112717	106.602	446.777	0.00765335	0.384025	2.48952	0.7738	0.55
		81432.1	110.724	322.462	0.0221774	0.552181	2.96473	0.7721	0.81
		83042.4	127.993	329.435	0.00122888	0.625782	2.08382	0.7749	0.57
Spot size = 380 µm; depth of crater ~15µm. 206Pb/238U error is - with exception for the SRM614- the quadratic additions of the within run precision (2 SE) and the estimated external reproducibility of 2% (2 SD) based on NIST SRM-614 and WC-1 reference. 207Pb/206Pb error propagation (207Pb signal dependent) following Gerdes & Zeh (2009). Mean background for 206Pb, 207Pb and 238U was 22
a Within run background-corrected mean 206Pb signal in cps (counts per second).
b U and Pb content and Th/U ratio were calculated relative to NIST SRM-614 soda lime glass.

## Sheet: SHE and HRT Raw data
Har-Tuv quarry (HRT) and Shimshon East cave (SHE) data
Measurement	sample	206Pba	Ub	Pbb	Thb	238U d	±2s	207Pbd	±2s	Excluded
Sequence		(cps)	(ppb)	(ppb)	U	206Pb	(%)	206Pb	(%)	measurement
6	HRT-PH-2 - B	25541	1320.06	72.3088	<0.001	28.9442	4.34345	0.745989	1.11338
		9908.63	972.792	28.4952	<0.001	53.4823	5.67095	0.7243	1.98113
		14057.7	1005.41	38.9225	<0.001	40.6115	5.31605	0.730709	1.39728
		10858	1099.07	31.1293	<0.001	55.553	5.58396	0.732154	1.63439
		22612.2	1073.46	63.7666	<0.001	26.8176	4.78678	0.754694	1.1948
		16692.3	1243.8	47.9138	<0.001	40.9236	4.75774	0.735628	1.22672
		7410.77	877.522	21.092	<0.001	65.0403	6.42422	0.720493	1.69787
		16422.2	902.477	45.9163	<0.001	31.6184	5.75423	0.772685	1.21443	X
		19980.8	1054	55.26	<0.001	30.0579	5.0472	0.734975	1.19396
		14140.5	1105.97	40.9109	<0.001	42.4783	5.02928	0.729694	1.36828
		18961.4	1093.24	54.3338	<0.001	31.8776	4.61018	0.744653	1.25626
		10102.3	1076.74	29.0574	<0.001	58.3358	5.71314	0.733123	1.59991
		8036.25	750.232	23.4142	<0.001	50.2088	5.14049	0.72472	1.85372
		11576.6	899.736	33.5928	<0.001	42.1908	4.32296	0.734231	1.44875
		8364.92	768.711	24.4412	<0.001	49.2941	5.22633	0.725101	1.63126
		23520.9	1195.62	67.4435	<0.001	28.1966	4.16809	0.751816	1.20484
		9200.1	1152.79	27.2868	<0.001	65.7679	5.17009	0.712949	1.60531
		11097.2	947.965	32.6174	<0.001	45.4977	4.33248	0.722996	1.54452
		13152	437.044	37.9388	<0.001	18.3013	4.26231	0.749697	1.37863
		14876.9	747.984	41.7739	<0.001	28.9388	6.22687	0.78132	1.16972	X
		16797.9	549.472	48.3451	<0.001	18.1235	4.22701	0.75648	1.12227
		10993.1	858.227	32.1946	<0.001	41.996	4.28012	0.734394	1.662
		17131.2	547.093	49.3153	<0.001	17.6992	4.68695	0.757434	1.3661
		14833.6	649.784	43.1625	<0.001	23.848	4.75409	0.744445	1.27073
		13448.7	703.259	39.2094	<0.001	28.4128	4.52015	0.744437	1.25437
		15593.5	837.989	45.3955	<0.001	29.2865	4.99595	0.747176	1.46959
		13012.4	1039.63	38.5136	<0.001	42.6258	4.41208	0.738649	1.5644
		14265.8	619.451	42.3571	<0.001	23.0889	4.39064	0.738298	1.26655
		24576.6	1006.43	72.2607	<0.001	22.1233	4.21266	0.749404	1.05264
		25275.7	1148.31	74.1921	<0.001	24.6109	4.97653	0.751314	0.999474
		10937.2	798.168	31.5857	<0.001	39.8766	4.99003	0.737425	1.69116
		17211.3	655.015	50.7166	<0.001	20.5456	4.41554	0.752125	1.20453
		16059.3	685.213	47.5141	<0.001	22.8804	4.41073	0.747257	1.16984
		80307.4	1086.65	235.51	<0.001	7.37104	4.18445	0.759857	0.568333
		50910.3	1032.22	149.307	<0.001	11.0534	4.37265	0.761368	0.693204
		82317.1	1018.07	241.111	<0.001	6.76134	4.26833	0.764194	0.51506
		21830.6	1122.74	64.413	<0.001	27.8026	4.22432	0.757035	1.16099
		26314.1	1242.04	77.5095	<0.001	25.6091	4.41764	0.760548	1.03827
		112741	1069.55	331.393	<0.001	5.17074	4.17579	0.76514	0.614754
		107871	1049.9	317.666	<0.001	5.29257	4.14525	0.764259	0.543734
		16126.7	1230.04	48.8455	<0.001	39.5758	4.21901	0.730004	1.45615
		25775.5	1231.31	77.2625	<0.001	25.2415	4.34255	0.744135	0.920271
		10631.4	1242.03	33.3105	<0.001	58.4788	4.36755	0.726311	1.35851
		27020.4	1057.25	80.1074	<0.001	21.0982	4.30277	0.761094	1.00395
		20967.9	1215.11	63.1578	<0.001	30.4463	4.44526	0.742587	1.18726
		108618	1059.23	322.134	<0.001	5.26571	4.31918	0.764325	0.533448
		82054.9	1074.13	243.829	<0.001	7.05052	4.23253	0.763239	0.664438
		26483.8	1107.16	78.7831	<0.001	22.5003	6.1017	0.763929	1.19992
		25473.8	1113.04	76.1945	<0.001	23.2969	4.62029	0.756743	1.09437
		16114.3	1009.91	48.4931	<0.001	33.1053	4.45412	0.750756	1.45132
		36472.7	909.869	109.793	<0.001	13.1903	4.22877	0.753107	0.973181
		12996.4	1077.5	39.6996	<0.001	42.7013	5.69982	0.731981	1.55641
		26664.3	1076.13	79.5709	<0.001	21.6518	6.3009	0.763817	1.05492
		112330	939.741	336.767	<0.001	4.46373	4.21182	0.762273	0.545155
		47969.9	872.731	143.185	<0.001	9.81989	5.42574	0.775475	0.797734	X
6	HRT-PH-2 - C	31254.3	952.132	95.7925	<0.001	15.9129	4.46916	0.763812	1.09257
		38615.2	939.653	117.585	<0.001	12.8004	4.29536	0.764768	0.85023
		9259.39	953.515	29.0727	<0.001	51.2513	4.62861	0.719746	1.795
		9593.72	940.08	30.0425	<0.001	48.9972	4.84061	0.723386	1.48332
		14916.1	869.117	44.2665	<0.001	31.4332	9.31485	0.763824	1.41107	X
		21619.7	969.447	66.3244	<0.001	23.2717	4.46926	0.753645	1.23489
		41345.2	946.558	125.983	<0.001	12.064	5.93146	0.769217	0.922379
		37596.6	954.99	115.957	<0.001	13.2004	4.48315	0.765945	0.973028
		17991	1000.66	55.091	<0.001	29.009	4.9539	0.759346	1.61357
		14431.6	916.417	44.5319	<0.001	32.7259	4.8086	0.751506	1.36445
		6696.41	863.692	21.2473	<0.001	63.4755	5.17237	0.718452	1.85228
		11739.8	866.233	36.2075	<0.001	37.9525	6.84731	0.747021	1.76419
		26633.3	956.504	78.9246	<0.001	19.527	4.53101	0.77563	1.1803
		113650	799.958	349.282	<0.001	3.68794	4.19354	0.774485	0.504084
		28237.5	862.763	83.2688	<0.001	16.7181	5.85125	0.778261	1.10544	X
		19968.8	932.768	62.0251	<0.001	23.9453	4.2273	0.753802	1.17343
		8149.65	934.114	26.1689	<0.001	55.495	4.95242	0.710564	1.69683
		30257.2	1011.19	93.602	<0.001	17.2557	4.74131	0.759584	0.786988
		14357.9	917.524	44.3676	<0.001	33.0532	5.54783	0.76076	1.28983
		8665.06	1045.04	27.951	<0.001	58.2141	5.07036	0.713262	1.59423
		28640.7	988.283	89.7199	<0.001	17.6032	4.22777	0.760496	0.994951
		16788.4	1003.34	53.1094	<0.001	29.8354	4.22416	0.738851	1.29076
		16184.2	1058.85	50.9209	<0.001	32.9812	4.24601	0.746711	1.31435
		21705.6	992.162	68.0322	<0.001	23.2278	4.40856	0.754329	1.10576
		9762.27	917.692	31.0267	<0.001	46.6983	4.74184	0.738369	1.67638
		19958.1	1036.5	62.1195	<0.001	26.7223	4.63298	0.764447	1.00579
		28030.7	1005.85	87.867	<0.001	18.2732	4.18887	0.758416	1.08695
		28146.8	991.697	88.3802	<0.001	17.8957	4.15386	0.7568	0.930833
		26600.1	1080.41	84.8195	<0.001	20.3543	4.20407	0.760335	0.860214
		10096.3	1061.82	32.272	<0.001	52.0048	6.72093	0.740363	1.55237
		12922.7	989.101	41.8792	<0.001	37.1462	4.26844	0.731407	1.4403
		23512.8	997.436	74.764	<0.001	21.2794	4.44424	0.756973	0.941227
		27138.9	956.696	87.8062	<0.001	17.4536	4.36136	0.764892	1.03744
		23881.8	866.729	77.6802	<0.001	17.8322	4.79459	0.760632	0.805737
		28265.2	1013.69	90.1884	<0.001	17.934	4.28878	0.757627	0.85086
		18629.7	947.975	59.4099	<0.001	25.518	4.38213	0.761799	1.19072
6	HRT-PH-2 - E	7264.9	911.988	24.8143	<0.001	57.2542	4.37148	0.714201	1.54995
		4934.04	961.221	17.2362	<0.001	85.8068	4.3416	0.692136	2.11461
		5746.28	1104.05	20.1376	<0.001	84.1942	4.30789	0.688728	1.67725
		17907.9	1121.13	59.7241	<0.001	29.8144	4.25232	0.749185	1.15007
		9157.65	1314.87	31.5301	<0.001	64.9109	4.29918	0.712717	1.66913
		9769.41	980.548	33.0141	<0.001	47.0305	5.63094	0.743687	1.63469
		8458.74	883.052	28.9471	<0.001	47.9701	5.39809	0.731068	1.7161
		8124.54	1026.18	28.0019	<0.001	57.3756	4.5595	0.723166	1.73899
		6776.67	889.596	23.7877	<0.001	57.9755	4.36647	0.705491	2.2144
		10073.3	848.585	34.028	<0.001	39.638	4.52557	0.750585	1.5047
		9396.73	1016.02	32.1969	<0.001	49.6876	5.31482	0.733436	1.66271
		9128.48	1134.68	31.4733	<0.001	56.6573	4.67874	0.729958	2.10534
		10764.9	1149.7	37.0112	<0.001	48.9469	4.46755	0.734745	1.35162
		33782.1	1065.4	114.274	<0.001	14.9652	4.24426	0.768626	1.03944
		33935.6	1049.89	115.6	<0.001	14.5485	4.20333	0.764865	0.818986
		22225.7	1066.59	75.5617	<0.001	22.5633	4.30675	0.760946	0.871557
		8560.41	1133.87	29.9274	<0.001	59.226	4.47613	0.720391	1.78965
		8701.29	1023.02	30.4063	<0.001	52.6221	4.69849	0.72133	1.84276
		8603.8	847.98	30.1128	<0.001	44.0674	4.44411	0.722311	1.81383
		11998.7	990.811	41.2788	<0.001	38.0673	4.80062	0.746533	1.67537
		10953	1043.12	37.5007	<0.001	44.2242	5.14779	0.751068	1.64873
		6041.05	821.587	21.271	<0.001	60.2926	5.37297	0.717824	1.82744
		5814.78	892.843	20.4205	<0.001	68.0955	5.8475	0.713743	2.63168
6	HRT-PH-2 - F	9334.45	507.673	30.1794	<0.001	26.7387	4.90389	0.750648	1.91811
		30841.9	639.741	93.287	<0.001	11.146	4.57827	0.791808	1.13836
		7004.39	801.186	23.0611	<0.001	54.473	4.3906	0.725818	2.00448
		8279.09	738.168	26.8584	<0.001	43.4997	4.35734	0.742852	1.87275
		10090.9	643.196	32.3654	<0.001	31.6731	6.92963	0.755545	1.62654
		10458	482.346	33.3332	<0.001	23.1726	5.48631	0.764277	1.30892
		8547.51	508.924	29.0255	<0.001	27.8779	4.64746	0.751155	1.534
		12223.7	616.851	41.5673	<0.001	23.8911	5.14691	0.774125	1.39831
		8814.36	758.108	28.5767	<0.001	42.199	5.4529	0.751983	2.03453
		6146.58	802.923	20.6527	<0.001	60.4188	4.46191	0.709894	1.81706
		9176.76	764.783	30.0235	<0.001	40.2933	4.94141	0.741781	1.81598
		9234.61	785.68	30.3966	<0.001	40.7936	4.68136	0.737664	1.71352
		9568.76	541.349	31.1195	<0.001	27.6805	5.657	0.752597	1.76852
		7378.67	682.558	24.3547	<0.001	44.1723	4.85256	0.735251	1.80345
		8896.74	776.579	29.2926	<0.001	41.9232	4.79163	0.741245	2.0536
		6053.53	864.294	20.3204	0.00194047	66.4566	4.79212	0.719517	2.19432
		6793.75	823.399	22.9062	0.00268847	56.5633	5.85908	0.732268	1.82102
		7194.86	764.375	24.2046	<0.001	49.3663	4.79928	0.720404	1.75274
		13863.9	651.841	46.9122	<0.001	22.3651	6.37734	0.773731	1.48053
		6843.56	669.295	22.8723	<0.001	45.9961	5.61645	0.730332	1.7168
		8629.36	716.093	28.5785	<0.001	39.6524	5.80111	0.742554	1.91904
		8482.58	688.099	28.0629	<0.001	38.8773	5.03044	0.746067	1.94917
		5346.84	600.239	18.0523	<0.001	52.1091	4.6685	0.724963	2.22309
		6509.17	657.051	21.8491	<0.001	47.3588	4.48818	0.733756	2.23329
		7416.58	758.713	24.9194	<0.001	47.9317	4.22153	0.73312	1.93602
May	HRT-PH-2 - B-C	6560.86	1615.6	63.1402	<0.0001	40.4602	1.8537	0.741868	1.19685
		23037.4	1165.62	41.4543	0.00599463	44.4969	4.60781	0.743304	1.59667
		3327.99	1303.44	31.3085	<0.0001	65.2084	2.09653	0.724674	1.64473
		6187.59	1181.77	59.4605	<0.0001	31.5695	1.7787	0.750109	1.12371
		15437.3	1248.45	144.467	<0.0001	13.936	2.78789	0.777965	1.11763
		36819	1496.84	341.266	<0.0001	7.03583	1.39315	0.76816	0.594389
		10897.9	1672	92.8282	<0.0001	28.8129	1.703	0.763061	1.00085
		5917.32	1118.2	54.561	<0.0001	32.5932	2.7602	0.752328	1.61717
		6956.36	1019.9	58.1344	<0.0001	28.1328	5.41551	0.767535	1.48383
		6861.26	1092.1	57.4765	<0.0001	30.2759	4.9281	0.755848	1.5099
		3512.56	1475.15	30.9377	<0.0001	74.6783	2.59513	0.724564	1.87706
		8803.07	1358.34	83.7975	<0.0001	25.8061	4.23179	0.754244	1.42106
		4312.62	1430.6	37.0015	<0.0001	60.5107	2.6846	0.723257	1.71646
		7156.39	1252.03	62.4906	<0.0001	31.826	3.60009	0.750194	1.67178
		5825.41	1137.94	50.1888	<0.0001	36.1211	6.22917	0.755527	1.52162
		5607.15	1568.97	51.5489	<0.0001	48.0631	1.98997	0.739423	1.64064
		8048.8	1401.73	77.5565	<0.0001	28.7773	3.13086	0.75449	1.44715
		8614.83	1337.64	84.5253	<0.0001	25.3407	3.90808	0.764905	1.44116
		14273.9	1524.22	143.215	<0.0001	16.9972	1.36664	0.760051	1.0978
		6797.99	1722.21	64.9274	<0.0001	42.0833	2.44943	0.747958	1.48531
		53720	1570.97	512.327	<0.0001	4.92774	2.08229	0.771533	0.59108
		3160.24	1385.17	30.1505	<0.0001	71.6716	2.15578	0.717493	2.07768
		8923.99	1570.35	88.1384	<0.0001	28.5672	5.39469	0.767318	1.02814
May	HRT-PH-2 - E-D	7957.9	1649.05	71.8773	<0.0001	36.5784	4.87644	0.756931	1.64781
		5623.83	1149.01	51.2816	<0.0001	35.5872	3.57379	0.749979	1.97454
		6613.69	1666.39	60.8608	<0.0001	43.3102	1.82468	0.742499	1.69568
		3255.17	1138.29	30.8651	<0.0001	57.6644	1.74302	0.721556	1.16673
		4640.62	1193.8	43.8318	<0.0001	43.1162	1.67141	0.743958	1.88414
		4303.09	1145.92	40.5644	<0.0001	44.7529	3.07945	0.745267	1.94242
		6048.82	1567.5	58.0333	<0.0001	43.1101	4.26511	0.758901	1.45128
		5572.57	1563.35	46.1665	<0.0001	53.6644	7.14478	0.745885	1.7855
		4712.87	1162.43	39.9264	<0.0001	46.1542	4.63107	0.746496	1.69997
		8291.07	1200.75	75.4082	<0.0001	25.6296	6.89165	0.774428	1.41522
		7902.7	1221.92	61.8393	<0.0001	31.9282	5.5146	0.781648	1.43716
		3058.7	1314.59	29.6554	<0.0001	68.6524	2.94905	0.704443	2.6034
		4550.41	1040.69	36.7534	<0.0001	44.7998	3.23701	0.742928	1.29487
		4515.71	1137.89	39.7207	<0.0001	45.4436	2.75392	0.747703	1.7552
		4258.96	1168.34	35.9783	<0.0001	51.6064	4.48466	0.751004	2.11869
		5275.47	1248.07	44.5647	<0.0001	44.466	3.94658	0.749332	1.94544
		8406.43	1099.41	77.2807	<0.0001	23.023	6.40251	0.784538	1.12197
		13900.5	1445.17	127.034	<0.0001	18.4164	3.25589	0.785123	1.08978
		8360.21	1303.02	70.5156	<0.0001	29.6769	4.16056	0.770366	1.34541
		9473.68	1471.53	81.5332	<0.0001	29.181	1.92208	0.782799	1.05508
		5969.3	1622.55	50.4282	<0.0001	50.9899	3.31698	0.745888	1.99056
		10733.8	1252.69	80.5146	<0.0001	25.2865	6.73434	0.792471	1.06652
9	HRT-3-2 - E	1865.61	429.839	14.402	0.0017321	46.73	3.68503	0.7231	5.1
		2804.17	465.661	20.9778	0.000359431	35.01	3.80186	0.7364	3.1
		1012.22	478.298	8.36471	<0.0001	86.53	4.79563	0.6629	5.9
		1647.71	801.86	13.8113	0.000106971	87.92	3.10816	0.6642	5
		1682.75	772.387	14.6195	0.000244837	79.49	5.29857	0.6529	4
		1596.35	675.202	13.5996	0.000215905	74.91	3.34681	0.6578	3.6
		630.984	571.301	6.0139	<0.0001	137	6.12504	0.5809	4.9
		827.577	653.638	7.49633	<0.0001	128.2	4.8901	0.6132	4.6
		995.285	606.869	8.529	0.000239462	105.4	3.70392	0.6264	4
		831.129	669.622	7.53482	<0.0001	130.1	3.96556	0.6059	4.2
		955.147	549.919	7.30827	<0.0001	113.7	4.92877	0.6608	5
		1703.36	722.958	14.2101	0.000173178	77.97	3.38321	0.6851	3.7
		1605.81	644.247	13.6063	0.000407221	72.12	2.60031	0.6743	3.7
		1473.44	527.675	12.4397	0.000426291	64.46	4.15198	0.6702	4.7
		1673.15	480.07	14.3852	0.000187834	51.34	2.88556	0.6919	3.9
		1237.43	511.748	10.8252	0.000210228	72.62	4.92111	0.6892	5
		1796.42	815.948	15.1746	0.000835907	82.02	3.29549	0.6769	4.9
		1829.15	586.407	15.1597	<0.0001	58.97	3.08515	0.6759	3
		1680.03	795.924	14.9259	0.000304028	79.73	4.19574	0.6422	4.4
		1441.79	623.81	12.4479	0.000361346	76.39	3.17141	0.6757	5.5
8	HRT-3-3 - A	444.681	407.824	2.76507	<0.0001	202	5.21904	0.4979	12
		704.7	410.672	4.0566	<0.0001	147	9.89641	0.5931	7.2
		192.578	389.019	1.56063	<0.0001	304.6	5.75164	0.3277	15
		13724.5	419.241	61.0586	<0.0001	11.16	17.1758	0.7917	1.3
		253819	225.957	1206.38	0.00224624	0.3054	3.43834	0.7976	0.63
		680.035	431.498	4.1137	<0.0001	148.3	6.66392	0.5488	10
		396.3	376.318	2.52721	<0.0001	201.5	6.5688	0.4788	13
		801.766	383.293	4.69841	<0.0001	119.5	9.37553	0.6077	7.9
		1834.42	446.276	9.68364	<0.0001	70.84	2.79172	0.6905	3.9
		17741.3	374.054	87.86	<0.0001	6.835	2.19404	0.7689	1	X
		365.621	301.616	2.40348	<0.0001	169.8	6.96988	0.4786	14
		14719.6	409.133	74.4612	<0.0001	8.835	2.66193	0.7719	1.5	X
		1386.7	527.961	8.0574	<0.0001	96.4	6.24095	0.6145	5.9	X
		13269	487.694	65.7536	<0.0001	11.91	3.46961	0.7691	1.3	X
		19306.6	408.856	98.2828	<0.0001	6.662	2.14664	0.7643	1.2	X
		19617	472.111	105.888	<0.0001	7.147	2.9927	0.7662	1.1	X
		971.961	443.473	5.91435	<0.0001	108.7	4.30662	0.5899	7.4
		1210.54	380.121	5.47713	<0.0001	103.6	10.1981	0.6389	4.2
		1114.38	394.903	5.91421	<0.0001	99.9	25.9237	0.6432	6.3
		1150.25	413.859	6.44405	<0.0001	95.94	3.2054	0.6405	4.2
		1399.26	486.071	7.44444	<0.0001	99.46	7.22145	0.6745	3.5
		1173.01	547.718	5.88286	<0.0001	135.4	7.21434	0.5951	5.6
		2294.58	426.089	10.6729	<0.0001	62.41	8.69257	0.7205	2.8
		4897.14	335.766	25.6503	0.000244971	21.03	3.04314	0.7699	1.6	X
		1332.87	445.879	7.42924	<0.0001	90.76	8.84044	0.6618	4.3
		27508.1	456.889	141.126	<0.0001	5.282	3.69262	0.7989	1.2	X
		12262.1	327.855	63.7078	<0.0001	8.296	2.94896	0.7766	1.3	X
8	HRT-3-3 - B(I)	3488.87	305.137	5.77669	0.000482107	79.86	9.27573	0.6614	5.5
		1530.77	220.453	5.98473	<0.0001	56.4	8.87946	0.6836	6.1
		1026.48	292.834	4.44782	<0.0001	96.27	7.0859	0.6043	5.7
		732.38	299.437	3.71789	<0.0001	115.2	2.50374	0.5674	3.4
		63251.1	43.3708	273.193	0.0064851	0.2549	2.44741	0.7689	0.63
		1796.53	378.168	8.6527	<0.0001	65.25	2.95867	0.6396	4.1
		3344.49	309.09	14.8086	<0.0001	32.84	4.02573	0.732	3.4
		2512.4	186.3	11.2013	<0.0001	26.23	2.3489	0.7366	3.6
		1083.38	202.095	5.04612	<0.0001	61.08	4.01285	0.6765	4.6
		2275.51	242.084	10.3793	<0.0001	36.17	11.2476	0.7062	4.1
		1595.5	276.55	7.61444	<0.0001	55.8	7.99857	0.6896	5
		2133.82	183.36	9.85306	<0.0001	28.82	2.79493	0.7037	3.2
		57520.1	200.913	251.606	0.0154125	1.284	2.71841	0.7712	0.82
		42903.1	181.127	190.96	0.0130724	1.518	3.15118	0.7629	1.1
		2173.65	174.898	10.1104	<0.0001	26.69	4.64839	0.6968	4.2
		2500.02	299.994	11.2244	<0.0001	41.55	4.63733	0.7105	3.4
		1252.71	305.703	6.10932	<0.0001	74.89	3.89504	0.6437	3.6
		1821.91	170.428	8.40155	0.000115471	31.67	4.61186	0.7183	3.9
		1463.45	325.2	7.03297	<0.0001	69.6	4.95852	0.6537	5.4
		1712.96	250.277	7.52949	0.000140776	51.13	5.04562	0.6915	4.5
		6817.58	199.118	40.6931	<0.0001	7.857	6.98298	0.7692	1.8
		1520.99	386.192	7.31446	<0.0001	80.49	3.62657	0.6758	4.7
		1730.11	560.265	8.8866	<0.0001	93.55	3.13891	0.6291	3.7
		1151.11	482.873	5.92959	<0.0001	118.9	3.43031	0.6019	3.1
		1782.36	362.493	8.65161	<0.0001	64.16	4.06436	0.6837	5.7
		2316.7	187.44	10.8501	0.00014336	27.14	3.16708	0.7295	2.6
		1387.35	261.761	6.99445	<0.0001	55.98	3.59748	0.6428	4.8
		1088.68	316.791	5.48401	0.000125868	86.26	5.62113	0.6399	5
		798.634	336.359	4.05316	<0.0001	119.2	14.7883	0.5743	8.8
		2805.81	411.281	13.3988	<0.0001	47.93	3.19162	0.7186	3.8
		934.811	341.016	4.54013	<0.0001	111.5	6.82965	0.6298	5.9
		1711.27	365.927	8.48894	<0.0001	65.3	5.85065	0.6647	3.9
		3540.19	408.554	13.8581	<0.0001	45.89	5.41019	0.7127	4.5
		1170.48	491.77	6.32879	<0.0001	112.8	10.4791	0.5924	6
		1684.86	524.51	8.55063	<0.0001	91.48	3.97407	0.6377	4.6
		1697.43	220.459	8.3456	<0.0001	40.74	7.00844	0.6964	4.9
		2737.76	219.37	13.0275	<0.0001	26.37	3.60544	0.7238	2.6
		1546.25	311.801	7.76	<0.0001	60.62	4.89494	0.6578	4.4
		2565.99	354.692	12.1274	<0.0001	45.87	2.93974	0.7262	3.9
		1363.62	397.087	7.00467	<0.0001	84.4	3.80057	0.6348	5.1
		2477.02	135.302	11.5142	<0.0001	18.46	4.78545	0.7295	3.2
		1156.75	578.353	6.40889	<0.0001	129.3	4.61827	0.5708	4.7
		1551.96	495.039	8.12816	<0.0001	91.06	3.43743	0.642	4.1
		6324.46	357.563	12.5088	<0.0001	43.77	3.82808	0.6835	3.1
		2234.05	292.294	11.3117	<0.0001	39.48	3.87812	0.6795	3.3
		998.678	382.866	5.27227	<0.0001	107.1	4.07401	0.6187	6.5
		1866.2	87.621	9.26544	<0.0001	14.66	4.59117	0.7055	5.8
		1033.06	422.387	5.5467	<0.0001	111.1	3.26616	0.6011	4.9
		1582.25	386.622	7.94406	<0.0001	75.16	3.36228	0.6986	5.4
		1694.28	588.543	8.96468	<0.0001	98.03	3.75751	0.6399	5.5
		440.348	414.573	2.793	<0.0001	199.1	5.98997	0.4656	9.7
		470.9	503.89	2.94708	<0.0001	226.2	4.13253	0.4442	7.6
		13999.3	488.211	68.9055	<0.0001	11.21	2.3422	0.7418	1.3
		8613.58	604.576	49.0503	<0.0001	19.58	6.2058	0.75	1.8
		4794.17	597.192	24.0752	<0.0001	38.63	2.93881	0.7135	2.2
		1207.72	348.521	6.61711	<0.0001	77.47	4.65266	0.6142	5.3
		4013.93	288.495	19.8839	<0.0001	22.68	3.24223	0.7201	2.3
		533.735	445.379	3.44516	<0.0001	177.4	4.33575	0.5011	9.7
		1939.98	589.427	10.6692	<0.0001	82.19	3.81063	0.6335	3.8
		1038.02	418.445	5.82925	<0.0001	103.6	4.47966	0.5824	10
		2828.43	422.835	13.4265	<0.0001	48.63	4.83239	0.6985	4.3
		2263.97	412.91	11.9183	<0.0001	52.91	4.0939	0.679	3.9
		2324.65	656.408	12.3029	<0.0001	81.03	3.55361	0.6692	3.8
		822.737	527.094	4.92511	<0.0001	149.5	7.93832	0.5296	6.7
		1249.58	619.168	6.74001	<0.0001	134.3	5.02454	0.604	7.8
		813.515	589.236	4.89383	<0.0001	168	5.70688	0.527	8
		3019.18	520.489	15.9556	<0.0001	49.85	4.78647	0.68	4
7	SHE-G - C	11425.3	650.726	46.1813	<0.001	22.44	2.44374	0.7539	1.6
		17514.3	689.109	70.9091	<0.001	15.48	2.34805	0.7543	1.1
		6564.52	709.398	27.4254	<0.001	40.55	2.47444	0.7256	1.5
		7776.17	658.037	32.1246	<0.001	32.4	2.4826	0.7415	1.3
		13636.7	658.121	55.8063	<0.001	18.7	2.28693	0.7462	1.1
		10665.9	666.206	43.2801	<0.001	24.41	2.57286	0.7462	1.5
		19851	691.489	80.5929	<0.001	13.68	2.44012	0.756	1.1
		6368.3	685.201	27.0577	<0.001	39.44	2.49701	0.7136	1.9
		16865.4	586.39	68.6599	<0.001	13.56	2.33548	0.7481	1.3
		17569.9	547.996	71.2701	<0.001	12.23	2.30651	0.752	0.95
		15062.6	706.745	62.2494	<0.001	18.01	2.34274	0.7471	1.3
		10754.3	710.801	45.0221	<0.001	24.87	2.57591	0.7345	1.7
		16757.6	670.743	69.2872	<0.001	15.37	2.40525	0.749	1.1
		8167.78	713.062	34.3626	<0.001	32.38	2.47183	0.7174	1.7
		11529.9	606.525	48.1344	<0.001	19.94	2.51232	0.7426	1.5
		7699	693.625	32.4582	<0.001	33.53	2.45862	0.7269	1.6
		8164.56	756.199	34.3055	<0.001	34.67	2.50264	0.7315	1.4
		8131.26	752.203	34.0421	<0.001	34.83	2.33043	0.7353	1.8
		23795.9	634.15	97.9896	<0.001	10.33	2.21338	0.7586	0.88
		18153.6	629.976	76.1263	<0.001	13.09	2.40848	0.7415	1.2
		6195.32	579.196	25.6653	<0.001	35.6	2.85882	0.737	1.6
		8902.06	747.744	37.337	<0.001	31.64	2.58955	0.7396	1.7
		5465.99	691.187	23.6775	<0.001	45.24	2.70271	0.7048	1.3
		7513.74	684.594	32.576	<0.001	32.61	2.68051	0.707	2
		7615.49	738.863	33.0079	<0.001	34.91	2.25596	0.7164	1.9
		7437.22	734.313	31.9995	<0.001	35.73	2.62671	0.7131	1.8
		16767.2	655.694	69.7285	<0.001	14.97	2.26071	0.753	1
		8192.66	723.11	34.7262	<0.001	32.65	2.99635	0.7259	1.9
		6259.73	698.291	26.8613	<0.001	40.56	2.88961	0.7172	1.6
		7005.44	704.191	30.2568	<0.001	36.8	3.47697	0.7409	1.7
		5978.02	711.678	26.3589	<0.001	41.97	2.59249	0.7102	2.1
		14559.8	644.082	61.9823	<0.001	16.52	2.32652	0.7508	1.3
		25633.6	642.191	108.699	0.00135319	9.426	2.36096	0.7575	1.2
		20700.4	580.528	88.7088	0.00134191	10.38	2.48898	0.7474	0.89
		16087.8	635.488	68.5658	<0.001	14.78	2.3095	0.7561	1.2
		6165.22	690.989	27.1747	<0.001	39.74	2.82573	0.7199	1.7
		5768.11	722.197	25.9601	<0.001	43.17	2.44985	0.7074	1.9
		7531.69	668.506	33.114	<0.001	31.74	2.4987	0.731	2
		5592.42	713.569	25.1947	<0.001	43.85	2.53734	0.7033	1.6
		13249.5	669.588	57.2719	<0.001	18.48	2.55127	0.7404	1.2
6	SHE-B - E top	9912.11	727.351	47.0061	<0.001	24.5806	4.34161	0.749537	1.88291
		10112.1	753.853	47.6573	<0.001	25.2595	4.68865	0.75909	1.93797
		11299.4	777.875	53.8665	<0.001	22.8944	4.43055	0.745905	1.65747
		11566.3	734.778	55.0777	<0.001	21.1903	4.31706	0.749344	1.47653
		14838.3	265.917	71.0499	<0.001	6.00852	4.187	0.768916	1.04996
		11179.9	776.007	53.4986	<0.001	23.1963	4.44238	0.761745	1.47538
		12827.7	771.633	62.0216	<0.001	19.7798	4.38534	0.751021	1.49351
		10056.9	688.477	49.2725	<0.001	22.0524	4.61482	0.73766	2.10432
		10705.9	731.132	51.9117	<0.001	22.4203	4.28514	0.753365	1.58874
		11187.3	889.435	54.6634	<0.001	25.7664	4.31244	0.743795	1.80295
		9166	722.997	44.269	<0.001	26.1224	4.58445	0.762093	2.19954
		4621.51	678.453	22.876	<0.001	46.59	5.59992	0.729249	2.59069
		4892.6	638.655	24.5724	<0.001	40.7752	4.57925	0.726859	2.78203
		5606.9	646.162	27.6694	<0.001	36.9347	4.48759	0.741519	2.48387
		9361.13	716.83	46.0979	<0.001	24.6397	4.3737	0.744904	1.75738
		3083.26	728.778	15.7351	<0.001	71.9608	6.73379	0.709462	5.05466
		4753.07	654.734	23.8774	<0.001	43.0034	4.67252	0.726223	2.3645
		6869.85	506.529	34.1578	<0.001	23.4285	4.4738	0.739582	1.76996
		5615.33	541.8	27.9214	<0.001	30.7451	4.95459	0.744797	2.40696
		6827.37	790.393	34.33	<0.001	36.2397	4.55055	0.732841	2.53901
		9130.58	892.076	45.9167	<0.001	30.5834	4.42154	0.733003	1.60073
		7633.68	877.492	38.2525	<0.001	36.2658	4.54024	0.74077	1.98
		8310.96	898.336	41.5572	<0.001	34.2428	4.70875	0.744388	1.79944
		2165.31	676.255	11.4138	<0.001	90.7348	8.72847	0.683819	4.20559
		3372.91	564.462	17.4592	<0.001	50.19	8.49718	0.707961	2.7626
		1736.01	805.528	9.54742	<0.001	125.506	5.98909	0.633362	5.28721
		1885.2	667.362	10.262	<0.001	97.2647	6.55779	0.642669	3.76798
		1822.67	591.967	8.92801	<0.001	100.854	5.52962	0.671913	3.9187
		3586.33	616.825	18.1188	<0.001	53.775	6.40135	0.739237	3.29309
		2099.57	767.903	11.2576	<0.001	104.276	5.63635	0.680687	4.28432
		2744.98	807.474	14.4001	<0.001	87.0192	5.25342	0.707334	3.51533
		5938.86	547.496	30.1025	<0.001	28.9299	4.79315	0.751916	2.78746
		6483.97	735.852	33.3384	<0.001	34.7721	4.71166	0.734377	2.34483
		3968.64	605.805	20.7426	<0.001	45.4791	5.17258	0.713468	2.02125
		2701.79	630.687	14.1938	<0.001	69.2116	5.04421	0.713961	2.76632
		5898.33	693.533	30.536	<0.001	35.8463	4.53953	0.73774	2.34422
		8428.04	877.93	41.8205	<0.001	32.8595	4.4539	0.722758	1.33215
		12883.5	869.801	65.8931	<0.001	21.0031	4.25181	0.752491	1.16406
		7889.45	828.701	41.59	<0.001	31.2745	4.40536	0.727701	1.48628
		6183.83	828.801	32.4626	<0.001	40.0087	4.69673	0.724816	1.9379
		5458.92	934.055	28.618	<0.001	51.2449	5.29423	0.72827	2.31966
		3905.3	693.542	20.6263	<0.001	52.6839	4.77049	0.724568	3.02634
		4880.12	670.655	25.4139	<0.001	41.7415	4.58382	0.741719	2.13822
		3848.52	463.457	19.8292	<0.001	37.1494	6.53452	0.750566	2.89864
		2229.93	677.619	12.0882	<0.001	86.6857	5.74868	0.701061	3.90276
		1285.23	658.635	6.04766	<0.001	160.899	7.53874	0.621681	4.1193
		1023.6	671.531	6.08325	<0.001	161.125	6.2145	0.601215	6.39843
		971.606	652.835	5.79144	<0.001	164.594	5.65949	0.601852	4.51555
		1341.24	686.292	6.95512	<0.001	144.986	6.10389	0.612418	7.61396
		2527.93	863.631	14.1694	<0.001	93.0023	6.48902	0.677436	5.44114
		6866.09	674.328	36.6255	<0.001	28.9441	4.38491	0.730578	1.73617
		7359.32	565.538	38.8601	<0.001	23.0639	4.41663	0.745217	1.69647
		5900.36	627.198	31.1246	<0.001	31.9831	4.43222	0.747929	1.93845
		3222.45	779.339	17.8959	<0.001	66.9804	5.82272	0.69147	4.30311
6	SHE-B - E base	4912.14	959.456	26.6443	<0.001	56.0611	7.89176	0.713044	2.10754
		3210.59	958.468	17.714	<0.001	83.7049	4.93831	0.70174	3.2867
		2914.47	924.23	16.4781	<0.001	85.5008	5.73641	0.675744	2.94724
		2794.06	824.636	15.4337	<0.001	82.6828	6.0767	0.702286	3.16483
		10744.3	852.594	56.5605	<0.001	24.1921	4.93924	0.76832	1.57864
		6692.7	675.856	39.944	<0.001	27.0607	6.50654	0.761918	1.62782
		2216.32	841.994	12.7137	<0.001	100.348	5.82552	0.665172	3.94064
		2258.66	899.777	13.0017	<0.001	104.624	6.11365	0.661254	3.58656
		2622.96	915.141	14.9456	<0.001	93.6468	4.91243	0.681489	3.43378
		2137.28	854.713	12.1593	<0.001	107.365	4.64777	0.679188	4.30519
		2195.22	798.533	12.7304	<0.001	95.1454	6.03703	0.667043	3.17491
		2414.22	839.18	13.662	<0.001	94.9704	5.00417	0.700748	4.83545
		3206.59	1154.6	18.6031	<0.001	95.2213	5.81251	0.687049	4.58414
		2918.65	1203.54	16.9474	<0.001	108.588	5.34822	0.681106	3.84099
		2464.46	1180.62	14.5424	<0.001	123.206	5.61954	0.667938	3.69096
		2704.8	1153.57	16.0178	<0.001	109.069	5.80266	0.664322	3.01524
		2739.07	1208.95	16.1863	<0.001	113.347	5.64371	0.667905	3.04884
		2892.97	1177.19	17.2087	<0.001	104.111	5.08656	0.672915	4.09511
		2990.35	1064.34	17.6888	<0.001	91.7416	5.70596	0.676098	3.99304
		5781.69	1234.99	32.8959	<0.001	58.7508	4.36386	0.722345	2.61456
		2840.46	1062.09	16.8326	<0.001	95.9473	5.66903	0.671407	4.15674
		3199.99	886.451	18.704	<0.001	72.9767	6.43918	0.693464	4.45358
		4071.32	1114.06	24.1047	<0.001	70.8285	5.58726	0.685064	3.40376
		2956.37	1082.36	17.2008	<0.001	96.4994	7.17285	0.686288	4.96321
7	SHE-A-A` - A` most inner	2221.75	182.32	9.33726	<0.001	31.58	8.76221	0.7828	3.4
		2288.1	187.359	9.33184	<0.001	32.4	8.24765	0.7784	2.3
		1978.33	220.669	8.48695	<0.001	41.7	11.6776	0.7669	3.6
		1164.34	201.151	5.19842	<0.001	61.09	12.5376	0.7383	3.3
		2730.54	204.671	12.0378	<0.001	27.43	10.4239	0.7778	2.8
		4715.85	261.472	18.0553	<0.001	23.54	8.76576	0.7919	1.7
		2131.67	193.037	9.27694	<0.001	33.38	7.59406	0.7673	3.6
		2553.39	172.704	10.9293	0.00104701	25.47	9.72394	0.7767	3.2
		17815.6	72.0627	52.2124	0.188276	2.259	3.46106	0.8053	1.1
		22061.7	165.587	86.6012	0.0112508	3.133	3.24584	0.8068	0.98
		20327.9	178.944	82.6996	0.00101972	3.587	4.40722	0.8293	0.93
		27762.4	125.585	116.305	0.00777094	1.771	2.41588	0.8086	1.1
		4604.31	272.442	18.9123	<0.001	23.53	8.26672	0.8011	1.7
		3163.84	297.602	7.39081	<0.001	62.88	8.56895	0.7187	2.8
		2612.76	289.51	11.3154	<0.001	41.04	9.77109	0.7675	1.9
		2805.94	277.246	12.0755	<0.001	37.02	8.12817	0.7768	2.3
		2415.29	169.136	10.3338	<0.001	26.63	8.98898	0.7938	3.4
7	SHE-A-A` - A` inner	1743.69	277.611	7.60982	<0.001	57.82	7.07221	0.7452	2.4
		4205.64	362.839	17.8817	<0.001	33.06	5.1819	0.7966	2
		3207.56	357.036	13.6645	<0.001	41.9	6.22333	0.767	2.4
		2104	374.015	9.18196	<0.001	64.88	8.79751	0.7545	2.9
		824.811	325.715	3.94919	<0.001	126.1	4.45504	0.6803	5.9
		1082.07	332.594	5.16691	<0.001	97.6	4.76633	0.6663	4.8
		3002.85	321.202	12.713	<0.001	40.86	7.00824	0.7825	2.2
		2644.15	323.439	11.2248	<0.001	47.05	5.93949	0.8005	3.2
		1892.37	443.892	8.58543	<0.001	80.79	5.32232	0.7196	3
		1681.98	333.923	7.62681	<0.001	68.76	7.42766	0.7288	4.4
		5896.18	196.024	24.2918	<0.001	13.28	11.0312	0.8147	1.9
		12592	211.824	53.606	<0.001	6.555	5.11578	0.8305	1.4
		3276.95	200.389	14.009	<0.001	23.54	9.30042	0.815	2.5
		1269.54	329.181	5.89602	<0.001	86.11	3.46306	0.6963	3.9
		629.108	348.647	3.31101	<0.001	155.2	7.62433	0.618	6.6
		4022.44	344.364	16.925	<0.001	33.02	7.43168	0.7889	2.4
		2996.93	435.267	13.1198	<0.001	53.57	7.51053	0.7797	2.2
		2813.17	371.044	12.3861	<0.001	48.13	13.2833	0.7702	2.8
		3027.85	405.883	13.8506	<0.001	46.58	2.94962	0.7505	2.6
		2312.52	312.867	10.2551	<0.001	48.74	11.8229	0.7599	3.4
		372.559	280.016	2.09604	<0.001	189.8	7.54024	0.5563	4.9
		791.895	278.552	3.71293	<0.001	114	9.58419	0.6709	5.1
		404.679	285.101	2.1479	<0.001	190.5	6.8475	0.573	6
		929.81	321.222	4.59294	<0.001	106.7	7.84656	0.6778	4.7
		745.887	339.412	3.78881	<0.001	133.1	4.09785	0.6308	4.2
		1745.47	468.469	8.13414	<0.001	89.75	9.7523	0.7148	3.8
		1690.04	466.051	8.11823	<0.001	88.53	8.94277	0.6962	3.3
		1324.69	370.655	6.49712	<0.001	87.53	9.36245	0.6872	4.6
		2338.64	428.224	10.4088	<0.001	65.15	9.47493	0.7438	3.6
		2043.72	446.111	9.37381	<0.001	74.41	8.86161	0.7207	2.7
		331.876	323.034	1.92517	<0.001	232.1	5.02094	0.5136	8.4
		1744.03	378.075	8.19564	<0.001	72.31	8.28072	0.7253	3.3
		688.182	455.584	3.64693	<0.001	181.4	7.48482	0.5928	5.2
		1591.38	329.102	6.92598	<0.001	75.63	11.1608	0.7531	3.3
		3957.39	409.424	17.4394	<0.001	38.29	6.85313	0.7985	1.9
		1757.25	326.452	2.85998	<0.001	164.4	10.3527	0.5788	11
		4815.49	501.339	22.3107	<0.001	36.3	7.98765	0.7807	1.8
		5356.53	368.286	2.638	<0.001	203.3	10.5596	0.5973	5.9
		2825.88	508.825	13.4226	<0.001	60.63	4.87508	0.762	3.1
		709.733	387.282	3.89343	<0.001	144.4	10.742	0.5922	4.5
		1911.62	431.844	9.26803	<0.001	73.51	7.10544	0.737	3.2
		4147.9	471.028	19.5206	<0.001	39.06	3.23248	0.7842	2.5
		4886.18	421.545	23.3937	<0.001	29.48	3.72058	0.804	2
		3453.03	430.253	15.9378	<0.001	43.65	11.0196	0.7823	2.7
		1711.29	371.169	8.464	<0.001	68.56	10.554	0.7206	3.6
		4992.09	348.852	23.1872	<0.001	24.75	6.59338	0.8145	2.2
		3554.73	364.499	15.5932	<0.001	37.95	13.8948	0.7896	3
7	SHE-A-A` - A`	7864.84	362.848	13.2747	<0.001	43.56	5.66214	0.7555	1.8
		3178.69	369.815	15.4527	<0.001	37.87	4.25437	0.7422	3.1
		2729.48	363.991	13.3887	<0.001	43.12	4.71431	0.7468	2.3
		1245.41	407.952	6.67	<0.001	92.56	3.29562	0.6631	3.3
		2382.21	413.636	11.7316	<0.001	55.95	5.18425	0.7474	2.8
		1570.92	443.695	8.08577	<0.001	85.19	3.53593	0.7081	3.4
		1555.01	411.801	7.60454	<0.001	84.18	6.48218	0.7103	2.3
		2832.81	430.005	13.7274	<0.001	49.94	4.64126	0.7562	2.7
		823.192	397.918	4.26235	<0.001	137.9	8.41042	0.6208	4.8
		501.383	393.864	3.0127	<0.001	187.6	6.39856	0.5728	6
		2016.44	384.796	10.79	<0.001	56.79	7.48598	0.754	3
		2607.32	364.844	13.0845	<0.001	44.98	6.17844	0.778	3.3
		2955.83	357.311	14.6769	<0.001	38.91	5.85427	0.7608	2.5
		1525.39	376.899	7.8071	<0.001	75.17	4.73524	0.7133	2.8
		1184.58	412.729	6.44438	<0.001	96.82	4.65076	0.6612	3
		2018.63	394.794	10.5843	<0.001	58.71	5.84062	0.7329	2.7
		3280.66	362.404	15.6003	<0.001	37.19	8.04827	0.7637	2.6
		2739.68	378.479	14.1267	<0.001	42.97	4.67218	0.7673	3.4
		3820.17	329.544	19.1951	<0.001	27.81	6.03385	0.7857	3.2
		3319.97	459.468	16.9433	<0.001	43.48	7.15877	0.7666	2.3
		2421.62	374.124	12.6128	<0.001	46.64	11.7711	0.731	3.2
		1172.83	483.959	6.64262	<0.001	109.4	3.78511	0.6488	3.6
		2819.36	392.778	14.5461	<0.001	43.51	3.12861	0.7759	2.6
		2483.7	420.198	13.0806	<0.001	50.72	6.13394	0.7385	3.9
		4482.47	363.206	22.3284	<0.001	26.24	8.73881	0.7777	2
		2647.19	419.746	14.103	<0.001	47.22	8.41324	0.7472	3.1
7	SHE-B` - C	3664.19	728.461	13.7895	<0.001	80.38	3.35341	0.6725	2.3	X
		8763.4	675.705	31.0038	<0.001	34.8	7.08594	0.759	1.6	X
		4609.33	365.157	16.8086	<0.001	34.71	10.3215	0.7599	2.4	X
		5860.94	725.159	21.955	<0.001	51.76	2.52144	0.7249	1.2	X
		8477.92	810.295	28.6874	<0.001	45.35	5.97766	0.769	1.8	X
		3694.36	764.55	13.4519	<0.001	86.42	4.83492	0.6712	2.4
		2936.86	808.664	11.8489	<0.001	102.4	5.62535	0.6488	2.5
		4141.79	758.261	15.7912	0.00214177	73.65	3.5417	0.6865	2.5	X
		4348.05	776.659	16.6255	<0.001	72.33	7.87732	0.7032	2.2
		6457.3	782.298	23.8929	<0.001	52.28	4.23218	0.7589	2.4
		3589	774.789	13.7668	<0.001	86.49	5.5873	0.6901	1.7
		2102	732.354	8.73533	<0.001	124.6	5.75874	0.6314	2.8
		2431.14	791.152	9.90842	<0.001	119.5	8.08543	0.6436	2.4
		1971.02	787.903	8.28371	<0.001	139.7	4.12274	0.6114	3.5
		6332.63	816.081	23.1651	<0.001	55.9	8.20522	0.7476	2.2
		3674.36	773.044	14.1592	<0.001	84.9	4.52599	0.711	2.4
		4144.76	768.489	13.8564	<0.001	86.37	5.74561	0.7135	2.7
		6718.86	805.118	25.0763	<0.001	51.38	3.20658	0.7632	1.6
		6795.87	878.851	25.3484	<0.001	55.21	2.65375	0.754	1.7
		6510.1	677.936	23.7402	<0.001	45.59	3.11819	0.7587	1.7
		5449.25	660.471	20.2119	<0.001	51.93	4.49141	0.7503	2.5
		6103.46	730.362	22.7765	<0.001	51.06	4.60342	0.7539	2
		8216.23	750.481	22.5213	0.00232017	52.84	6.54763	0.7464	2.2
		3817.67	794.813	15.1683	<0.001	80.58	4.91581	0.6913	2.5
		3353.66	782.289	13.5182	0.00188641	88.64	5.39374	0.6841	2.9
		5183.4	821.147	19.8358	<0.001	64.98	4.53998	0.7277	1.8
		7294.18	785.215	27.9071	<0.001	44.81	2.83006	0.7542	1.8
		8694.36	834.755	33.2127	<0.001	40.56	4.83439	0.7787	1.5
		10326.9	747.237	37.4191	<0.001	32.35	7.23619	0.7856	1.4
		4076.18	756.986	16.22	<0.001	72.5	7.477	0.7092	2.7
		5873.54	808.144	22.3519	<0.001	57.35	5.86019	0.7467	1.9	X
		5826.25	761.332	21.7275	<0.001	56.09	7.14662	0.7636	2
		4263.19	799.209	16.8211	<0.001	74.11	8.61539	0.7164	3
		4343.38	777.553	17.1046	<0.001	71.46	7.745	0.7305	1.8
7	SHE-B` - C-D	5240.33	746.537	20.9061	<0.001	56.05	4.2763	0.7279	1.5
		5188	764.913	18.4161	<0.001	64.49	5.72763	0.7083	2
		4769.05	763.358	19.337	<0.001	61.21	3.90478	0.7057	2
		6315.66	759.265	23.9169	<0.001	49.9	4.73271	0.7304	1.5
		5308.56	771.262	20.9376	<0.001	57.63	3.84477	0.7218	1.8
		4042.62	760.746	16.6118	<0.001	70.77	2.98959	0.6998	2
		3532.64	790.399	14.5061	<0.001	83.37	2.89397	0.6824	2.4
		4169.39	798.27	16.3296	<0.001	74.85	4.7203	0.6835	2.8
		4199.53	798.661	16.532	<0.001	74.15	3.84275	0.6878	2.3
		4489.77	815.467	16.9337	<0.001	74.68	5.37657	0.706	2.4
		8869.43	784.713	33.2763	0.00267288	37.83	6.48333	0.7675	1.5
		7949.32	815.828	30.7743	<0.001	42.36	5.31861	0.7601	1.8
		4370.22	812.849	17.9258	<0.001	69.85	4.13769	0.6941	2.6
		4413.47	848.211	18.3589	<0.001	71.26	5.38143	0.6965	2.5
		5788.69	869.504	23.4738	0.00117336	58.42	3.98811	0.7363	1.8
		6854.5	736.386	26.6725	0.0229094	43.71	2.76186	0.7434	1.7
		5482.31	768.509	21.9348	<0.001	55.11	3.82325	0.7315	1.8
		3298.49	839.656	14.2523	<0.001	89.56	3.12297	0.6708	2.9
		3611.45	869.646	15.3359	<0.001	86.42	4.24701	0.6753	2.2
		3383.2	825.45	14.5047	<0.001	87.03	4.54308	0.6814	2.6
		6894.95	783.807	26.9619	<0.001	45.78	2.90053	0.7338	1.8
		10154.8	756.316	40.0762	<0.001	30.33	3.60056	0.7709	1.5
		10271.5	870.857	40.8707	0.00185307	34.16	4.77547	0.7663	1.5
		8110.22	892.149	32.907	<0.001	43.21	6.72896	0.7557	2.4
		6384.87	864.849	26.4811	<0.001	51.83	4.21132	0.7479	1.5
		5796.89	835.645	23.1846	<0.001	56.76	4.46157	0.7335	2.6
May	SHE-B` - B-C	1679.94	691.859	14.3069	<0.0001	75.7491	3.4867	0.724803	2.5592
		2184.56	796.12	16.5506	<0.0001	75.1058	4.56445	0.719025	2.35858
		3196.82	773.602	27.1976	<0.0001	45.4054	7.8721	0.759209	2.38716
		4622.6	772.054	35.5831	<0.0001	35.0211	4.48774	0.779638	1.98334
		2292.56	599.429	18.2578	<0.0001	52.7715	5.8759	0.771891	2.74268
		1092.8	754.698	9.80649	<0.0001	117.146	4.56249	0.67395	2.48106
		7204.59	785.762	39.2651	<0.0001	32.4351	6.57166	0.787366	1.7985
		1909.03	885.272	16.2589	<0.0001	85.2568	6.02369	0.724137	2.30445
		3513.97	673.555	30.3861	<0.0001	36.0259	8.50058	0.792463	2.07884
		4649.52	633.134	41.6183	<0.0001	24.6763	3.35274	0.788816	1.80056
		4295.21	697.185	38.2688	<0.0001	29.6024	3.62556	0.792065	1.99707
		4312.25	822.194	33.6746	<0.0001	39.434	10.9179	0.780798	2.1455
		3206.94	768.719	25.1619	<0.0001	48.9983	9.84232	0.767836	1.31925
		3567.45	717.802	32.1616	<0.0001	35.7865	12.3486	0.767394	1.70204
		2608.6	758.201	21.8989	<0.0001	55.6785	12.717	0.772807	2.36536
		2805.29	654.849	22.5326	<0.0001	46.7662	3.4363	0.773986	2.10219
		7257.2	766.673	64.66	<0.0001	19.3824	3.95735	0.803317	1.76024
		4063.2	838.014	34.9759	<0.0001	38.6087	8.15719	0.776543	1.86529
		2393.72	842.515	17.8303	0.00132839	74.0805	8.29104	0.72638	2.9848
		3410.48	707.078	28.484	<0.0001	40.2325	5.96501	0.787279	1.70338
		3105.78	688.921	22.6374	<0.0001	49.0341	5.41921	0.776341	1.66934
		2343.11	692.723	18.0557	0.00286731	60.6679	6.28439	0.741926	2.25622
		3378.1	764.089	30.2022	<0.0001	40.6587	10.6615	0.771628	2.60683
		1495.21	843.085	12.166	<0.0001	106.709	6.27277	0.694264	2.82135
		1913.35	816.646	14.231	<0.0001	89.9548	5.82925	0.726134	1.63093
		1872.06	820.624	16.8486	<0.0001	76.2303	6.18883	0.723322	1.99275
		2048.38	724.976	17.1741	<0.0001	66.2644	6.08953	0.728643	2.4456
		2986.16	733.182	24.2396	<0.0001	48.1359	8.19318	0.75356	2.97513
6	SHE-G` - D base	6631.07	561.245	37.9375	<0.001	23.2252	4.85066	0.728094	1.8047
		8957.13	666.14	50.805	<0.001	20.7351	4.36617	0.74133	1.66591
		5468.8	636.121	31.3622	<0.001	31.8634	4.58429	0.72927	2.4448
		13656.6	613.648	77.1878	<0.001	12.6493	5.45271	0.752464	1.52407
		9106.27	611.855	52.1076	<0.001	18.5215	4.30924	0.736652	1.48616
		2429.13	574.428	12.5569	<0.001	69.8253	4.69269	0.67801	2.59475
		25714.9	315.513	145.363	<0.001	3.46227	4.33338	0.757099	0.922392
		30559.7	740.578	172.442	<0.001	6.86984	4.2441	0.762273	0.904937
		39707.3	694.461	224.681	<0.001	4.94037	4.4453	0.760828	0.924711
		31301.7	473.905	176.896	<0.001	4.29497	4.39353	0.766377	0.838206
		4747.78	508.72	27.8382	<0.001	28.801	5.85076	0.735149	2.17167
		6661.36	487.318	38.8356	<0.001	19.7873	6.97602	0.736131	2.0885
		6912.8	664.285	40.0754	<0.001	26.2091	4.48433	0.74103	1.5494
		11306.4	458.792	65.2232	<0.001	11.2187	5.76299	0.756806	1.73255
		14595.8	620.6	83.9951	<0.001	11.7619	4.38253	0.753397	1.3303
		6336.23	630.281	36.7229	<0.001	27.2415	4.40569	0.747984	1.73992
		6263.8	531.045	36.4345	<0.001	23.1105	5.41223	0.746124	1.87965
		17658.2	726.142	101.917	<0.001	11.3735	4.21528	0.758469	1.1795
6	SHE-G` - E	995.212	914.846	6.87978	<0.001	188.993	6.94962	0.557117	6.461
		1444.82	865.277	9.2656	<0.001	139.8	5.24227	0.644246	5.0265
		1020.64	932.861	7.06013	<0.001	188.522	7.50098	0.56347	4.86057
		2071.27	761.307	13.0041	0.00524756	89.3641	4.89229	0.678115	3.51866
		2525.15	1078.23	15.2787	<0.001	108.878	8.31951	0.696942	3.4861
		1925.02	764.52	12.1753	<0.001	95.4849	5.06912	0.671421	3.86755
		1979.51	823.071	12.4303	<0.001	100.823	6.56274	0.673755	3.92963
		1731.5	658.123	10.6567	<0.001	94.9434	6.27318	0.690666	3.41938
		895.3	860.675	6.45033	<0.001	188.487	5.51729	0.547181	5.07831
		1061.5	963.745	7.43954	<0.001	185.833	5.89241	0.572374	4.67298
		916.877	884.894	6.64176	<0.001	188.256	5.22295	0.54762	4.23834
		888.634	723.93	6.20097	<0.001	168.065	6.55686	0.57821	4.6234
		1268.89	888.807	8.38726	<0.001	156.01	6.99648	0.615709	5.30034
		1135.05	837.995	7.5832	<0.001	162.285	6.95323	0.61151	4.38819
		1294.49	840.382	8.71688	<0.001	142.485	5.09194	0.6223	3.67995
		1666.51	750.331	10.7527	0.00313891	105.757	5.92951	0.665579	3.9382
		1633.33	805.639	10.8064	<0.001	111.583	4.97252	0.643897	3.5257
		2044.47	814.277	13.2094	<0.001	94.5652	5.36781	0.686865	3.94886
		2294.33	773.298	14.2037	<0.001	84.5751	6.97939	0.709156	3.45915
		2258.26	620.249	13.8853	<0.001	69.4818	6.9095	0.711473	4.31736
		1378.83	722.645	9.0243	<0.001	120.101	9.14379	0.647465	5.16652
6	SHE-G` - F	2943.97	965.926	18.8679	<0.001	78.5293	5.54106	0.686737	3.10922
		1424.06	1105.28	9.94915	<0.001	162.109	5.46573	0.600779	3.51484
		5299.4	1151.81	33.4703	<0.001	53.4609	4.49211	0.709233	2.39807
		1894.37	1028.55	11.6093	<0.001	132.751	7.32654	0.645817	3.51763
		5022.07	1136.91	31.8016	<0.001	55.6305	4.42313	0.712202	1.89091
		1238.35	992.484	8.65101	<0.001	169.194	7.19735	0.618682	3.98989
		968.819	832.12	7.19153	<0.001	165.86	5.42452	0.571119	4.66648
		1208.47	1269.5	9.17342	<0.001	196.795	5.43462	0.558024	5.59513
		1203.69	1191.35	9.07579	<0.001	186.643	4.70782	0.557812	4.33308
		802.552	1100.79	6.78387	<0.001	221.234	5.42622	0.490578	6.24178
		1154.01	1060.83	8.52644	<0.001	178.973	5.4177	0.57696	5.07201
		1576.83	1314.6	11.4224	<0.001	167.603	7.13006	0.597403	3.67919
		2643.77	936.527	17.598	<0.001	81.6714	5.04835	0.687555	3.6552
		1762.71	756.841	12.0677	<0.001	94.8652	5.35759	0.662193	3.92208
		1773.97	792.727	12.0747	<0.001	99.6145	8.55899	0.667597	3.8936
		1537.69	748.508	10.3847	<0.001	108.253	6.85548	0.649854	4.77976
		2582.68	1175.35	17.7659	<0.001	100.138	4.52404	0.663354	2.4358
		2698.85	1172.25	18.6986	<0.001	94.873	4.82654	0.663012	2.66932
		17429.7	920.516	110.005	<0.001	13.3851	4.22875	0.7622	1.08977
		17437	952.171	111.739	<0.001	13.5662	4.21062	0.75352	1.17849
		17382.1	938.186	112.923	<0.001	13.2397	4.33635	0.755294	1.13437
		16012.4	1004.32	103.483	<0.001	15.4813	4.22155	0.75713	1.61261
		2693.36	1048.25	18.3583	<0.001	87.6183	5.00217	0.687356	3.0838
		16150	938.128	104.754	<0.001	14.1769	4.30095	0.743183	1.03999
		17139.9	949.911	111.095	<0.001	13.6179	4.46937	0.754248	1.06888
		16802.1	948.787	109.388	<0.001	13.7857	4.25933	0.750496	1.2435
		7416.95	983.61	48.6674	<0.001	31.9853	4.39656	0.742659	1.85455
		9160.06	828.567	59.2653	<0.001	22.3649	4.58	0.762358	1.92827
		2295.86	1056.37	16.5261	<0.001	95.762	5.5845	0.645532	3.60936
		1702.69	914.072	12.6601	<0.001	106.282	4.7203	0.615514	3.80036
		2297.91	966.794	16.073	<0.001	91.6856	5.01574	0.675612	2.98056
		2505.26	1032.51	17.7546	<0.001	88.256	4.88525	0.667944	3.52873
		1635.03	1084.88	12.1257	<0.001	132.657	5.14938	0.627794	3.65337
		2295.84	1031.71	16.0914	<0.001	97.2207	7.19424	0.666467	4.18784
		1337.88	1257.21	10.229	<0.001	178.298	5.49571	0.590959	6.29194
		1303.08	1207.55	9.98656	<0.001	176.238	5.55135	0.598802	4.13585
		1418.62	1090.23	10.4596	<0.001	154.78	5.97746	0.630368	3.99262
6	SHE-G` - G-H	8493.3	1106.99	57.5418	<0.001	30.3343	4.35393	0.735996	1.73267
		4919.58	996.563	33.9389	<0.001	45.7224	5.21142	0.713382	2.50849
		3869.88	995.574	27.9232	<0.001	55.0295	4.65714	0.697638	2.11746
		5608.79	937.268	38.4439	<0.001	38.3005	4.31363	0.729312	2.21057
		1843.45	936.293	13.6925	<0.001	102.43	4.88347	0.645338	3.30209
		4931.28	1014.22	34.1603	<0.001	46.5123	4.6322	0.724279	2.35117
		1578.88	996.496	11.895	<0.001	124.949	4.90103	0.637893	3.8444
		1289.82	941.173	9.89798	<0.001	140.131	5.23579	0.617449	4.30765
		1456.25	1055.27	11.052	<0.001	142.041	5.1698	0.633442	4.36492
		1975.54	987.277	14.5837	0.0111096	102.837	7.6855	0.669631	5.74229
		3036.44	916.208	21.5638	<0.001	65.7309	5.54073	0.701788	4.03064
		1177.47	969.817	9.26057	<0.001	152.329	5.18202	0.595422	5.16698
		6262.43	1021.58	43.8114	<0.001	36.6636	4.43859	0.730903	1.90714
		4432.55	1033.64	31.5694	<0.001	50.9396	4.5029	0.711857	2.56127
		1661.76	1108.25	12.7971	<0.001	128.497	5.41023	0.629023	3.69472
		1378.58	1053.57	10.7587	<0.001	144.623	5.25652	0.621052	4.08817
		2065.96	1267.26	15.0052	<0.001	127.146	5.50284	0.654002	3.93593
		2908.94	1285.57	21.6287	<0.001	90.4554	4.86435	0.672809	2.91468
		7873.46	1126.61	56.0695	<0.001	31.4765	4.73499	0.724207	1.7854
		9178.34	1102.7	64.4441	<0.001	27.1357	4.32676	0.746441	1.34011
		9490.33	1080.45	66.8712	<0.001	25.6141	4.35134	0.745808	1.7667
		6924.8	1033.53	49.352	<0.001	33.0151	4.38624	0.735669	1.69408
		7765.37	1047.91	55.8391	0.00253574	29.4981	4.45077	0.730306	1.85636
7	SHE-I`-D	22569.2	600.671	57.4441	<0.001	16.65	2.459	0.7542	1.4
		20022.5	663.534	67.986	<0.001	15.55	2.66305	0.7547	1.2
		23329.2	658.023	78.3593	0.00205053	13.34	2.29854	0.7499	0.94
		16770.5	664.613	57.4429	0.00131627	18.38	2.78437	0.75	0.9
		7938.74	726.142	27.4148	<0.001	41.39	2.78132	0.7197	1.8
		11739.7	788.6	40.4547	<0.001	30.56	2.69202	0.7253	1.2
		7853.14	719.378	27.219	<0.001	41.02	2.50493	0.7074	1.2
		14286	707.733	49.8039	0.00203351	22.45	2.8921	0.7397	0.97
		11827.8	734.415	41.5432	<0.001	27.89	2.43785	0.737	1.4
		11047.9	742.607	38.8961	<0.001	30.15	2.41156	0.7387	1.2
		9437.42	713.187	33.3101	<0.001	33.65	2.24978	0.7301	1.6
		23943.6	552.394	82.7233	<0.001	10.63	2.41087	0.7536	1.1
		24251.1	557.728	84.7386	<0.001	10.5	2.60161	0.7582	0.96
		24556.4	554.269	84.6118	<0.001	10.44	2.63372	0.756	0.86
		44824.9	523.628	155.461	0.00177755	5.395	2.26385	0.7646	0.69
		30938.7	508.47	106.458	<0.001	7.668	2.52458	0.7689	0.77
		13414.2	665.826	47.7777	0.00135906	21.94	2.44291	0.7328	1.4
		14842.2	575.326	52.0718	<0.001	17.47	2.3608	0.7407	1.3
		14376.1	588.205	50.9312	<0.001	18.23	2.37507	0.7383	1.3
		22229	526.125	77.2856	<0.001	10.82	2.27763	0.75	0.91
		19999.8	586.578	70.1273	<0.001	13.33	2.53794	0.7555	1.2
		12269.9	616.505	44.0828	0.00143519	22.04	2.39544	0.7348	1.2
		17565.3	585.062	62.6379	0.00159996	14.89	2.37042	0.7561	0.98
		13423.3	633.416	47.7349	<0.001	21.03	2.69008	0.7452	1.3
		7532.16	697.046	27.6375	<0.001	39.39	2.53818	0.7187	1.7
		7868.76	680.811	28.4939	<0.001	37.38	2.59064	0.7217	1.5
		7417.67	695.873	27.6473	<0.001	39.31	2.65418	0.719	1.5
		8335.6	717.093	30.6073	<0.001	36.63	2.49591	0.7207	1.7
		8556.58	756.142	31.9775	<0.001	36.86	2.65433	0.7154	1.5
		7415.86	704.281	28.4901	<0.001	38.46	2.41757	0.7119	1.2
		46742.1	626.775	163.894	0.0163871	6.13	2.2503	0.7659	0.86
		7790.72	724.561	28.5927	<0.001	39.59	2.50417	0.7192	1.7
9	I-SHIM-1-A	3986.41	798.28	33.7564	<0.0001	36.86	2.46933	0.7151	1.8
		11015.9	615.255	90.6586	0.000125892	10.82	1.98203	0.757	1.2
		4276.86	631.535	35.61	<0.0001	27.99	2.33685	0.7377	2
		9109.19	661.396	74.4138	<0.0001	14.13	1.77151	0.7505	1.5
		3136.15	796.339	27.2697	<0.0001	45.19	3.11614	0.7023	2
		3967.83	829.517	33.1738	<0.0001	38.94	2.96998	0.7133	3.3
		5775.74	816.537	48.0387	<0.0001	26.68	2.6911	0.728	2.4
		7391.91	750.266	61.3644	<0.0001	19.35	2.32277	0.7426	2.1
		3907.72	770.625	30.8945	<0.0001	39.23	2.27175	0.7311	2.3
		4860.65	790.044	41.1311	<0.0001	30.1	1.95553	0.725	1.7
		4430.77	874.101	37.3289	0.000843887	36.65	3.00861	0.7225	3.1
		3365.7	807.665	28.7291	<0.0001	43.97	2.83381	0.7212	2.7
		4585.2	830.193	38.7912	0.00015381	33.65	1.98639	0.7306	2.9
		5746.31	645.778	45.0956	0.000339281	22.68	5.20082	0.7438	2.1
		5797.71	700.309	48.3649	0.000174842	22.95	1.99304	0.7452	2.9
		20681.8	670.525	161.813	0.000193584	6.62	1.90905	0.76	0.97
		20489.4	629.151	169.407	0.000107529	5.938	1.92097	0.7614	1
		19113.5	609.646	162.015	0.000151669	6.022	2.6533	0.7632	1.1
		5891.83	780.299	49.4205	<0.0001	25.02	2.27145	0.7448	2.8
		6691.03	806.979	56.2386	0.000185709	22.76	1.94936	0.7466	1.6
		4033.16	816.547	35.0491	<0.0001	36.62	2.36871	0.7301	2.3
		4286.83	786.868	36.7375	<0.0001	33.7	1.88232	0.732	3.6
		4168.16	756.561	35.6078	<0.0001	33.59	2.49813	0.7406	3.5
		3790.55	758.867	32.9092	<0.0001	36.25	2.4777	0.7307	2.3
		3493.64	722.456	30.236	<0.0001	37.41	3.23255	0.7233	2
		3640.66	739.31	31.7785	<0.0001	36.46	3.20504	0.725	2.3
		3553.5	802.859	30.3944	<0.0001	41.6	2.63058	0.7337	2.2
		8537.31	904.785	72.7365	<0.0001	19.82	2.96815	0.7549	1.8
		15515.5	737.371	131.096	<0.0001	9.007	2.87533	0.7642	1.5
		5262.7	706.736	45.5177	<0.0001	24.5	1.81305	0.7371	2.3
		9228.26	644.143	81.8893	0.000108502	12.62	1.74266	0.767	1.4
Spot size = 380 µm; depth of crater ~15µm. 206Pb/238U error is - with exception for the SRM614- the quadratic additions of the within run precision (2 SE) and the estimated external reproducibility of 2% (2 SD) based on NIST SRM-614 and WC-1 reference. 207Pb/206Pb error propagation (207Pb signal dependent) following Gerdes & Zeh (2009). Mean background for 206Pb, 207Pb and 238U was 22
a Within run background-corrected mean 206Pb signal in cps (counts per second).
b U and Pb content and Th/U ratio were calculated relative to NIST SRM-614 soda lime glass.

## Sheet: Barbur (BRBC) Raw data
Barbur cave (BRBC) Data
Measurement	sample	206Pba	Ub	Pbb	Thb	238U d	±2s	207Pbd	±2s	Excluded
Sequence		(cps)	(ppb)	(ppb)	U	206Pb	(%)	206Pb	(%)	measurement
6	BRBC-4 - C-F	8288.33	1076.91	28.37	<0.001	60.4309	5.0763	0.753486	1.79389
		23532.8	843.677	79.9076	0.00204391	17.0734	5.46057	0.782341	0.970135
		6913.68	1072.67	23.8142	<0.001	71.7535	4.49316	0.754638	2.28202
		11901.6	1196.67	40.1875	<0.001	48.0542	5.91586	0.778565	1.75714
		21677.1	1221.96	64.3721	<0.001	30.8235	4.94365	0.790022	0.968892
		22264.1	634.495	75.0817	0.00269671	13.7399	8.07471	0.792466	1.17095
		18954.1	1452.98	60.334	<0.001	39.1743	7.45301	0.793396	1.77345
		28990.8	551.783	97.0339	0.00400365	9.29129	4.92792	0.801713	1.02692
		13451.3	645.87	45.7933	0.00105138	22.7886	4.53221	0.78081	1.16954
		20414.5	1296.44	69.589	<0.001	30.1187	4.50171	0.781886	1.26093
		16560	1021.38	56.0443	<0.001	29.5463	5.44571	0.787126	1.12119
		10549.4	1070.46	36.6431	<0.001	46.5796	4.46533	0.756349	1.58726
		9024.75	1038.59	30.981	<0.001	53.8359	8.42857	0.769498	1.72728
		16644.5	591.923	56.7296	0.0010837	16.8785	5.85737	0.782965	1.2771
		17125.6	1603.07	59.8137	<0.001	42.7526	5.15279	0.757156	1.15994
		12886.2	1770.39	44.664	<0.001	63.6324	5.42088	0.768846	1.58786
		21590.2	1793.06	74.7814	<0.001	38.8956	5.27948	0.788215	1.04468
		24533.1	1839.39	91.9975	<0.001	32.4826	8.91677	0.791018	1.04625
		41290.3	1703.04	141.587	<0.001	19.4997	4.51498	0.787032	0.747307
		20933.3	1618.75	72.6984	<0.001	35.8294	4.22015	0.773172	1.22611
		19873.2	1590.69	69.2616	<0.001	37.2658	5.00872	0.788717	1.0625
		7685.55	1128.38	27.3565	<0.001	65.3323	4.48892	0.7442	2.27916
		11770.7	1078.99	41.4806	<0.001	41.4691	5.80881	0.756063	1.49189
		8240.34	1086.44	28.591	<0.001	61.2477	5.55268	0.776286	1.87866
		7373.56	1261.25	26.5648	<0.001	75.6416	5.16998	0.754865	2.17506
		7401.12	1277.63	26.4266	<0.001	76.939	5.09249	0.752821	2.4488
		7978.15	1240.7	28.4833	<0.001	69.4863	5.29141	0.757204	1.93743
		9496.95	1279.2	33.7596	<0.001	60.5042	5.44822	0.758996	2.11322
		6986.97	1226.21	24.8104	<0.001	78.7704	6.46948	0.755563	3.12763
		8999.95	1543.24	32.6144	<0.001	75.3194	7.42058	0.753244	2.98792
		11096.5	1534.46	40.0798	<0.001	60.925	4.55235	0.752742	2.01788
		18237.1	1634.56	66.5339	<0.001	39.8925	4.98183	0.790081	0.998093
		14579	1685.81	52.1718	<0.001	51.6667	5.65308	0.761505	1.56004
		33472.1	1618.11	118.755	<0.001	22.0153	4.32887	0.78078	0.920659
		14184.2	1532.2	50.1923	<0.001	49.4538	5.10769	0.785731	1.10694
		16302.1	1759.34	58.4844	<0.001	48.2832	4.40238	0.768501	1.2966
		29340.5	1399.27	103.437	<0.001	22.0115	5.14657	0.793914	1.0659
		11483.1	1590.28	41.2306	<0.001	61.9971	4.67042	0.771184	1.46014
		14613.1	1532.82	51.8474	<0.001	47.9903	5.40153	0.789459	1.31666
		9952.25	1486.04	35.9686	<0.001	66.3216	4.60466	0.768763	1.66798
		14252.2	1738.45	51.1514	<0.001	54.7257	4.94323	0.774457	1.97002
		25282.3	523.716	88.2356	0.00204779	9.63269	4.46821	0.789054	1.09354
		18036.4	497.407	64.3488	0.00347715	12.5471	5.07118	0.789383	1.23079
		16098.5	1052.73	57.4658	<0.001	29.763	4.64677	0.791084	1.1469
		24590.7	1542.98	89.0442	<0.001	27.9009	4.27689	0.774363	1.06112
		21026.1	392.209	75.4963	0.00284152	8.43019	4.46761	0.788834	1.12073
		11530	1728.64	42.3055	<0.001	65.2222	5.18081	0.75833	2.04065
		12781	1647.51	46.7061	<0.001	56.5836	5.79469	0.767427	1.54806
		10551.1	1080.83	38.9503	<0.001	44.296	4.97376	0.758447	1.4492
		11483.4	993.056	41.944	<0.001	38.112	5.37486	0.773909	1.33746
		10501.6	1727.99	39.0646	<0.001	70.2981	5.09705	0.750307	1.49472
		22764.8	1600.3	83.7867	<0.001	30.6449	4.4203	0.767836	1.28387
		15835	1625.84	59.3127	<0.001	43.4477	4.22543	0.74548	1.17174
		17785.8	1984.2	66.0924	<0.001	47.893	4.37742	0.757277	1.13567
		25280.5	330.568	91.279	<0.001	5.89814	4.89978	0.79564	1.05256	X
		3323	547.307	11.6611	<0.001	75.1781	5.23667	0.764731	2.92576	X
		2293.35	587.405	8.61527	<0.001	108.419	6.03939	0.751361	2.81385	X
		7209.76	562.797	25.9372	<0.001	35.2716	4.83898	0.792066	1.71683	X
		4022.25	462.526	14.7877	<0.001	50.4823	6.47088	0.7788	2.97556	X
		7547.29	1090.24	28.324	<0.001	61.3857	4.75684	0.756685	1.84248	X
		15761.1	496.368	59.0419	<0.001	13.4132	4.59977	0.757495	1.12475	X
		8230.03	1143.09	31.2198	<0.001	57.8763	6.24674	0.74051	1.95823	X
		12393.9	652.89	47.1489	<0.001	22.1115	5.08046	0.759017	1.88581	X
		13156.2	847.316	49.6584	<0.001	27.3745	4.25836	0.767676	1.45987
		15863.5	1887.86	59.4011	<0.001	51.3303	4.31255	0.780059	1.32579
		10367.1	2022.99	39.9477	<0.001	80.2508	5.34806	0.745106	1.78087
		9239.43	1960.25	36.0035	<0.001	85.619	4.63319	0.731128	1.72175
		10844.7	1906.57	41.1046	<0.001	74.4852	5.80309	0.769442	1.55802
		23670.7	1567.99	90.244	<0.001	27.7952	4.46426	0.762371	0.983802
		9017.28	2015.7	35.3428	<0.001	89.6779	4.80511	0.730943	1.77593
		8220.07	1868.78	32.2885	<0.001	90.8841	4.8145	0.728521	1.66561
		7299.4	1838.63	28.7837	<0.001	100.18	4.25455	0.726253	1.63904
		8353.29	1855.3	32.7613	<0.001	89.2111	5.32175	0.734296	1.71646
		9069.16	1953.74	35.2917	<0.001	87.8666	4.4083	0.74797	1.94051
		13648.1	552.639	36.9294	<0.001	24.3394	7.89065	0.793123	1.41724	X
		29669.2	438.476	111.907	<0.001	6.38658	12.2846	0.79717	1.24644
		30490.7	225.191	116.183	0.00352064	3.14913	5.5283	0.791139	1.19043
		30906.9	230.429	115.35	0.00394071	3.2573	5.25909	0.797853	0.761064
		16460.6	325.092	66.1632	0.00355581	7.97609	4.83331	0.789505	1.25956
		13558.3	265.888	51.8646	0.00546848	8.29519	4.57387	0.783489	1.69493
		14625.7	1953.51	56.4007	<0.001	55.6015	5.54906	0.768785	1.39956
Spot size = 380 µm; depth of crater ~15µm. 206Pb/238U error is - with exception for the SRM614- the quadratic additions of the within run precision (2 SE) and the estimated external reproducibility of 2% (2 SD) based on NIST SRM-614 and WC-1 reference. 207Pb/206Pb error propagation (207Pb signal dependent) following Gerdes & Zeh (2009). Mean background for 206Pb, 207Pb and 238U was 22
a Within run background-corrected mean 206Pb signal in cps (counts per second).
b U and Pb content and Th/U ratio were calculated relative to NIST SRM-614 soda lime glass.

## Sheet: Reference materials
Nama = stromatolitic limestone from the Cambrian-Precambrian boundary in South-Namibia (Feldschuhhorn below Spitskopf formation, Schwarzrand subgroup)
WC-1 = carbonate reference material (Roberts et al. 2017)
ASH15 = flowstone, speleothem from Negev desert, Israel (Vaks et al., 2003)
Measurement	sample	206Pba	Ub	Pbb	Thb	238U d	±2s	207Pbd	±2s
Sequence		(cps)	(ppb)	(ppb)	U	206Pb	(%)	206Pb	(%)
1	NBS NIST-614	519324	915.722	2911.76	0.954203	1.24891	1.78228	0.8684	2.27851
	Primary Standard	515081	900.071	2939.49	0.941797	1.23962	1.77677	0.8702	2.28067
		438555	765.313	2575.36	0.888874	1.22911	1.82983	0.8743	2.3092
		494173	907.668	2939.31	0.943749	1.22549	1.78106	0.8705	2.3115
		473925	895.485	2934.23	0.982022	1.22145	1.77819	0.8703	2.33961
		454574	878.23	2812.69	0.921234	1.24363	1.886	0.8712	2.34306
		431411	876.886	2838.54	0.975508	1.25313	1.78567	0.8715	2.37012
		450203	917.018	2944.65	0.973142	1.24953	1.77732	0.8713	2.36656
		427092	918.325	2978.29	0.950986	1.24533	1.76708	0.8704	2.38616
		445009	935.497	3080.78	0.952042	1.23016	1.79875	0.8711	2.39481
		397474	915.36	2997.1	0.982689	1.22926	1.77812	0.8743	2.42683
		403970	930.389	3005.37	0.958182	1.23931	1.79073	0.871	2.41293
		377355	935.097	2998.34	0.947102	1.25612	1.80673	0.8694	2.43281
		383225	938.419	3062.1	0.949289	1.23762	1.77233	0.8705	2.43874
		343727	884.733	2895.54	0.955525	1.23077	1.79139	0.8738	2.45796
		332575	871.443	2853.64	0.969447	1.22835	1.78419	0.8721	2.45632
		312723	860.418	2843.96	0.951051	1.21271	1.7876	0.8725	2.46172
		306730	862.961	2785.03	0.981124	1.2387	1.77407	0.8723	2.46098
		297958	916.935	2941.51	0.947759	1.25392	1.79454	0.8724	2.46867
		295308	911.91	2912.73	0.937938	1.25518	1.78632	0.8689	2.47824
		254606	854.131	2802.74	0.95474	1.2364	1.79654	0.8693	2.46445
		250070	842.496	2775.92	0.97594	1.23778	1.78643	0.8715	2.46948
		235073	866.021	2854.23	0.995855	1.23655	1.7791	0.8701	2.45977
		228093	836.94	2797.64	0.972038	1.23153	1.79063	0.8698	2.44454
		219504	944.808	3105.66	0.988338	1.23686	1.79241	0.8688	2.38233
		216509	934.284	3106.12	1.00943	1.241	1.79069	0.8702	2.37794
1	WC-1	185569	6157.42	317.224	0.00023947	22.2568	2.12918	0.127	1.3752
	Secondary Standard 1	185980	6229.4	320.551	0.000204845	22.2124	2.09321	0.1262	1.8466
		169661	6218.98	313.185	0.00025035	22.5124	2.54021	0.1233	2.50453
		163928	6246.85	299.817	0.00016052	23.1374	2.57372	0.1152	3.11639
		190551	6662.8	370.157	0.000385532	21.6357	2.21766	0.1447	2.04822
		152135	6215.13	317.659	0.000182788	22.6912	2.2573	0.1327	4.2939
		180521	6775.66	359.114	0.000222466	21.8484	2.1481	0.1307	1.78158
		153464	6557.54	326.778	0.000173892	22.5938	2.512	0.121	1.96228
		154587	6946.9	361.909	0.000207202	22.3864	2.3998	0.1338	4.07487
		140426	6439.35	314.677	0.000199618	23.2558	2.10029	0.1228	1.81092
		143925	7118.28	358.62	0.00020616	22.6963	2.20139	0.1281	2.85621
		199995	6908.68	792.169	0.000161683	16.0102	5.8818	0.3502	7.86956
		150399	7623.76	392.049	0.000165419	22.0653	2.36569	0.1243	2.92561
		143776	7601.76	377.196	0.000228618	22.9779	2.23259	0.126	3.23302
		143235	7999.11	399.984	0.000143278	22.6963	2.59219	0.1233	1.8667
		134173	7782.01	376.95	0.000181545	22.9779	2.11358	0.1159	2.43755
		134244	8011.18	411.226	0.000169633	22.6398	2.26665	0.1334	2.53892
		117288	7201.81	359.94	0.000138017	22.9568	2.45733	0.1283	5.91763
		122735	7967.95	422.388	0.000130004	22.5479	2.14253	0.1443	3.34918
		111064	7391.33	374.375	0.000200419	22.6296	2.11095	0.1279	2.01799
		100853	7445.28	372.446	0.000155707	22.5378	2.15586	0.1215	1.82926
		102796	7644.92	386.862	0.000197049	22.6603	2.41974	0.1279	4.5922
		95718.6	7917.16	390.312	0.000182115	22.8467	2.15195	0.1221	3.01909
		86412.8	7170.74	352.831	0.000165133	22.8154	2.25671	0.1198	2.93792
		92631.3	8535.02	466.725	0.000172017	21.9298	2.26581	0.1452	2.93937
		87052.2	8403.57	409.654	0.000169107	22.9253	2.17755	0.1175	3.66321
1	ASH-15	82050.6	5615.5	453.4	<0.0001	41.5628	2.85308	0.8458	0.798234
	Secondary Standard 2	6023.51	2269.26	33.2902	<0.0001	228.415	7.96596	0.7699	3.24054
		2897.43	5731.7	10.4149	<0.0001	1141.94	4.00822	0.4371	6.61912
		28033.9	2553.33	162.673	<0.0001	52.5762	11.4904	0.8276	1.2217
		24640.4	2720.93	148.169	0.000105572	60.9385	3.03259	0.829	1.5764
		90866.6	1588.94	561.29	<0.0001	9.81354	6.85811	0.8507	1.07905
		1935.6	2802.86	8.97218	<0.0001	759.878	7.94934	0.5448	6.8541
		37499.4	2378.14	239.801	<0.0001	33.4336	2.95606	0.8478	0.988443
		1691.83	3281.77	8.00013	0.00035723	953.289	9.13634	0.4766	7.8674
		1484.39	3320.47	7.07594	0.000340178	1100.96	6.80902	0.4594	7.23982
		291980	3591.6	2159.63	<0.0001	5.67537	3.83832	0.8588	0.553382
		33932	3273.31	261.478	<0.0001	43.0478	10.4948	0.8462	1.03261
		169624	3667.78	1337	<0.0001	9.40734	2.49903	0.8547	0.639677
		100146	4120.93	858.776	0.00410781	17.7494	4.52611	0.8476	0.866089
		14018.8	2738.6	117.136	<0.0001	76.9231	9.32517	0.8269	1.57101
		1547.87	4451.14	7.20977	<0.0001	1159.82	5.70466	0.3949	5.71825
		86966.4	3369.44	782.483	0.000269876	14.6177	2.66169	0.8558	0.759342
		29794.9	2598.74	270.665	<0.0001	32.9381	2.95574	0.8506	1.18838
		976560	2756.22	9780.57	<0.0001	0.94162	11.503	0.8616	0.511717
		43243	4081.44	421.451	0.000173894	32.5733	2.71188	0.8474	0.937382
		674830	3768.28	7435.2	0.000235824	1.72028	5.00599	0.8617	0.474055
		105880	3727.14	1165.69	<0.0001	10.8026	4.04839	0.853	0.705096
		37157.3	4097.07	502.055	<0.0001	30.3767	11.5911	0.845	0.908438
		3443.49	4606.51	38.4457	<0.0001	369.14	10.8398	0.6904	4.77049
		481277	3545.17	6907.54	<0.0001	1.75716	2.15142	0.8608	0.633907
		863.653	5056.87	6.75416	<0.0001	1377.22	4.29483	0.3242	9.20367
2	NBS NIST-614	404133	820.979	2607.8	0.969832	1.249	0.452387	0.8693	0.26
	Primary Standard	407795	817.552	2619.43	0.998015	1.236	0.512711	0.8702	0.5
		383450	792.525	2538.92	0.949453	1.235	0.456068	0.8702	0.45
		361407	744.195	2402.19	0.992005	1.221	0.395961	0.869	0.5
		390703	837.519	2674.33	0.949676	1.24	0.554768	0.8716	0.47
		386463	840.695	2662.2	0.933423	1.245	0.464443	0.8703	0.52
		363460	806.311	2600.68	0.992564	1.227	0.369033	0.8703	0.43
		365765	811.103	2601.18	0.982845	1.243	0.266619	0.8706	0.49
		347100	821.26	2621.09	0.952176	1.243	0.301567	0.8698	0.47
		350482	838.404	2653	0.974018	1.25	0.547269	0.8716	0.49
		313598	790.382	2527.96	0.948996	1.232	0.420074	0.8706	0.46
		326953	811.596	2610.09	0.965592	1.234	0.297265	0.8717	0.44
		329662	910.984	2829.39	0.90371	1.257	0.584532	0.8701	0.53
		332521	878.093	2810.29	0.924374	1.236	0.24781	0.8729	0.44
		306160	839.674	2704.68	0.933385	1.24	0.471362	0.8725	0.48
		295003	809.186	2613.86	0.966308	1.229	0.267617	0.8729	0.48
		288761	816.393	2663.58	0.969706	1.225	0.47961	0.8718	0.52
		286041	813.039	2656.59	0.954191	1.22	0.38863	0.871	0.48
		276750	866.764	2738.41	0.933288	1.256	0.345009	0.8716	0.41
		299617	922.362	2956.45	0.886071	1.238	0.484716	0.8745	0.51
		243448	794.476	2569.33	0.948413	1.25	0.528916	0.8713	0.56
		240365	783.823	2543.66	0.928943	1.247	0.437117	0.8695	0.5
		216970	746.457	2466.23	1.0129	1.227	0.345147	0.8705	0.52
		222004	758.932	2519.63	1.00574	1.228	0.484619	0.8722	0.47
		213358	807.893	2626.84	1.00248	1.24	0.430691	0.8706	0.47
		216918	828.69	2698.75	0.981893	1.24	0.369548	0.8695	0.46
2	WC-1	17748.4	5900.99	294.437	0.000187766	22.22	3.70217	0.1326	4.08043
	Secondary Standard 1	28052.3	6356.58	355.577	0.000259605	21.64	2.20909	0.1453	1.546
		19964.9	6273.6	337.778	0.000205364	21.36	3.37229	0.1611	1.8768
		91250.3	6335.71	714.656	0.000352023	16.66	5.00604	0.3188	7.08043
		20120.2	6430.17	324.06	0.000137304	22.24	2.51616	0.1202	2.29032
		76386.1	6462.34	674.134	0.000126716	16.74	7.1218	0.2981	11.4149
		314200	6600.39	2358.73	0.00015734	7.429	9.1477	0.607	3.60644
		23336.1	6580.72	351.392	0.000157366	21.88	2.40117	0.1348	3.5122
		32495.7	6954.85	438.807	0.000246039	20.73	2.18427	0.1872	2.10388
		23828.7	6777.47	374.288	0.000165394	21.45	2.44152	0.1388	1.87947
		23913.7	6989.57	389.364	0.000248447	21.72	2.97938	0.1471	2.23351
		49391.6	6714.17	537.794	0.000178364	19.74	4.59807	0.2304	7.8032
		22426.7	7347.22	421.788	0.000199853	20.88	3.15796	0.1697	2.90974
		20370.9	7331.28	385.069	0.000106213	21.84	2.70369	0.1278	1.86428
		19873.5	6948.88	366.715	0.000249854	22.51	2.42754	0.1427	2.10084
		17677.6	7331.49	360.756	<0.0001	23.01	2.61819	0.12	1.81889
		55035.3	6972.28	679.882	0.000318424	17.57	5.84271	0.2929	5.61525
		109457	7749.24	1211.27	0.000198055	13.29	6.63617	0.4193	6.89336
		26139.8	8189.97	470.946	0.000487613	22.24	2.32384	0.1633	4.26292
		118170	8100.56	1146.97	0.000164333	16.2	6.80105	0.342	6.13033
		17773.4	6415.4	363.672	0.000279482	22.15	2.76389	0.1548	3.20209
		18230.4	7255.55	394.441	0.000237825	22.47	2.36122	0.1447	2.21361
		20564.3	6899.8	421.324	0.000199063	21.46	2.78148	0.1752	4.95859
		13463.1	7372.8	364.682	0.000242075	22.75	2.37185	0.1205	1.17268
		36116	6143.37	614.804	0.000116947	17.05	2.79767	0.3162	2.63746
		27501.2	7803.84	541.696	0.000172556	20.79	3.55099	0.2139	10.42
2	ASH-15	2792.72	4355.21	18.2888	<0.0001	680.8	10.5885	0.6068	6.00637
	Secondary Standard 2	4717.37	1595.24	38.2884	<0.0001	175.6	7.4737	0.7891	3.85383
		244447	5996.48	1573.46	<0.0001	13.02	12.624	0.8578	1.56372
		1974	3480.82	14.0704	<0.0001	651.4	11.3107	0.5998	4.70117
		2829.45	6458.06	19.2963	<0.0001	876.6	9.30327	0.5566	7.25606
		943.151	1562.83	6.61295	<0.0001	675.9	6.60952	0.5872	3.93929
		8441.3	5243.15	60.4857	<0.0001	274.8	3.38076	0.7513	1.7518
		21898.3	3565.11	152.68	<0.0001	77.99	5.94903	0.8289	1.73937
		28646.1	3822.75	198.137	<0.0001	63.89	14.2038	0.8288	2.04862
		58482.1	3827.49	428.758	<0.0001	30.24	16.4678	0.855	0.972609
		11966.3	2808.66	94.6227	<0.0001	98.62	4.44565	0.8227	1.59743
		4621.76	3651.75	36.5939	<0.0001	309.6	6.86337	0.7475	2.19853
		84111.6	3615.15	657.044	<0.0001	19.65	21.0731	0.8497	0.908627
		3341.31	3113.1	27.6797	<0.0001	336.9	7.99782	0.7169	3.52389
		1488.3	3508.34	13.4324	<0.0001	681.9	7.45643	0.6186	6.87887
		7707.17	2135.05	68.04	<0.0001	101.9	4.2992	0.8258	1.37301
		36285.8	3436.38	287.719	<0.0001	47.76	8.9259	0.8546	0.71515
		7276.08	1938.53	64.8883	<0.0001	96.14	3.47639	0.8269	2.35866
		7732.45	4347.92	74.6117	<0.0001	187.5	6.22438	0.7978	2.57032
		110136	2368.15	1040.21	<0.0001	7.963	22.6913	0.8558	1.35854
		14235.2	3250.8	145.545	<0.0001	76.43	26.1245	0.8053	2.82608
		1175.03	4771.43	14.2952	<0.0001	855.2	8.83163	0.5372	6.33314
		845.923	3415.13	11.4987	<0.0001	822.7	9.79012	0.5427	5.87332
		705.318	6358.03	9.33516	<0.0001	1374	12.3265	0.3593	16.3813
		72451.9	3390.45	879.901	<0.0001	13.35	4.76353	0.8622	0.652395
		1359.85	3201.29	13.7362	0.00050926	840.7	13.2521	0.5522	9.90685
2	Nama	43452.5	1899.2	400.379	0.0192954	6.239	2.12364	0.4351	0.97
	Secondary Standard 3	71246.3	4661.58	776.589	0.0275074	7.403	1.83653	0.3409	0.92
		63147.5	3266.58	640.583	0.0272703	6.572	2.39031	0.4049	0.81
		72061	4694.62	804.505	0.0185722	7.256	1.75802	0.3526	0.69
		80056.9	8363.46	1179.95	0.0391619	8.314	1.74268	0.2715	1
		78960.8	6926.31	974.575	0.0165594	8.393	1.95944	0.2807	1.6
		64992.5	3299.13	644.1	0.0123296	6.573	1.78293	0.3983	0.69
		63412.2	5121.74	777.344	0.0132151	7.99	1.89564	0.3172	0.78
		61938.3	4215.77	692.536	0.0199749	7.489	1.82176	0.3374	0.97
		41171.5	1826.25	370.863	0.0152488	6.435	2.0991	0.4255	1.1
		75884.5	4732.41	851.722	0.03407	6.987	1.84526	0.3689	0.67
		41565.4	2515.61	444.424	0.0165619	7.158	2.14386	0.3768	1.2
3	NBS NIST-614	304207	767.675	2505.31	0.998074	1.244	0.284028	0.8689	0.262265
	Primary Standard	290244	714.801	2364.64	0.951861	1.235	0.573957	0.8685	0.288673
		297054	803.423	2670.13	0.99097	1.221	0.394761	0.8715	0.219875
		291894	822.091	2659.34	0.974982	1.233	0.193578	0.8687	0.268598
		310760	911.285	2930.14	0.940246	1.254	0.238964	0.8708	0.236466
		303992	881.417	2866.3	0.943092	1.243	0.398884	0.8718	0.204747
		282530	866.685	2821.11	0.982889	1.241	0.378054	0.8734	0.184949
		281731	869.339	2812.42	0.971503	1.248	0.422279	0.8713	0.317597
		257710	861.344	2761.32	0.968012	1.242	0.355691	0.8696	0.263773
		259698	844.119	2757.8	0.965968	1.231	0.410016	0.8722	0.240936
		236381	821.37	2677.97	0.963351	1.232	0.336317	0.8715	0.341697
		232256	810.815	2654.1	0.975351	1.227	0.370957	0.8728	0.253377
		209247	768.376	2531.75	0.902971	1.226	0.588692	0.8721	0.305785
		214860	769.283	2567.8	0.982584	1.224	0.294728	0.8744	0.299575
		212945	841.045	2718.72	0.934632	1.262	0.421381	0.8683	0.257796
		211878	841.204	2731.85	0.981466	1.255	0.332087	0.8745	0.283442
		194946	824.502	2715.05	0.961775	1.244	0.457391	0.8691	0.224922
		189919	794.763	2644.11	0.998811	1.245	0.33693	0.8732	0.180438
		178936	799.047	2755.31	0.970439	1.219	0.294871	0.8718	0.278886
		162266	764.696	2559.24	0.944083	1.217	0.54805	0.8693	0.602059
		156437	828.718	2727.01	0.921822	1.245	0.3611	0.8691	0.294928
		152962	803.799	2661.08	0.940577	1.253	0.295865	0.8711	0.22999
		141756	852.895	2857.39	0.923209	1.236	0.440378	0.8702	0.415729
		136533	811.944	2748.36	0.951331	1.237	0.416229	0.8698	0.191044
3	ASH-15	628263	2794.75	3259.01	0.000272334	3.066	6.44087	0.8717	1.4378
	Secondary Standard 1	154993	3313.24	798.5	<0.0001	14.4	7.53332	0.8535	0.517805
		13530.7	2093.93	74.9373	0.000238712	93.68	5.7612	0.8242	1.40609
		1393.42	3744.37	9.24128	<0.0001	966.7	7.05757	0.4916	6.57744
		53480.6	2909.61	315.397	<0.0001	32.09	5.768	0.849	0.670679
		128989	2799.21	766.656	0.00013814	12.55	5.5799	0.8602	0.541426
		374350	2134.17	2374.27	<0.0001	3.052	5.53458	0.8624	0.512238
		194905	3390.74	1212.4	<0.0001	9.761	10.6705	0.8631	0.512824
		16417.7	3220.93	111.223	<0.0001	94.59	11.0749	0.8322	1.13658
		4486.76	2599.25	30.2871	<0.0001	268.7	4.64791	0.7653	2.14394
		55058.9	3135.77	387.763	<0.0001	27.85	7.28987	0.8519	0.859286
		151.077	3358.51	2.55681	<0.0001	1871	5.10225	0.1531	11.9201
		61427.5	2230.92	462.613	<0.0001	16.63	4.12732	0.8626	0.89577
		61345.4	1333	438.966	0.0104907	11.17	12.6203	0.861	0.750272
		89281.6	2505.39	720.727	<0.0001	12.01	9.84185	0.8616	0.56599
		11039	2291.33	88.9165	<0.0001	87.59	6.17321	0.8263	1.14127
		110617	2394.27	991.992	<0.0001	8.185	7.5873	0.8666	0.546487
		245.534	4430.75	3.81007	<0.0001	1781	4.32478	0.2018	9.10307
		212962	2435.41	1836.66	<0.0001	5.527	4.22902	0.8651	0.64304
		569.964	2445.26	6.51774	<0.0001	897.3	6.45939	0.5196	6.5325
		517166	2501.86	5295.51	0.000234491	1.812	23.1115	0.8686	0.828604
		55459.2	2420.8	581.081	0.000300724	15.5	10.6602	0.8654	0.850019
		62403	1752.7	793.109	<0.0001	7.832	4.95427	0.8677	0.803989
		365.282	1047.36	5.19786	<0.0001	572.4	11.8751	0.648	5.67101
3	WC-1	26256.5	5178.08	295.881	0.000311867	21.07	2.00258	0.1589	1.5648
	Secondary Standard 2	23039.7	5136.21	273.223	0.000499374	21.92	2.01005	0.1435	1.56293
		44684.6	5032.77	516.905	0.000610659	14.66	2.49756	0.3781	9.48852
		21924.6	5062.36	270.686	0.000441229	21.87	1.98316	0.1408	1.7787
		18906.5	5084.79	266.618	0.000143952	21.69	2.0648	0.1458	3.23191
		21089.9	5354.97	270.746	0.000387003	22.58	2.04101	0.1247	1.23223
		32825.7	5750.92	374.965	0.000569921	20.24	2.07386	0.2012	4.97623
		47068.3	5163.53	403.208	0.000362917	19.94	2.65973	0.2421	10.1072
		27007.7	5457.19	322.337	0.000480044	21.59	2.56232	0.1678	3.94957
		25451.2	5428.4	314.759	0.000398058	21.33	3.3729	0.1552	10.2162
		30978.9	5667.03	390.696	0.000299779	19.53	2.06596	0.2193	3.19506
		674554	5543.56	4146.84	0.000592766	4.613	3.82239	0.7098	0.86478
		44341	5447.68	491.306	0.000398942	17.4	4.22071	0.2851	3.70536
		16112	5554.72	286.33	0.000439794	22.15	2.19437	0.1414	1.48502
		27724.7	5775.55	385.891	0.000319008	20.02	5.28929	0.2013	3.02437
		32072.1	5715.63	404.097	0.000516552	20.03	4.44862	0.2112	10.1994
		16930	5775.24	283.807	0.00034212	23.64	2.86132	0.1131	8.50416
		13910.5	5872.43	276.638	0.000293099	23.68	2.13101	0.1182	2.72078
		27176.7	6226.66	438.007	0.000325162	19.4	1.98126	0.2066	3.49779
		16207.3	5564.4	293.062	0.000417379	22.91	2.06435	0.1337	3.93399
		37741.9	5518.36	490.325	0.000413823	18.9	2.845	0.2395	5.90336
		11026	5677.14	251.921	0.000331394	24.63	1.99967	0.07797	1.29894
		17766	6068.84	399.378	0.000411172	19.76	2.12076	0.2013	3.26096
		9994.36	5197.81	252.662	0.000319514	23.64	2.03737	0.1285	2.13562
		12578.3	5576.56	338.524	0.000327641	20.69	2.07211	0.1735	5.57318
		9269.42	6287.46	276.035	0.00030586	24.61	1.98397	0.07167	1.70652
4	NBS NIST-614	114839	721.857	2319.54	0.987844	1.248	0.639379	0.8685	0.460599
	Primary Standard	121604	757.825	2466.04	0.919845	1.225	0.860662	0.8708	0.531775
		130291	843.512	2722.78	0.941941	1.249	0.701087	0.8746	0.315276
		133258	861.375	2801.23	0.915422	1.235	1.02794	0.8675	0.425368
		128235	882.822	2826.46	0.961501	1.253	0.464403	0.8735	0.401223
		128042	851.943	2815.36	0.967014	1.214	0.653101	0.8687	0.376121
		119894	855.193	2787.05	0.983992	1.232	0.526766	0.869	0.377407
		119446	854.365	2765.22	0.970226	1.246	0.511884	0.8724	0.298089
		111694	846.996	2743.61	0.965657	1.236	0.546386	0.8689	0.367403
		110626	834.232	2695.89	0.960252	1.245	0.46777	0.877	0.335382
		99482	790.286	2561.74	0.947132	1.234	0.436608	0.8717	0.418304
		99712	788.738	2562.81	0.972114	1.238	0.574332	0.8702	0.315434
		95476.7	803.393	2580.12	0.972639	1.246	0.35108	0.8746	0.286994
4	WC-1	8102.1	4646.3	214.223	0.000119663	23.63	0.57092	0.09916	1.80159
	Secondary Standard 1	11133.5	5004.43	266.002	0.000179691	22.1	1.43074	0.134	7.77551
		11654.8	4777.78	267.915	0.000161391	22.02	3.81374	0.1527	12.132
		8395.67	4644.36	234.301	0.000278182	22.39	1.53824	0.1267	3.69482
		9011.48	4513.22	234.918	<0.0001	22.51	1.88322	0.133	9.97618
		9789.56	5146.51	265.721	0.000219682	22.33	1.28294	0.1274	4.68444
		5753.85	3797.07	180.739	0.000191509	22.89	0.77598	0.1086	2.29208
		13317.6	4597.2	301.552	0.000288304	20.43	1.82763	0.1871	5.24441
		4332.13	3303.64	152.552	0.000234844	23.23	0.72705	0.1008	2.57554
		7359	3689.95	187.788	0.000225099	23.43	0.648091	0.1035	1.83609
		7488.22	3916.38	222.565	0.000223835	21.71	1.42211	0.1441	5.65744
		7064.94	3700.32	207.231	0.000963798	21.67	1.03555	0.144	2.85523
		73083.8	4140.19	1152.97	0.000199883	9.018	16.1129	0.5033	13.2221
		7378.48	4497.18	243.435	0.00143188	22	1.60983	0.1472	4.46654
4	ASH-15	9893.46	2229.49	107.032	<0.0001	73.86	6.68821	0.8431	1.77785
	Secondary Standard 2	659056	2147.59	6415.05	<0.0001	1.336	5.81274	0.8652	0.792096
		3831.72	2395.4	40.3568	<0.0001	227.9	13.8198	0.7809	2.08126
		6731.51	1815.48	71.5037	<0.0001	101.4	16.4348	0.8256	1.65606
		6547.51	1894.87	78.1577	<0.0001	83.33	11.0595	0.845	1.9879
		24274	2780.06	292.325	<0.0001	33.08	7.01073	0.8513	0.948454
		241.592	4245.3	4.52377	<0.0001	1548	5.45254	0.2777	6.27593
		503.653	3324.91	7.83986	<0.0001	1046	5.72093	0.4421	3.61046
		1091.55	1308.53	15.0036	<0.0001	272	4.84984	0.7473	2.92535
		16746.2	1682.42	218.366	<0.0001	27.26	5.95882	0.8568	1.08576
		2518.55	1505.44	33.6239	<0.0001	166	6.37304	0.8091	2.79349
		8094.55	1987.42	112.925	<0.0001	61.23	6.443	0.8501	1.69309
		11510.3	2012.5	168.736	<0.0001	42.39	6.81883	0.8552	1.28841
		4524.96	1719.96	61.3075	<0.0001	105.8	17.8172	0.8372	2.29485
5	NBS NIST-614	296044	882.948	2822.6	0.997613	1.247	0.360526	0.867	2.17387
	Primary Standard	297063	873.286	2827.54	1.00222	1.228	0.399897	0.8654	2.17263
		273393	821.639	2649.05	0.985602	1.237	0.378955	0.864	2.19444
		264577	799.548	2566.05	0.961837	1.244	0.349859	0.8672	2.19247
		262413	796.148	2590.45	1.02449	1.234	0.261847	0.8654	2.21283
		255557	770.976	2520.44	0.988208	1.226	0.3526	0.8655	2.22328
		262884	843.217	2689.41	0.95906	1.256	0.373637	0.8698	2.24007
		266943	853.612	2711.13	0.943954	1.249	0.424967	0.8695	2.25143
		243837	772.71	2534.93	1.00139	1.218	0.478943	0.872	2.27857
		247002	791.118	2562.39	0.974814	1.228	0.40137	0.867	2.28795
		235725	798.434	2570.89	0.975809	1.251	0.389171	0.8749	2.35111
		232657	786.924	2533.95	0.972157	1.248	0.357695	0.87	2.34273
		219687	751.926	2462.8	0.985403	1.221	0.50851	0.8705	2.40453
		212343	742.97	2386.22	0.960399	1.244	0.479587	0.8772	2.40123
		199485	716.163	2305.82	0.985361	1.251	0.317032	0.8734	2.43476
		197935	698.968	2289.01	0.963803	1.227	0.436646	0.8725	2.44243
		249049	1034.57	3355.25	0.869798	1.239	0.534115	0.8745	2.76447
		244637	1006.57	3279.07	0.897778	1.228	0.441762	0.8727	2.77271
		215004	904.022	2905.1	0.889381	1.253	0.380097	0.8744	2.74325
		217954	911.537	2928.37	0.935752	1.245	0.418965	0.8748	2.75126
		186029	808.605	2605.88	0.948946	1.241	0.4168	0.8739	2.78514
		195772	814.747	2718.76	0.926874	1.214	0.493773	0.8745	2.7772
		165791	756.139	2415.42	0.942568	1.243	0.577278	0.8727	2.87301
		166105	743.162	2426.85	0.946789	1.24	0.386958	0.8754	2.87949
5	WC-1	125010	4981.39	244.57	<0.001	22.55	3.48377	0.1147	1.70352
	Secondary Standard 1	917243	6382.34	4777.58	<0.001	3.91	7.93426	0.7367	1.34915
		145276	6077.7	276.931	<0.001	23.42	3.47188	0.1008	1.63379
		142164	5896.76	280.813	<0.001	23.06	3.48479	0.1117	2.01961
		150115	5597.15	376.838	<0.001	20.39	3.94259	0.1969	7.10745
		136981	5523.33	316.083	<0.001	21.87	3.46791	0.1592	1.33321
		132070	5701.13	274.935	<0.001	23.15	3.5451	0.1165	2.98582
		139800	5860.64	306.764	<0.001	22.5	3.61818	0.1367	3.36352
		109323	4718.05	241.863	<0.001	22.32	3.54568	0.1264	2.52208
		254539	5377.67	1255.12	<0.001	10.79	12.605	0.4979	8.8708
		132151	5044.29	438.82	<0.001	19.1	8.32743	0.2522	17.7412
		327165	5631.55	1694.5	<0.001	8.479	17.1201	0.5099	11.9248
		108342	5154.79	249.432	<0.001	23.03	3.45856	0.1181	1.67983
		317301	5753.04	1727.54	<0.001	8.71	6.46976	0.5827	2.77072
		195878	4173.45	1028.21	<0.001	9.905	5.49271	0.5394	2.45217
		263963	6454.19	1405.33	<0.001	11.26	11.1238	0.5067	8.30075
		104482	5569.5	312.203	<0.001	21.73	3.53069	0.1492	3.77808
		120240	6584.63	337.535	<0.001	22.2	3.69435	0.1228	5.34131
		80227.9	4263.4	251.573	<0.001	21.42	3.62919	0.1653	3.99422
		124825	6219.31	445.825	<0.001	19.94	5.59333	0.2068	14.308
		155681	4753.57	1323.66	<0.001	12.05	19.4497	0.4631	17.7562
		120900	6906.07	378.772	<0.001	22.24	3.85824	0.1514	4.31138
		88195.1	5574.62	248.396	<0.001	23.3	3.71943	0.09261	6.18939
		94110.7	5867.89	273.587	<0.001	23.06	3.49813	0.1044	2.54963
5	ASH-15	45819.1	2499.05	276.255	<0.001	30.73	6.04018	0.8378	0.836173
	Secondary Standard 2	36134.5	2658.91	216.797	<0.001	41.5	5.71986	0.8436	1.12067
		203989	2255.62	1212.76	<0.001	6.18	10.3855	0.853	0.521962
		1082.48	1839.54	4.8602	<0.001	1006	7.91387	0.4584	8.30635
		13961.6	1794.14	85.5596	<0.001	70.08	7.27199	0.8401	1.5155
		94338.1	1785.08	589.394	<0.001	10.31	8.63634	0.8573	0.638917
		98179.9	1503.98	741.809	<0.001	8.204	8.7424	0.858	0.539836
		88141.8	1923.98	549.475	<0.001	12.4	6.98392	0.8564	0.759868
		10260.3	2168.26	64.2605	<0.001	111.4	9.53235	0.8079	1.76086
		968.027	2631.02	3.33086	<0.001	1395	4.49712	0.312	7.39555
		23203.6	2986.15	160.418	<0.001	63.93	8.90442	0.839	1.13238
		111823	4264.29	777.741	<0.001	18.97	8.3872	0.8525	0.755675
		13845.8	2586.12	100.923	<0.001	89.73	6.68554	0.8291	1.55791
		1135.96	2158.22	5.4713	<0.001	955.5	4.89323	0.4673	5.09188
		876.414	3007.54	2.7634	<0.001	1675	5.14973	0.2187	8.00953
		9743.7	1791.98	85.3703	<0.001	85.45	23.2319	0.836	1.84972
		658.749	1573.42	4.00997	<0.001	1032	18.5156	0.4353	15.9994
		91724.9	2942.94	1986.98	<0.001	14.25	45.9531	0.8467	0.8426
		1156.27	1966.39	7.63347	<0.001	708.9	4.93567	0.5611	4.61457
		4474.45	3607.24	33.7528	<0.001	340.7	6.42059	0.727	2.81123
		610.179	2192.59	2.81734	<0.001	1403	7.61306	0.3132	9.37577
		115934	2735.33	1146.35	<0.001	9.339	11.2502	0.8592	0.541829
		14312.5	2497.87	131.673	<0.001	63.81	16.4317	0.8328	1.61325
		9768.32	3267.11	111.966	<0.001	127.4	27.517	0.8159	2.62841
6	NBS NIST-614	393727	954.63	3061.38	0.964589	1.247	0.419284	0.8744	0.323554
	Primary Standard	380373	901.666	2915.54	0.890901	1.254	0.593963	0.8714	0.310717
		352768	870.817	2830.24	0.943172	1.239	0.388798	0.8704	0.238867
		344229	838.369	2758.99	0.881162	1.227	0.848989	0.874	0.441911
		322255	818.562	2700.38	0.983872	1.218	0.442244	0.8744	0.310486
		285913	770.334	2446.84	0.769484	1.241	0.933704	0.8726	0.468913
		331414	894.407	2873.76	0.996535	1.259	0.312943	0.8727	0.219754
		301865	808.468	2636.03	0.890806	1.235	0.765702	0.8693	0.381313
		280605	788.742	2588.41	0.896265	1.232	0.655428	0.872	0.35114
		267554	751.731	2471.85	0.835815	1.232	0.869254	0.8742	0.456233
		252191	761.569	2469.85	0.889528	1.243	0.809616	0.8721	0.396643
		269491	825.732	2641.86	0.960902	1.26	0.575056	0.8723	0.321137
		235159	761.147	2462.56	0.918274	1.249	0.868802	0.8711	0.466365
		206634	640.139	2155.89	0.787616	1.212	0.926504	0.8718	0.447972
		241938	856.085	2711.04	0.920124	1.267	0.529207	0.8759	0.301343
		202095	677.633	2251.9	0.74145	1.211	1.13389	0.8726	0.456593
		219636	817.894	2628.15	0.906982	1.252	0.679599	0.8713	0.376475
		228672	835.159	2751.4	0.994074	1.221	0.576512	0.8672	0.297592
		199023	827.442	2634.38	0.975164	1.262	0.569455	0.8702	0.348886
		185822	744.907	2445.34	0.902884	1.23	0.791767	0.8718	0.357415
		175991	807.513	2619.94	0.960176	1.236	0.614034	0.8694	0.373569
		142783	694.644	2210.87	0.720293	1.206	1.1915	0.8683	0.575243
		189892	945.955	3120.04	1.01836	1.265	0.540453	0.8664	0.255634
		182113	956.972	3100.14	0.844205	1.239	0.607241	0.8687	0.305372
		156664	981.048	3199.62	0.847845	1.233	1.05961	0.8653	0.58061
		160441	1011.4	3287.43	0.922299	1.237	0.877204	0.8665	0.485684
6	WC-1	40271.4	5274.77	353.804	0.00104641	20.2	4.2441	0.1825	3.83325
	Secondary Standard 1	36327.9	5465.96	356.424	<0.001	19.95	4.20351	0.1764	6.49483
		28146.9	5612.51	309.718	<0.001	21.84	4.14447	0.1397	1.56472
		30362.5	5266.3	329.214	<0.001	20.08	4.14058	0.164	3.27362
		30936.6	6160.95	337.932	0.00180094	21.84	4.19545	0.1396	8.71143
		27694.4	4926.5	295.582	<0.001	21.64	4.35775	0.1768	3.49864
		17812.3	5355.81	259.924	<0.001	22.44	4.36858	0.1061	1.66667
		35768	5173.5	365.185	<0.001	19.4	4.41236	0.2001	4.98522
		30322.6	5600.93	358.291	<0.001	20.36	4.44662	0.1655	8.13039
		15248.3	5294.48	248.556	<0.001	22.9	4.34586	0.1042	2.88894
		37604.1	5422.13	402.887	<0.001	19.63	5.6951	0.2213	9.99535
		25970	5365.69	321.85	<0.001	21.57	4.62929	0.1736	7.32497
		17024.7	5199.2	267.188	<0.001	22.76	4.16713	0.1339	1.92006
		25737.1	5512.24	337.776	<0.001	21.31	5.17978	0.1771	10.1474
		10083.3	5722.44	239.005	<0.001	24.39	4.19446	0.08742	1.70355
		16357	5729.68	281.219	<0.001	23.25	4.13473	0.1149	1.34498
		11217.4	5361.13	245.302	<0.001	23.57	4.16548	0.1062	1.58205
		29658.3	4911.96	377.727	<0.001	19.46	5.97073	0.2314	11.9947
		14811.2	6398.39	310.995	<0.001	23.5	4.18521	0.1286	1.42402
		13172.3	5261.74	262.617	<0.001	23.21	4.26955	0.1314	5.11618
		35523.9	7434.91	564.913	<0.001	19.56	5.91254	0.2363	11.8368
		17393.4	6504.25	355.059	<0.001	22.5	4.19258	0.144	2.89206
		9910.46	5401.7	265.141	<0.001	23.19	4.22277	0.1241	2.16353
		10160.8	5897.6	284.745	<0.001	23.18	4.17249	0.1172	3.09905
		17256	7355.77	461.722	<0.001	20.88	4.37003	0.1805	5.08582
		429168	7826.11	5524.25	<0.001	4.715	26.0131	0.647	8.777
6	ASH-15	15164.5	2700.6	81.0469	<0.001	111	5.19239	0.8283	1.36593
	Secondary Standard 2	12705.9	3029.17	70.0444	<0.001	147.1	6.04592	0.8174	1.51529
		1798.52	1587.06	8.87359	<0.001	600.5	7.32074	0.6321	3.59019
		3306.55	2383.68	18.6683	<0.001	164.7	5.47029	0.7003	3.05738
		55812.4	2250.3	320.942	<0.001	399.2	6.32349	0.8567	0.843167
		13624.4	2221.96	79.4541	<0.001	24.01	8.30019	0.826	1.85532
		24452.6	2339.22	145.654	<0.001	92.15	5.00789	0.8499	1.23257
		10522.1	2341.77	70.6423	<0.001	54.07	7.9978	0.8235	1.70029
		27436.5	1897.33	173.007	<0.001	121	7.21087	0.8565	1.25149
		11375.3	2454.36	72.8441	<0.001	37.34	5.77835	0.8296	1.48841
		172033	2522.13	1174.9	<0.001	112.7	7.5398	0.8542	0.63045
		327.901	1614.63	2.72993	<0.001	7.221	6.42932	0.3748	5.27403
		21141.5	2879.55	152.051	<0.001	1238	5.81818	0.8412	1.11011
		17583.6	2069.66	119.61	<0.001	63.68	7.65744	0.8339	1.6374
		27324.1	3117.15	208.539	<0.001	62.23	7.08543	0.8479	0.866972
		784.528	3623.73	6.9181	<0.001	50.63	6.02509	0.4203	4.32531
		5726.5	2665.42	48.1047	<0.001	1107	8.2188	0.7957	2.23089
		30867.9	2590.12	253.577	<0.001	179.1	9.07585	0.8588	0.898986
		11087.8	2347.09	102.135	<0.001	35.1	7.77088	0.841	1.59591
		24994.3	2263.55	227.076	<0.001	76.28	7.31543	0.8627	1.12123
		7142.22	3820.73	74.3259	<0.001	34.34	5.07071	0.8077	1.98644
		32812.1	3208.57	339.766	<0.001	167.4	6.33568	0.8518	1.0067
		4187.55	3193.73	47.7851	<0.001	32.25	5.35192	0.7772	1.96994
		3091.11	3494.35	38.4245	<0.001	225.7	5.67333	0.74	3.23339
		302457	2149.11	4251.63	<0.001	300.9	22.8686	0.8635	0.675434
		14874	3368.46	214.583	<0.001	1.734	15.6388	0.8421	1.50682
7	NBS NIST-614	403740	824.557	2684.67	0.971429	1.231	2.16838	0.8704	2.29476
	Primary Standard	394290	819.92	2640.18	0.987317	1.246	2.1674	0.8709	2.30127
		371081	809.841	2635.67	0.986091	1.233	2.17117	0.8709	2.36825
		366913	817.421	2613.19	0.937126	1.255	2.18119	0.8708	2.36145
		379453	851.214	2844.42	1.01913	1.205	2.15233	0.8701	2.38864
		349439	811.31	2628.61	0.981122	1.238	2.18155	0.8709	2.39071
		331889	821.048	2630.56	0.900328	1.251	2.22189	0.8696	2.41696
		328045	802.78	2592.65	0.891515	1.25	2.1978	0.8708	2.40887
		329796	835.536	2745.95	1.02254	1.235	2.15801	0.8747	2.41899
		300286	800.761	2551.35	0.905914	1.249	2.26582	0.8741	2.44567
		301167	826.775	2718.5	0.989461	1.229	2.15957	0.8707	2.4406
		291712	814.956	2659.15	0.934506	1.229	2.18835	0.8704	2.45477
		270899	842.597	2702.7	0.989468	1.247	2.18414	0.8692	2.494
		261909	801.42	2600.79	0.924055	1.236	2.18425	0.8705	2.51545
7	WC-1	19327.3	5460.92	283.75	<0.001	21.82	3.68518	0.1235	3.31412
	Secondary Standard 1	15553.5	4639.34	235.928	<0.001	22.14	2.75112	0.1209	2.35853
		26925.8	6171.49	359.619	<0.001	21.15	2.94615	0.1537	6.0561
		15486.6	5491.36	263.029	<0.001	22.86	2.71155	0.1121	1.66625
		27027.3	5478.64	360.178	<0.001	20.34	4.80512	0.1988	8.05525
		14756.5	4347.22	228.188	<0.001	8.339	2.68818	0.1347	4.52808
		21026.5	6203.11	332.628	<0.001	22.3	2.72022	0.1405	2.05608
		12112.6	3552.31	192.739	<0.001	22.18	2.62504	0.1448	1.72144
		12722.3	6365.6	285.216	<0.001	22.18	2.65317	0.1005	1.43325
		13578.7	5567.2	264.633	<0.001	23.64	2.65351	0.1169	2.308
		14651	6208.08	307.282	<0.001	23.39	2.68937	0.1234	1.91838
		11876.6	6471.6	285.027	<0.001	22.76	2.78454	0.1005	2.31316
		11270.5	5670.88	272.021	<0.001	24.03	2.71364	0.1131	1.56666
		8256.75	4248.05	199.196	<0.001	22.94	2.66673	0.1106	2.09252
7	ASH-15	626.174	3718.11	4.97849	<0.001	1294	4.57484	0.345	5.53012
	Secondary Standard 2	34895.6	2805.57	224.698	<0.001	42.31	6.17235	0.8454	0.938709
		36865.4	2425.53	239.2	<0.001	36.89	13.4848	0.8492	1.06541
		16928.9	2610.37	114.017	<0.001	76.61	3.96173	0.8201	1.12578
		1204.15	2960.63	9.63246	<0.001	816.1	4.62635	0.5376	5.70636
		129882	2361.01	919.21	<0.001	8.93	9.64081	0.8566	0.645566
		1390.22	3567.42	14.9292	<0.001	800.6	9.60109	0.5254	7.79168
		488.675	2798.23	4.8087	<0.001	1222	3.82377	0.3724	6.34523
		629.918	2290.17	5.36738	<0.001	1007	7.38211	0.4684	9.46979
		13933.9	2365.53	112.032	<0.001	70.44	3.74757	0.8273	1.39306
		1880.45	4222.34	17.6438	<0.001	679.8	4.4783	0.6128	4.04735
		11998.5	2488.57	102.856	<0.001	81.46	8.20784	0.8285	1.55846
		1081.48	3284.64	10.8809	<0.001	763.5	9.04503	0.5589	5.81933
		20508.7	2465.64	190.488	<0.001	44.85	10.3611	0.844	1.09509
8	NBS NIST-614	366023	868.92	2825.99	1.1363	1.235	1.92087	0.871	2.31295
	Primary Standard	325814	772.887	2516.69	0.952178	1.234	2.02283	0.8713	2.32819
		346490	863.979	2783.86	1.1349	1.244	1.93261	0.8718	2.32054
		315343	787.505	2537.68	0.982413	1.244	2.01044	0.8708	2.33099
		323430	848.107	2732.6	1.16035	1.244	1.92612	0.8726	2.33866
		310859	809.367	2637.53	1.0761	1.228	1.96365	0.8697	2.34845
		324617	905.692	2917.79	1.15447	1.248	1.93211	0.8732	2.37455
		289911	800.52	2608.27	0.971275	1.229	2.03132	0.8704	2.39595
		281526	846.163	2743.27	1.08081	1.237	1.97108	0.8706	2.42631
		258936	778.345	2531.77	0.977843	1.232	2.00787	0.8686	2.42622
		256964	831.163	2721.17	1.15135	1.225	1.9321	0.8748	2.45593
		219885	729.327	2338.56	0.929176	1.248	2.02224	0.8681	2.47188
		264481	951.498	3034.5	1.10512	1.262	1.92752	0.8717	2.47368
		234019	834.8	2690.53	0.839686	1.244	2.02013	0.8694	2.49068
		216691	817.924	2687.76	0.918285	1.223	1.96172	0.8712	2.4769
		205292	761.765	2542.95	0.888372	1.208	2.06346	0.8743	2.49654
		195883	808.816	2594.87	0.960402	1.252	2.06623	0.8739	2.4659
		186824	768.117	2479.26	0.904699	1.246	2.00827	0.8731	2.46937
		167264	747.047	2414	0.843217	1.244	2.05529	0.8731	2.39394
		173943	773.721	2511.14	0.853671	1.234	2.29027	0.8727	2.45413
		160727	806.188	2595.35	0.917376	1.246	2.17614	0.8725	2.32065
		138287	671.142	2201.53	0.78535	1.236	2.06715	0.8697	2.3126
		135861	781.624	2514.74	0.912044	1.246	2.15837	0.8711	2.26962
		126299	716.967	2347.08	0.809493	1.221	2.10984	0.8694	2.23135
		144017	1117.08	3507.18	0.787584	1.248	2.08467	0.8694	2.25586
		138770	1046.14	3356.84	0.727545	1.231	2.23429	0.8616	2.26249
8	WC-1	20217.9	6994.04	360.991	0.000386992	21.7	3.74298	0.118	2.81449
	Secondary Standard 1	17177.7	6596.98	322.481	0.000321192	22.56	3.5321	0.1123	3.87731
		21978.8	7246.17	387.154	0.000520875	21.46	3.58699	0.1255	3.59119
		14881.7	6028.97	293.689	0.000319024	22.6	3.61782	0.1118	4.8475
		16238.3	7323.84	349.054	0.000342781	22.81	3.51548	0.1066	2.32405
		20809	7776.67	410.168	0.000888752	21.49	3.74231	0.1216	5.21919
		28055	9939.75	549.577	0.00052614	21.31	3.48215	0.1379	4.18745
		14777.1	6691.3	318.733	0.000661178	23.33	3.45981	0.1154	2.74125
		17850.9	8407.11	432.701	0.000701149	21.57	3.82441	0.1296	2.72543
		19987.7	7046.45	391.109	0.000700765	21.92	3.71458	0.1498	6.56911
		15026.5	7506.42	373.359	0.000505416	22.59	3.49853	0.119	4.40603
		14430	6936.18	345.889	0.000694516	22.89	3.53795	0.1256	3.25928
		14210.1	8447.45	399.738	0.000550032	23.26	3.52567	0.1115	3.64031
		11984.4	6373.23	316.289	0.000700762	22.85	3.51797	0.1228	3.43937
		12355	6578.44	334.05	0.000338039	22.93	3.86682	0.1315	8.67076
		10891.8	5115.74	280.599	0.000494181	21.94	3.62717	0.1431	4.49273
		9505.38	6714.67	311.61	0.000506531	23.6	3.53936	0.1099	3.30154
		10524.5	7238.95	342.163	0.000379071	23.13	3.51737	0.111	2.16647
		12504.3	8119.97	400.693	0.000525103	23.27	3.52176	0.1302	3.45152
		12138.2	7139.94	372.012	0.000352631	22.71	3.67125	0.1387	5.42566
		6483.94	5813.39	265.461	0.000165262	23.63	3.5246	0.1069	2.47751
		9521.91	6297.96	345.61	0.000672863	22.14	3.95726	0.1464	3.56014
		8064.94	6599.4	326.235	0.000430801	23.58	3.53191	0.133	2.93181
		7653.44	7756.24	359.665	0.000732982	23.78	3.658	0.1138	4.01917
		5988.54	11552.6	490.969	0.000282364	23.53	3.72297	0.08363	1.97332
		7940.71	12320.2	548.142	0.000546134	23.75	3.46881	0.1024	2.86073
8	ASH-15	495.28	4256.83	5.32603	<0.0001	1430	5.03139	0.3184	8.0086
	Secondary Standard 2	442.831	4585.52	4.9939	<0.0001	1491	5.04472	0.2726	5.886
		2727.42	2578.61	22.792	<0.0001	340.7	5.25116	0.7281	2.66011
		1103.54	3296.86	9.77573	<0.0001	815.7	11.3954	0.5152	7.78468
		1325.81	3099.97	12.5792	<0.0001	680.9	5.90852	0.6141	4.68588
		613.881	3647.93	6.15421	<0.0001	1171	8.54158	0.3983	10.0436
		458.232	2933.63	5.14607	<0.0001	1150	11.1753	0.3766	12.7596
		1666.35	4160.89	16.3461	<0.0001	665.3	13.0083	0.5897	6.0477
		263.699	3328.5	3.8601	<0.0001	1453	7.42235	0.2775	9.22192
		12521.8	4303.33	122.14	<0.0001	115.7	9.42045	0.8072	1.51682
		1202.34	3748.01	13.2446	<0.0001	690.8	5.62426	0.588	3.45902
		2980.98	3181.13	33.0623	<0.0001	298.7	7.80338	0.7418	3.33101
		705.938	2962.32	8.97603	<0.0001	800.7	4.21399	0.5454	5.50387
		1407.49	3203.45	17.7973	<0.0001	545.4	5.32798	0.664	3.78337
		1005	4645.34	13.8705	<0.0001	831	5.75697	0.5491	4.98995
		3345.94	2556.81	42.1556	<0.0001	198.4	7.25221	0.7905	2.58593
		4423.54	4025.6	59.4534	<0.0001	212.6	12.1114	0.7751	1.91383
		672.482	3971.85	10.61	<0.0001	871.3	8.0459	0.4793	9.10514
		287.267	4998.3	5.39412	<0.0001	1548	3.83942	0.2885	5.53863
		3423.35	5839.22	53.2908	<0.0001	344.6	13.387	0.7308	3.47135
		3533.83	6120.18	58.7027	<0.0001	320.8	5.85157	0.7478	2.39601
		2296.58	4304.24	37.741	<0.0001	343	6.77644	0.7394	3.02871
		1783.29	3937.81	34.2179	<0.0001	345.6	4.94422	0.727	2.96969
		221.07	5673.37	6.13548	<0.0001	1577	6.48845	0.2787	6.8558
		2655.98	5639.78	66.1313	<0.0001	266	10.1625	0.7551	2.84048
		979.863	7376.82	25.7693	<0.0001	745.2	5.13111	0.5804	3.90445
9	NBS NIST-614	354193	928.731	2960.43	0.958441	1.241	1.57204	0.8696	2.41359
	Primary Standard	359994	908.257	2967.25	0.945945	1.226	1.55957	0.8704	2.42923
		328945	896.557	2849.96	0.965979	1.24	1.54462	0.8764	2.42714
		322703	868.591	2777.32	0.940242	1.252	1.56647	0.8691	2.42959
		296866	829.585	2668.08	0.997708	1.244	1.55143	0.8715	2.44718
		304245	825.201	2722.03	0.978973	1.227	1.55528	0.8707	2.44581
		275773	815.133	2608.33	0.984314	1.251	1.56128	0.8699	2.46791
		288238	821.269	2697.89	0.982686	1.229	1.5615	0.8757	2.46621
		250495	801.152	2553.62	0.951862	1.246	1.59738	0.8726	2.50096
		255330	786.026	2582.69	0.970758	1.223	1.57683	0.8702	2.50594
		226597	763.383	2471.99	0.997838	1.236	1.55996	0.8712	2.5162
		218987	743.761	2389.88	0.956764	1.245	1.61224	0.8729	2.51557
		209751	748.352	2427.64	0.98666	1.245	1.54411	0.8691	2.52535
		191986	679.289	2226.42	0.913181	1.223	1.86352	0.8775	2.56966
		197331	762.871	2439.6	0.997669	1.25	1.57857	0.8707	2.52194
		183768	701.811	2273.82	0.922606	1.233	1.74174	0.8725	2.55779
		182183	741.163	2388.91	1.02153	1.236	1.56585	0.8731	2.50222
		173902	704.379	2293.03	1.00005	1.226	1.63802	0.8674	2.54445
		177649	795.775	2523.21	1.01288	1.254	1.55209	0.8677	2.45606
		163531	708.744	2313.03	0.923728	1.236	1.70706	0.8738	2.47868
		195065	949.694	3042.05	0.992756	1.248	1.57147	0.8685	2.37709
		176818	862.026	2764.33	0.817273	1.236	1.82161	0.8685	2.40187
		160717	850.045	2778.57	0.800553	1.231	1.66456	0.8655	2.32393
		163017	876.242	2848.74	0.935054	1.231	1.9848	0.8702	2.36769
		163049	1075.55	3458.17	1.00104	1.236	1.55089	0.8703	2.27948
		159039	1060.83	3408.33	1.00351	1.244	1.63634	0.8708	2.28477
9	WC-1	12967.9	5230.8	253.997	<0.001	22.76	3.0333	0.1118	3.15278
	Secondary Standard 1	16042.2	4589.47	262.795	<0.001	21.14	3.85865	0.1486	3.85925
		11542.5	5310.08	244.082	<0.001	23.31	2.96309	0.1034	1.59959
		57898.7	6837.81	659.517	<0.001	17.21	7.39393	0.2783	11.9985
		25588.7	5011.05	375.777	<0.001	18.57	5.89839	0.2121	7.94043
		93575.1	4904.26	880.372	<0.001	12.76	12.0748	0.4427	11.5823
		15443	6108.51	309.609	<0.001	22.65	3.08199	0.1269	3.20005
		12665.2	4842.71	251.032	<0.001	22.6	3.2363	0.1344	2.66633
		18992.4	7451.8	387.625	<0.001	22.83	3.05371	0.1391	1.42969
		14973.2	3911.44	253.146	<0.001	20.75	3.93372	0.1866	7.3916
		10092.5	4146.14	222.761	<0.001	22.01	3.08951	0.1375	2.77875
		120853	7525.36	1244.11	<0.001	14.89	11.6395	0.4153	14.0314
		17782.7	6530.77	373.206	<0.001	22.13	2.95244	0.1613	1.34913
		18177.7	7669.74	426.628	<0.001	21.79	2.94782	0.1529	2.267
		19493.5	6275.98	402.375	<0.001	20.99	3.50062	0.1898	5.08786
		17257	7155.7	430.043	<0.001	20.43	7.38976	0.1578	7.57688
		15751.2	7193.3	398.36	<0.001	21.81	3.30579	0.1479	5.38684
		8706.36	3471.14	205.295	<0.001	21.43	3.09786	0.1659	4.32002
		335415	7175.53	4677.22	<0.001	4.532	12.1527	0.6985	2.58054
		16119	6100.87	385.131	<0.001	21	3.09161	0.187	1.95454
		96463.9	8720.58	1659.6	<0.001	11.6	8.66914	0.4594	6.40209
		13118.7	8285.59	445.542	<0.001	21.75	5.50412	0.1381	7.414
		13117	8366.41	462.414	<0.001	21.42	3.62314	0.1438	2.23366
		8345.47	6381.99	314.724	<0.001	23.11	3.03692	0.1254	2.79179
		14193.7	9298.6	562.479	<0.001	20.71	3.93468	0.1625	5.5996
		9165.78	8725.82	433.485	<0.001	22.72	3.05179	0.1216	3.43303
9	ASH-15	972.73	3035.53	8.35443	<0.001	881.4	7.30607	0.5215	7.35365
	Secondary Standard 2	3035.57	4046.52	24.3082	<0.001	490.6	4.43856	0.6793	2.37507
		228.809	2615.15	2.61673	<0.001	1485	5.32768	0.2552	7.78768
		2456.57	2564.18	18.9533	<0.001	442.9	13.7685	0.6997	5.21329
		21732.8	2943.26	182.423	<0.001	55.1	11.0448	0.8497	1.34905
		15144.2	3138.34	127.655	<0.001	83.51	9.84341	0.8335	1.64637
		565.416	2989.19	6.34627	<0.001	1062	3.71614	0.462	5.2746
		1063.35	3090.12	10.2302	<0.001	778.5	8.56741	0.5589	4.80356
		1194.82	2925.09	12.3038	<0.001	644.9	4.14915	0.6094	3.434
		314.628	3217.85	4.19544	<0.001	1363	4.58974	0.3249	7.37252
		24032.4	2019.98	249.39	<0.001	27.62	5.97922	0.8487	1.13807
		408.362	1998.51	4.48914	<0.001	948.6	3.75495	0.4692	5.436
		1557.73	3606.76	15.4398	<0.001	719.2	15.9873	0.5786	8.64782
		215.824	3166.8	3.66511	<0.001	1458	3.75327	0.2658	8.01756
		413.324	3277.7	6.62002	<0.001	1199	6.05326	0.4129	7.08426
		4636.47	3699.72	56.8086	<0.001	474.6	4.50337	0.6702	3.28823
		444.706	3948.84	7.4036	<0.001	1190	4.9075	0.4117	8.03163
		8264.49	2807.75	102.521	<0.001	92.2	6.36088	0.8176	1.57729
		434.89	3387.54	7.07026	<0.001	1058	5.50687	0.4459	9.21249
		699.317	3290.17	10.1049	<0.001	810.1	5.34897	0.5353	5.78933
		6223.15	4045.66	93.1337	<0.001	140.1	4.16168	0.7977	1.98783
		1330.66	3646.14	20.4247	<0.001	520.8	8.89273	0.6665	4.44766
		311.519	4201.13	6.48265	<0.001	1237	7.9351	0.3925	8.80816
		1411.83	2508.72	24.9598	<0.001	332.8	7.72761	0.7309	4.19238
		9025.28	4014.55	215.172	<0.001	111.9	9.37323	0.8219	2.78173
		131.448	4945.43	4.06385	<0.001	1626	4.62335	0.2243	8.56577
9	Nama	38638.7	3209.3	616.923	0.0306778	6.623	1.73355	0.3868	1.2
	Secondary Standard 3	27910.4	2939.03	490.439	0.0257459	7.398	2.07003	0.3423	1.5
		29841.5	3033.8	518.142	0.0241257	7.252	1.85652	0.3469	1.2
		30062.8	3067.39	522.804	0.0207973	7.297	1.94472	0.3528	1.4
		40619.2	3969.56	705.975	0.040606	7.029	2.43869	0.3603	1.3
		34081.3	2541.55	525.395	0.013428	6.3	1.84005	0.4204	1.2
		42838.1	3792.45	719.199	0.0263125	6.707	1.81938	0.3853	0.67
		88728.6	3528.57	1094.17	0.12525	4.523	2.05822	0.5357	0.9
		39229.7	2700.5	587.203	0.0102133	6.034	1.7199	0.4316	0.91
		45726.1	2784.01	662.602	0.0332457	5.604	2.23897	0.4566	1.7
